# Supplementary material
Source: MDPI journal article supplement (https://www.mdpi.com/2304-6740/12/2/39)
Supplement: s1 [file s1]

# **Theoretical insights into the regiodivergence in Ni-catalyzed [2+2+2] cycloaddition of unsymmetric diynes and CO<sub>2</sub>**

Kun Zhang,<sup>†</sup> Qiwen Huang,<sup>†</sup> Cun Yang, Xinyao Li\*

Department of Chemistry, College of Science, Shanghai Engineering Research Center of Organ Repair, Shanghai University, Shanghai 200444, CHINA

E-mail: xinyaoli@shu.edu.cn

<sup>†</sup> These authors contributed equally.

# DFT-Computed Energies of All Stationary Points

**Table S1.** Sum of electronic and zero-point energies ( $E$ , in Hartree), Sum of electronic and thermal free energies ( $G$ , in Hartree), thermal correction to Gibbs free energy ( $CGFE$ , in Hartree), electronic energy in THF ( $E_{\text{THF}}$ , in Hartree), and free energies in THF ( $G_{\text{THF}}$ , in Hartree). For transition state structures, one imaginary frequency (Ifreq) was observed and given below. For all minimum structures, no imaginary frequency was observed.

| Structure            | $E$          | $G$          | $CGFE$    | $E_{\text{THF}}$ | $G_{\text{THF}}$ | Ifreq   |
|----------------------|--------------|--------------|-----------|------------------|------------------|---------|
| Ni(COD) <sub>2</sub> | -793.033336  | -793.075393  | 0.322693  | -795.227883      | -794.90519       |         |
| COD                  | -311.839767  | -311.871559  | 0.148956  | -312.121644      | -311.972688      |         |
| 1                    | -679.880041  | -679.925313  | 0.181370  | -680.269821      | -680.088451      |         |
| CO <sub>2</sub>      | -188.565952  | -188.586668  | -0.009098 | -188.648113      | -188.657211      |         |
| L1=PMe <sub>3</sub>  | -460.980413  | -461.008634  | 0.085314  | -461.167696      | -461.082382      |         |
| Ni(L1) <sub>2</sub>  | -1091.291264 | -1091.338712 | 0.182243  | -1093.312542     | -1093.130299     |         |
| INT1-1a              | -1771.220996 | -1771.291021 | 0.388564  | -1773.628765     | -1773.240201     |         |
| INT2-1a              | -1498.776314 | -1498.841912 | 0.289769  | -1501.078851     | -1500.789082     |         |
| TS1-1a               | -1498.752067 | -1498.815148 | 0.293472  | -1501.066239     | -1500.772767     | -202.89 |
| INT3-1a              | -1498.786339 | -1498.848197 | 0.297690  | -1501.107387     | -1500.809697     |         |
| INT4-1a              | -1498.803852 | -1498.860759 | 0.303186  | -1501.111351     | -1500.808165     |         |
| TS2-1a               | -1498.780468 | -1498.836295 | 0.304112  | -1501.086307     | -1500.782195     | -238.33 |
| INT5-1a              | -1498.815044 | -1498.872822 | 0.303387  | -1501.114615     | -1500.811228     |         |
| TS3-1a               | -1498.802405 | -1498.858540 | 0.304194  | -1501.098606     | -1500.794412     | -338.34 |
| 2                    | -868.525878  | -868.567861  | 0.205519  | -868.985488      | -868.779969      |         |
| TS4-1a               | -1959.758881 | -1959.830556 | 0.400016  | -1962.253030     | -1961.853014     | -243.04 |
| INT6-1a              | -1959.798039 | -1959.867514 | 0.406921  | -1962.302345     | -1961.895424     |         |
| TS5-1a               | -1959.746266 | -1959.808764 | 0.413850  | -1962.246786     | -1961.832936     | -291.21 |
| INT7-1a              | -1959.828979 | -1959.893644 | 0.412874  | -1962.318400     | -1961.905526     |         |
| TS6-1a               | -1959.806770 | -1959.870468 | 0.412303  | -1962.284688     | -1961.872385     | -374.87 |
| INT1-1b              | -1771.209431 | -1771.275161 | 0.393121  | -1773.617551     | -1773.224430     |         |
| TS1-1b               | -1498.738262 | -1498.797881 | 0.296878  | -1501.048474     | -1500.751596     | -157.58 |
| TS4-1b               | -1959.745537 | -1959.815336 | 0.401020  | -1962.237903     | -1961.836883     |         |
| INT8-1cd             | -1310.229684 | -1310.282994 | 0.290872  | -1312.446911     | -1312.156039     |         |
| TS7-1cd              | -1310.191840 | -1310.245105 | 0.291023  | -1312.498086     | -1312.207063     | -203.48 |
| INT9-1cd             | -1310.221455 | -1310.277073 | 0.289161  | -1312.440748     | -1312.151587     |         |
| TS8-1c               | -1498.770298 | -1498.828762 | 0.298817  | -1501.068095     | -1500.769278     | -287.95 |
| TS8-1d               | -1498.783309 | -1498.839431 | 0.301993  | -1501.080347     | -1500.778354     | -196.89 |
| INT5-1b              | -1498.820280 | -1498.877679 | 0.304010  | -1501.128174     | -1500.824164     |         |
| TS3-1b               | -1498.796762 | -1498.852991 | 0.304231  | -1501.091555     | -1500.787324     | -389.06 |
| 3                    | -868.526166  | -868.569341  | 0.203728  | -868.988979      | -868.785251      |         |
| INT1-1e              | -1596.525017 | -1596.590389 | 0.377519  | -1598.929683     | -1598.552164     |         |
| TS4-1e               | -1785.067899 | -1785.137215 | 0.386480  | -1787.559367     | -1787.172887     | -260.42 |
| INT6-1e              | -1785.114915 | -1785.181407 | 0.393931  | -1787.617899     | -1787.223968     |         |
| INT4-1e              | -1785.098983 | -1785.165437 | 0.392571  | -1787.589398     | -1787.196827     |         |
| INT4-1e'             | -1785.100997 | -1785.168007 | 0.391707  | -1787.591045     | -1787.199338     |         |

|           |              |              |          |              |              |         |
|-----------|--------------|--------------|----------|--------------|--------------|---------|
| TS5-1e    | -1785.074862 | -1785.135097 | 0.398988 | -1787.564430 | -1787.165442 | -328.50 |
| INT7-1e   | -1785.142978 | -1785.204668 | 0.400186 | -1787.631155 | -1787.230969 |         |
| TS6-1e    | -1785.118181 | -1785.179119 | 0.399228 | -1787.596209 | -1787.196981 | -389.55 |
| INT2-1e   | -1785.072237 | -1785.146461 | 0.380122 | -1787.554192 | -1787.174070 |         |
| TS1-1e    | -1785.044230 | -1785.116096 | 0.383591 | -1787.531962 | -1787.148371 | -249.63 |
| TS1-1e'   | -1785.051325 | -1785.124698 | 0.382063 | -1787.547264 | -1787.165201 | -186.38 |
| INT3-1e   | -1785.092373 | -1785.162753 | 0.388325 | -1787.587970 | -1787.199645 |         |
| TS2-1e    | -1785.071351 | -1785.136315 | 0.393618 | -1787.559548 | -1787.165930 | -253.71 |
| TS2-1e'   | -1785.075877 | -1785.141622 | 0.393099 | -1787.566361 | -1787.173262 | -236.59 |
| INT5-1e   | -1785.116505 | -1785.182146 | 0.395078 | -1787.595346 | -1787.200268 |         |
| TS3-1e    | -1785.100422 | -1785.164736 | 0.394791 | -1787.571996 | -1787.177205 | -363.66 |
| INT1-1f   | -1596.518033 | -1596.581768 | 0.378611 | -1598.921828 | -1598.543217 |         |
| TS4-1f    | -1785.055018 | -1785.121728 | 0.388451 | -1787.541868 | -1787.153417 | -220.76 |
| TS1-1f    | -1785.031853 | -1785.100990 | 0.385799 | -1787.515403 | -1787.129604 | -187.63 |
| INT8-1gh  | -1596.521063 | -1596.583782 | 0.380017 | -1598.917357 | -1598.537340 |         |
| INT8-1gh' | -1596.526667 | -1596.590158 | 0.379599 | -1598.928182 | -1598.548583 |         |
| TS7-1gh   | -1596.479069 | -1596.541559 | 0.380187 | -1598.875984 | -1598.495797 | -249.09 |
| TS7-1gh'  | -1596.489152 | -1596.551913 | 0.380462 | -1598.892262 | -1598.511800 | -200.79 |
| INT9-1gh  | -1596.523380 | -1596.586972 | 0.380409 | -1598.922054 | -1598.541645 |         |
| INT9-1gh' | -1596.518641 | -1596.583020 | 0.379324 | -1598.921435 | -1598.542111 |         |
| TS8-1g    | -1785.077498 | -1785.141805 | 0.393223 | -1787.550665 | -1787.157442 | -183.32 |
| TS8-1g'   | -1785.073771 | -1785.140694 | 0.389790 | -1787.553672 | -1787.163882 | -176.70 |
| TS8-1h    | -1785.081051 | -1785.146247 | 0.391772 | -1787.555634 | -1787.163862 | -227.46 |
| TS8-1h'   | -1785.081631 | -1785.149167 | 0.389019 | -1787.561957 | -1787.172938 | -195.65 |
| INT5-1f   | -1785.121490 | -1785.186301 | 0.395831 | -1787.601640 | -1787.205809 |         |
| INT7-1f   | -1785.145677 | -1785.208010 | 0.399267 | -1787.634244 | -1787.234977 |         |
| TS5-1f    | -1785.117751 | -1785.179896 | 0.398028 | -1787.594173 | -1787.196145 | -449.43 |
| 4         | -719.164883  | -719.212228  | 0.207901 | -719.595569  | -719.387668  |         |
| INT1-4a   | -1810.505456 | -1810.576452 | 0.416306 | -1812.954219 | -1812.537913 |         |
| TS4-4a    | -1999.043758 | -1999.116710 | 0.427580 | -2001.579063 | -2001.151483 | -243.94 |
| INT6-4a   | -1999.083092 | -1999.154721 | 0.433298 | -2001.627930 | -2001.194632 |         |
| INT3-4a   | -1538.071709 | -1538.137810 | 0.321828 | -1540.433105 | -1540.111277 |         |
| INT4-4a   | -1538.088522 | -1538.146776 | 0.330728 | -1540.436573 | -1540.081380 |         |
| TS2-4a    | -1538.066298 | -1538.122722 | 0.332509 | -1540.412436 | -1540.079927 | -255.01 |
| INT5-4a   | -1538.108841 | -1538.166088 | 0.333771 | -1540.457636 | -1540.123865 |         |
| TS3-4a    | -1538.087545 | -1538.143951 | 0.333749 | -1540.423962 | -1540.090213 | -347.98 |
| 5         | -907.809706  | -907.853131  | 0.233646 | -908.310191  | -908.076545  |         |
| 6         | -907.810930  | -907.855661  | 0.231805 | -908.314752  | -908.082947  |         |
| INT2-4a   | -1538.061188 | -1538.129393 | 0.315817 | -1540.404240 | -1540.088423 |         |
| TS1-4a    | -1538.037020 | -1538.101497 | 0.320876 | -1540.391812 | -1540.070936 | -205.35 |
| INT1-4b   | -1810.494158 | -1810.562379 | 0.419073 | -1812.942849 | -1812.523776 |         |
| TS1-4b    | -1538.023327 | -1538.085524 | 0.322668 | -1540.373680 | -1540.051012 | -157.43 |
| TS4-4b    | -1999.029889 | -1999.100343 | 0.429604 | -2001.562029 | -2001.132425 | -199.88 |
| INT8-4cd  | -1349.504751 | -1349.560686 | 0.316617 | -1351.760895 | -1351.444278 |         |

|                        |              |              |          |              |              |         |
|------------------------|--------------|--------------|----------|--------------|--------------|---------|
| TS7-4cd                | -1349.469730 | -1349.524255 | 0.319297 | -1351.730156 | -1351.410859 | -189.05 |
| INT9-4cd               | -1349.513122 | -1349.569120 | 0.318098 | -1351.771234 | -1351.453136 |         |
| TS8-4c                 | -1538.063169 | -1538.122706 | 0.327155 | -1540.398778 | -1540.071623 | -325.53 |
| TS8-4d                 | -1538.073106 | -1538.131065 | 0.329351 | -1540.410276 | -1540.080925 | -205.35 |
| INT5-4b                | -1538.106118 | -1538.163839 | 0.333214 | -1540.455603 | -1540.122389 |         |
| TS3-4b                 | -1538.081682 | -1538.138918 | 0.332837 | -1540.416851 | -1540.084014 | -395.02 |
| INT1-4e                | -1635.809503 | -1635.876940 | 0.404180 | -1638.254979 | -1637.850799 |         |
| TS4-4e                 | -1824.352965 | -1824.424696 | 0.412448 | -1826.885400 | -1826.472952 | -257.84 |
| INT6-4e                | -1824.399998 | -1824.468484 | 0.420477 | -1826.943380 | -1826.522903 |         |
| INT4-4e                | -1824.385392 | -1824.452589 | 0.421127 | -1826.911268 | -1826.490141 |         |
| INT4-4e'               | -1824.388650 | -1824.456282 | 0.420207 | -1826.916969 | -1826.496762 |         |
| TS2-4e                 | -1824.360457 | -1824.425843 | 0.422404 | -1826.887021 | -1826.464617 | -283.55 |
| TS2-4e'                | -1824.364052 | -1824.429300 | 0.423009 | -1826.890814 | -1826.467805 | -257.47 |
| INT7-4e                | -1824.430099 | -1824.492523 | 0.429116 | -1826.957442 | -1826.528326 |         |
| TS6-4e                 | -1824.404086 | -1824.46615  | 0.427703 | -1826.921003 | -1826.493300 | -386.73 |
| INT2-4e                | -1824.357552 | -1824.431188 | 0.409338 | -1826.879503 | -1826.470165 |         |
| TS1-4e                 | -1824.329242 | -1824.403148 | 0.410178 | -1826.857684 | -1826.447506 | -252.96 |
| INT3-4e                | -1824.377237 | -1824.448399 | 0.416406 | -1826.913471 | -1826.497065 |         |
| TS5-4e                 | -1824.352461 | -1824.415687 | 0.424171 | -1826.880884 | -1826.456713 | -299.43 |
| INT1-4f                | -1635.801946 | -1635.869173 | 0.403679 | -1638.246442 | -1637.842763 |         |
| TS1-4f                 | -1824.339665 | -1824.408294 | 0.415336 | -1826.867321 | -1826.451985 | -225.24 |
| TS4-4f                 | -1824.316411 | -1824.386682 | 0.413536 | -1826.841088 | -1826.427552 | -178.58 |
| INT8-4gh               | -1635.797520 | -1635.863509 | 0.404950 | -1638.362874 | -1637.957924 |         |
| INT8-4gh'              | -1635.801799 | -1635.866959 | 0.406445 | -1638.241251 | -1637.834806 |         |
| TS7-4gh                | -1635.762344 | -1635.824774 | 0.410266 | -1638.200796 | -1637.790530 | -79.05  |
| TS7-4gh'               | -1635.765376 | -1635.830426 | 0.407538 | -1638.210220 | -1637.802682 | -179.58 |
| INT9-4gh               | -1635.814319 | -1635.878627 | 0.409142 | -1638.252699 | -1637.843557 |         |
| INT9-4gh'              | -1635.810402 | -1635.876578 | 0.406807 | -1638.252332 | -1637.845525 |         |
| TS8-4g                 | -1824.365371 | -1824.431776 | 0.420247 | -1826.880182 | -1826.459935 | -231.04 |
| TS8-4g'                | -1824.359751 | -1824.430403 | 0.414699 | -1826.879868 | -1826.465169 | -319.59 |
| TS8-4h                 | -1824.371388 | -1824.438204 | 0.419381 | -1826.885341 | -1826.465960 | -215.63 |
| TS8-4h'                | -1824.371021 | -1824.4392   | 0.418017 | -1826.891543 | -1826.473526 | -208.86 |
| INT7-4e                | -1824.413681 | -1824.477938 | 0.426595 | -1826.935024 | -1826.508429 |         |
| INT7-4f                | -1824.407814 | -1824.474702 | 0.423107 | -1826.932119 | -1826.509012 |         |
| TS6-4e                 | -1824.376911 | -1824.442004 | 0.423995 | -1826.893842 | -1826.469847 | -365.62 |
| TS6-4f                 | -1824.390372 | -1824.45267  | 0.427588 | -1826.908446 | -1826.480858 | -431.19 |
| L2=PN                  | -747.276741  | -747.316472  | 0.172688 | -747.649458  | -747.476770  |         |
| NiL2                   | -916.578845  | -916.619005  | 0.173541 | -918.591827  | -918.418286  |         |
| Ni(L2) <sub>2</sub>    | -1663.883895 | -1663.951417 | 0.359392 | -1666.273225 | -1665.913833 |         |
| Ni(L2) <sub>2</sub> -1 | -1663.879767 | -1663.943369 | 0.363492 | -1666.260560 | -1665.897068 |         |
| Ni(L2) <sub>2</sub> -2 | -1663.886638 | -1663.947167 | 0.366244 | -1666.265648 | -1665.899404 |         |
| Ni(L2) <sub>2</sub> -3 | -1663.897574 | -1663.958157 | 0.366725 | -1666.278026 | -1665.911301 |         |
| Ni(L2) <sub>2</sub> -4 | -1663.898475 | -1663.955549 | 0.370222 | -1666.278606 | -1665.908384 |         |

## The coordinates of all stationary points (Å)

| Ni(COD) <sub>2</sub> |             |             | COD         |          |                                     |
|----------------------|-------------|-------------|-------------|----------|-------------------------------------|
| Ni                   | 0.00008700  | -0.00019300 | 0.00015700  | C        | -0.87309700 -1.63360600 -0.20854700 |
| C                    | 1.53780300  | 0.47059100  | -1.48151300 | C        | 0.39074000 -1.81376400 0.19254400   |
| C                    | 2.63624300  | -0.58340500 | -1.42080700 | C        | -0.39074000 1.81376400 -0.19254400  |
| C                    | 2.24542000  | -1.83708700 | -0.60252800 | C        | 1.26912000 -0.81582000 0.91607500   |
| C                    | 2.63612100  | 0.58355300  | 1.42081100  | C        | 0.87309700 1.63360600 0.20854700    |
| C                    | 1.39444800  | -1.53794400 | 0.61504800  | C        | 1.71931200 0.39152400 0.03045500    |
| C                    | 1.53768600  | -0.47051300 | 1.48151000  | H        | 0.86089300 -2.76724000 -0.04890000  |
| H                    | 1.00341700  | 0.53401200  | -2.42642100 | H        | 0.75613100 -0.42566300 1.80528800   |
| H                    | 3.55335400  | -0.14105000 | -1.01811200 | H        | -0.86089300 2.76724000 0.04890000   |
| H                    | 3.55327900  | 0.14122200  | 1.01821000  | H        | -1.34730200 -2.45289900 -0.74923000 |
| H                    | 3.15436100  | -2.39358400 | -0.31809500 | H        | 2.16058900 -1.33964500 1.27968700   |
| H                    | 2.88566800  | -0.89525300 | -2.44260800 | H        | 1.34730200 2.45289900 0.74923000    |
| H                    | 1.67322300  | -2.51441000 | -1.24947200 | H        | 2.75774200 0.64250700 0.27577800    |
| H                    | 2.88543100  | 0.89541900  | 2.44263400  | H        | 1.71838500 0.07278800 -1.02043800   |
| H                    | 0.78103600  | -2.36978000 | 0.95781900  | C        | -1.71931200 -0.39152400 -0.03045500 |
| H                    | 1.00376200  | -0.53431800 | 2.42665000  | H        | -1.71838500 -0.07278800 1.02043800  |
| C                    | 1.39438800  | 1.53792600  | -0.61507300 | H        | -2.75774200 -0.64250700 -0.27577800 |
| H                    | 0.78021800  | 2.36929500  | -0.95761000 | C        | -1.26912000 0.81582000 -0.91607500  |
| C                    | 2.24541100  | 1.83719600  | 0.60243900  | H        | -0.75613100 0.42566300 -1.80528800  |
| H                    | 3.15441500  | 2.39349300  | 0.31783700  | H        | -2.16058900 1.33964500 -1.27968700  |
| H                    | 1.67331600  | 2.51469000  | 1.24926200  |          |                                     |
| C                    | -1.53772700 | -0.47099700 | -1.48136400 | <b>I</b> |                                     |
| C                    | -2.63604600 | 0.58318000  | -1.42100300 | C        | 3.98183300 -0.67072100 0.07832700   |
| C                    | -2.24519800 | 1.83705300  | -0.60304000 | C        | 2.53475500 -0.14189400 -0.00227000  |
| C                    | -2.63644100 | -0.58290400 | 1.42060200  | H        | 4.14371900 -1.14506400 1.05697000   |
| C                    | -1.39452200 | 1.53827500  | 0.61482200  | H        | 4.12376100 -1.46328600 -0.67040700  |
| C                    | -1.53787400 | 0.47102300  | 1.48133800  | C        | 1.50569300 -1.27054800 0.21799500   |
| H                    | -1.00354800 | -0.53489600 | -2.42636400 | H        | 2.38742600 0.64109700 0.74933200    |
| H                    | -3.55328400 | 0.14105800  | -1.01833600 | H        | 2.36719800 0.32233700 -0.98007200   |
| H                    | -3.55331700 | -0.14056800 | 1.01736700  | H        | 1.66252000 -2.05947900 -0.53224600  |
| H                    | -3.15414000 | 2.39374400  | -0.31896400 | H        | 1.68464500 -1.74222500 1.19540800   |
| H                    | -2.88526000 | 0.89480500  | -2.44291900 | C        | 4.98281500 0.37641400 -0.12630500   |
| H                    | -1.67281100 | 2.51412600  | -1.25006400 | C        | 5.79465900 1.25385400 -0.29754600   |
| H                    | -2.88629900 | -0.89432600 | 2.44242600  | H        | 6.51393600 2.02606700 -0.44836300   |
| H                    | -0.78067600 | 2.36993500  | 0.95721100  | C        | 0.12164500 -0.80408200 0.14993700   |
| H                    | -1.00386200 | 0.53473900  | 2.42643700  | C        | -1.02564000 -0.39801900 0.08996800  |
| C                    | -1.39460400 | -1.53824700 | -0.61474500 | Si       | -2.76333100 0.19556200 -0.00199800  |
| H                    | -0.78070200 | -2.36988400 | -0.95706400 | C        | -3.90461800 -1.29695000 -0.22635000 |
| C                    | -2.24551000 | -1.83694900 | 0.60297100  | H        | -4.95425100 -0.98192600 -0.28278000 |
| H                    | -3.15438600 | -2.39367700 | 0.31877300  | H        | -3.66935200 -1.84267900 -1.14731100 |
| H                    | -1.67321600 | -2.51390100 | 1.25020300  | H        | -3.81071000 -1.99877100 0.61029900  |
|                      |             |             |             | C        | -2.93583500 1.36850500 -1.47560100  |

H -3.96396100 1.74298800 -1.55755300  
H -2.27136700 2.23451700 -1.37623800  
H -2.68771300 0.86398800 -2.41647900  
C -3.19285200 1.10098900 1.60206600  
H -4.22784600 1.46463000 1.57851600  
H -3.09007000 0.44108000 2.47116000  
H -2.53814700 1.96564700 1.76049000

#### CO<sub>2</sub>

C 0.00000000 0.00000000 0.00000000  
O 0.00000000 0.00000000 1.16958300  
O 0.00000000 0.00000000 -1.16958300

#### PMe<sub>3</sub>

P 0.00000000 0.00000000 0.60595600  
C 0.00000000 1.64353800 -0.28096300  
C -1.42334500 -0.82176900 -0.28096300  
C 1.42334500 -0.82176900 -0.28096300  
H -0.88358700 2.22041900 0.01454800  
H 0.00000000 1.53646600 -1.37309700  
H 0.88358700 2.22041900 0.01454800  
H -2.36473300 -0.34500000 0.01454800  
H -1.33061900 -0.76823300 -1.37309700  
H -1.48114600 -1.87541900 0.01454800  
H 1.33061900 -0.76823300 -1.37309700  
H 1.48114600 -1.87541900 0.01454800  
H 2.36473300 -0.34500000 0.01454800

#### Ni(PMe<sub>3</sub>)<sub>2</sub>

Ni -0.00004700 0.01053000 -0.03080100  
P 2.14414300 -0.00163800 -0.01772200  
C 2.99846900 0.92707100 1.34997700  
H 2.67591100 0.52987200 2.31769900  
H 4.09090200 0.85142700 1.27861000  
H 2.71081100 1.98253400 1.30874500  
C 2.98542800 -1.65545600 0.12177200  
H 4.07883100 -1.56293100 0.12478100  
H 2.66716800 -2.14873400 1.04574200  
H 2.68341700 -2.29016000 -0.71742800  
C 3.02370900 0.70118700 -1.49945800  
H 2.72731900 0.14825100 -2.39658100  
H 2.72738600 1.74597500 -1.63726700  
H 4.11456000 0.65053400 -1.39251100  
P -2.14424400 -0.00148500 -0.01800700

C -3.02261800 0.70302800 -1.49965700  
H -4.11356500 0.65277400 -1.39347300  
H -2.72572100 1.74779700 -1.63634800  
H -2.72588300 0.15074900 -2.39706900  
C -2.99902500 0.92627100 1.35004900  
H -2.71085900 1.98164100 1.31005700  
H -4.09144300 0.85119200 1.27788300  
H -2.67730100 0.52796200 2.31759400  
C -2.98622300 -1.65510400 0.11956700  
H -2.66874000 -2.14925500 1.04333800  
H -4.07959100 -1.56216000 0.12196900  
H -2.68392800 -2.28924500 -0.71995500

#### INT1-1a

Ni 2.47435900 0.23527100 -0.00005400  
C 0.87917600 1.24330000 0.00081100  
C 0.57268400 -0.00292300 0.00074100  
H 0.49935200 2.25541600 0.00119500  
C -0.53137900 -1.00366300 0.00090900  
H -0.43072100 -1.66370300 -0.87431600  
H -0.43080000 -1.66328500 0.87646200  
P 3.32264400 -1.80655300 -0.00032200  
P 4.08242000 1.75314800 -0.00017900  
C 2.80200900 -2.86631400 1.43331500  
H 1.70939400 -2.89274700 1.48294400  
H 3.18391500 -3.89114500 1.35115700  
H 3.16708500 -2.42354300 2.36571500  
C 2.80198900 -2.86633100 -1.43394100  
H 3.18381300 -3.89118800 -1.35172400  
H 1.70937200 -2.89268900 -1.48362700  
H 3.16714600 -2.42363000 -2.36634300  
C 5.15475400 -2.14131700 -0.00032900  
H 5.61317700 -1.68935900 0.88579300  
H 5.37698500 -3.21521800 -0.00019300  
H 5.61311900 -1.68960000 -0.88660200  
C 5.26662800 1.78006600 1.43397800  
H 5.80915400 0.83059400 1.48708700  
H 5.99259500 2.59826400 1.35388700  
H 4.70288200 1.89661600 2.36537600  
C 5.26951500 1.77801600 -1.43199700  
H 5.99519300 2.59645300 -1.35173000  
H 5.81230500 0.82855800 -1.48249100  
H 4.70765500 1.89300900 -2.36472900  
C 3.52877600 3.52331100 -0.00204300

H 2.90946600 3.70773300 0.88144500  
 H 4.37345000 4.22261000 -0.00170300  
 H 2.91124400 3.70644700 -0.88704600  
 C -1.93391900 -0.37173100 0.00069400  
 H -2.04304100 0.27307600 -0.87878500  
 H -2.04313900 0.27348800 0.87985900  
 C -3.05462000 -1.43452700 0.00087700  
 H -2.93913000 -2.08664300 0.87937300  
 H -2.93892000 -2.08716000 -0.87720800  
 C -4.39894800 -0.85895300 0.00053400  
 C -5.51116300 -0.36011100 0.00022200  
 Si -7.18782900 0.38661800 -0.00029700  
 C -8.47966100 -0.99647300 -0.00015100  
 H -8.37788800 -1.63473500 0.88511500  
 H -9.49632100 -0.58352000 -0.00051700  
 H -8.37748000 -1.63529600 -0.88496500  
 C -7.39040800 1.45619500 1.54758700  
 H -7.26939300 0.86216600 2.46077600  
 H -6.64703600 2.26125300 1.57319000  
 H -8.38558700 1.91761200 1.57724300  
 C -7.38982500 1.45531600 -1.54886600  
 H -6.64641300 2.26033200 -1.57466600  
 H -7.26851000 0.86076400 -2.46167400  
 H -8.38497600 1.91675500 -1.57913500

#### INT2-Ia

Ni -2.91841300 -0.74725900 -0.47665200  
 C -1.31021300 -1.72165200 -0.71424600  
 C -1.01679800 -0.55448900 -0.30408300  
 O -4.20804600 -2.04071300 1.74728400  
 O -4.54457100 -2.16457400 -0.56826300  
 C -4.15617000 -1.92023300 0.56207600  
 C -0.05300900 0.49435100 0.11544800  
 H -0.22526900 1.40915600 -0.46951100  
 H -0.25291800 0.76536100 1.16219200  
 H -1.00713300 -2.70668200 -1.03165700  
 P -4.08334700 1.15582900 -0.04904500  
 C -3.67866200 2.01166100 1.54057700  
 H -4.27507300 2.92117200 1.67667600  
 H -3.86880900 1.32822300 2.37397600  
 H -2.61659700 2.27512800 1.55596100  
 C -3.85622400 2.50513400 -1.29725100  
 H -4.41479300 3.40891300 -1.02772200  
 H -2.79347400 2.75418900 -1.37945500

H -4.19593800 2.15530200 -2.27729200  
 C -5.92757900 1.02055100 0.04845900  
 H -6.39874100 1.99638000 0.21195500  
 H -6.31329200 0.58467200 -0.87824300  
 H -6.19924100 0.35289600 0.87233600  
 C 1.41518200 0.05486100 -0.03239700  
 C 2.39403700 1.16226200 0.41471100  
 H 1.61553000 -0.21030200 -1.07645500  
 H 1.58795100 -0.84832700 0.56307800  
 H 2.21081700 2.07202800 -0.17596100  
 H 2.18641500 1.43239200 1.46056000  
 C 3.79746800 0.77351000 0.28350100  
 C 4.96118000 0.43115300 0.16722500  
 Si 6.72001500 -0.07670200 -0.00014100  
 C 7.81940400 1.45022600 0.19936200  
 H 8.87953600 1.18203000 0.10855900  
 H 7.59808900 2.20263900 -0.56636000  
 H 7.67605600 1.91957800 1.17942500  
 C 7.12388200 -1.34459300 1.34415800  
 H 6.97102700 -0.92493900 2.34510800  
 H 6.49012400 -2.23444900 1.25547200  
 H 8.16947700 -1.66989200 1.27360200  
 C 6.98175000 -0.84004400 -1.71087700  
 H 6.34709400 -1.72183200 -1.85576900  
 H 6.74506400 -0.12446900 -2.50670300  
 H 8.02510300 -1.15342900 -1.84201800

#### TSl-Ia

Ni 3.16165300 0.62362900 -0.00058200  
 C 1.29741100 1.66869800 0.01039200  
 C 1.36398400 0.34175500 0.01269900  
 H 0.36721100 2.23122500 0.01526100  
 C 0.36291200 -0.76409000 0.02211400  
 H 0.53698200 -1.41332900 -0.84950900  
 H 0.53658500 -1.39772300 0.90527600  
 O 1.99025800 3.97766200 0.00291900  
 O 3.74148300 2.53322000 -0.00747400  
 C 2.51503100 2.88159500 0.00053900  
 P 4.10973900 -1.28392300 -0.00645400  
 C 3.78047800 -2.38247600 1.43985300  
 H 2.71449300 -2.62343300 1.48791400  
 H 4.35436400 -3.31331100 1.36885000  
 H 4.05313900 -1.86169300 2.36252600  
 C 3.76857300 -2.37645000 -1.45462700

H 4.03487400 -1.85214200 -2.37716200  
 H 4.34193700 -3.30820000 -1.39179400  
 H 2.70200100 -2.61615200 -1.49587300  
 C 5.95033100 -1.13124200 -0.01370500  
 H 6.27254200 -0.57404400 0.87117700  
 H 6.43495600 -2.11430900 -0.01830800  
 H 6.26520000 -0.56935400 -0.89826300  
 C -1.10009400 -0.28553000 0.01715900  
 C -2.09386000 -1.46749700 0.02734200  
 H -1.28110800 0.33333000 -0.86863300  
 H -1.28226000 0.34929600 0.89134400  
 H -1.90461400 -2.11152100 -0.84398900  
 H -1.90976200 -2.09216400 0.91370700  
 C -3.48977000 -1.03243400 0.01805000  
 C -4.64413700 -0.64266100 0.00918500  
 Si -6.38501600 -0.04728500 -0.00715800  
 C -6.57427400 1.32789600 1.27709100  
 H -5.91240400 2.17313000 1.05634100  
 H -7.60445500 1.70533400 1.29357800  
 H -6.33314300 0.96978100 2.28452900  
 C -7.52960000 -1.49260700 0.41611500  
 H -7.43221100 -2.30532300 -0.31285400  
 H -7.30265300 -1.90357200 1.40655700  
 H -8.57852100 -1.17055000 0.41990500  
 C -6.78794700 0.61643900 -1.73166900  
 H -6.12836000 1.44923800 -2.00123200  
 H -6.67303500 -0.16119600 -2.49551000  
 H -7.82206700 0.98047400 -1.77729000

#### INT3-1a

Ni 3.36188600 0.64000000 0.00106000  
 O 3.47324700 2.43183500 0.00283700  
 O 2.23420200 4.31441700 0.00217400  
 C 2.31637800 3.10010600 0.00062700  
 C 1.16114400 2.15815200 -0.00415600  
 C 1.48010700 0.85480000 -0.00535100  
 H 0.14556600 2.55140900 -0.00663900  
 C 0.53632800 -0.31468700 -0.01093600  
 H 0.74361300 -0.94193600 -0.89195100  
 H 0.74350400 -0.95055400 0.86387600  
 P 3.81831800 -1.57501000 0.00255100  
 C 3.30795900 -2.60378400 -1.44461500  
 H 3.71205000 -3.61941300 -1.36988500  
 H 2.21694500 -2.65903900 -1.49756700

H 3.66921400 -2.14053800 -2.36777900  
 C 5.66091700 -1.77210900 0.00431300  
 H 6.08579900 -1.28985100 0.89050500  
 H 5.94686600 -2.82979200 0.00575300  
 H 6.08726000 -1.29181600 -0.88223600  
 C 3.30562000 -2.60014300 1.45152800  
 H 2.21449900 -2.65529100 1.50285400  
 H 3.70985700 -3.61596300 1.38013700  
 H 3.66527200 -2.13447200 2.37409600  
 C -0.95759900 0.05672000 -0.00897900  
 C -1.85792000 -1.19838900 -0.01467800  
 H -1.18965900 0.67102600 -0.88577900  
 H -1.18913400 0.66282400 0.87365900  
 H -1.62434900 -1.81176900 -0.89745600  
 H -1.62153800 -1.82164100 0.86041300  
 C -3.28437100 -0.87689600 -0.01035900  
 C -4.46750700 -0.58542500 -0.00614100  
 Si -6.25315600 -0.14415200 0.00300400  
 C -7.27095600 -1.72291400 0.23040600  
 H -8.34415900 -1.49510700 0.24895000  
 H -7.09374500 -2.43252200 -0.58594700  
 H -7.01984700 -2.22635000 1.17107100  
 C -6.58212000 1.04934600 1.43256400  
 H -6.33145600 0.59389800 2.39749700  
 H -5.98798300 1.96479700 1.33158600  
 H -7.64009900 1.33874200 1.46360300  
 C -6.69186500 0.67783600 -1.64273300  
 H -6.10517900 1.59001900 -1.80061300  
 H -6.49947100 0.00691900 -2.48786300  
 H -7.75348200 0.95401100 -1.66932500

#### INT4-1a

Ni 0.56791700 -0.15350100 0.09957100  
 O 1.99629500 0.45042000 -0.90839500  
 O 3.66922900 -0.25127600 -2.23398100  
 C 2.73950700 -0.50312900 -1.48614600  
 C 2.30667000 -1.86649300 -1.07576700  
 C 1.24115600 -1.92036000 -0.26420100  
 H 2.88423600 -2.72986500 -1.41041400  
 C 0.75417700 -3.17089400 0.41674300  
 H 1.39325600 -4.02114100 0.13665900  
 H -0.26975100 -3.42637700 0.10629200  
 P 0.50574800 2.17729900 0.64904200  
 C 0.79199200 -2.99709100 1.94958700



C -0.31761800 -2.04369000 2.49021200  
 H 1.77469900 -2.60040100 2.22619100  
 H 0.68240200 -3.96602200 2.44994300  
 H -1.18112500 -2.63268600 2.82936500  
 H 0.04429900 -1.49118500 3.36527800  
 C -0.81498400 -1.12249700 1.45911500  
 C -1.45307300 -0.58795400 0.54179000  
 C -0.67082700 2.97365900 1.83975600  
 H -1.69641400 2.91119300 1.46537000  
 H -0.62979300 2.44392400 2.79733600  
 H -0.41985200 4.02682000 2.00983100  
 C 0.47733800 3.30126200 -0.81605400  
 H 1.21201200 2.91910200 -1.53020900  
 H -0.50999800 3.28593000 -1.28940900  
 H 0.72508900 4.33399600 -0.54529400  
 C 2.14575700 2.55555800 1.41006800  
 H 2.23042400 2.05169300 2.37867800  
 H 2.91659000 2.16104900 0.74366500  
 H 2.28729800 3.63262700 1.55496300  
 Si -2.71650600 -0.18567100 -0.77093200  
 C -3.47413300 1.51615300 -0.45153900  
 H -2.74288700 2.32099800 -0.58216300  
 H -4.29119900 1.69819900 -1.16089100  
 H -3.88934300 1.59209100 0.55995900  
 C -1.87351900 -0.23980900 -2.45496100  
 H -1.06285300 0.49384000 -2.52556700  
 H -1.43530500 -1.22565300 -2.64536200  
 H -2.59530300 -0.02847000 -3.25411800  
 C -4.05335300 -1.51619400 -0.63288000  
 H -4.53170900 -1.50410000 0.35318400  
 H -4.83453800 -1.35529000 -1.38633400  
 H -3.63578200 -2.51661900 -0.79285300

#### TS2-1a

Ni 0.66664900 -0.00715500 -0.01582900  
 O 2.44616500 -0.20742000 -0.62332700  
 O 4.35337400 0.97550700 -0.83135700  
 C 3.19222000 0.86761900 -0.46380900  
 C 2.47653800 1.95908200 0.26347800  
 C 1.15440400 1.94289500 0.50911700  
 H 3.09211800 2.76356100 0.67081600  
 C 0.50218800 3.03387800 1.32543700  
 H 1.27002800 3.64968800 1.80796200  
 H -0.10099900 2.58237300 2.12324800

P 0.80512000 -2.24294600 0.21827300  
 C -0.40291300 3.87933200 0.39646600  
 C -0.81293500 2.96687700 -0.78977500  
 H 0.13832300 4.75498900 0.02509700  
 H -1.28575900 4.24185300 0.93307700  
 H -1.85844900 3.10945800 -1.08200900  
 H -0.19045700 3.17587500 -1.66724900  
 C -0.61688900 1.54857600 -0.37115700  
 C -1.21353400 0.44261000 -0.07373500  
 Si -2.96200200 -0.20087000 -0.13150200  
 C -4.15117000 1.22006200 -0.53816400  
 H -3.93810000 1.65845000 -1.52023000  
 H -5.18748500 0.85929500 -0.55782400  
 H -4.09655800 2.02160300 0.20800200  
 C -3.11814800 -1.50602800 -1.49571000  
 H -2.43858800 -2.35348800 -1.35582300  
 H -4.14044300 -1.90266700 -1.53489000  
 H -2.89499200 -1.06564000 -2.47479200  
 C -3.43999700 -0.91145500 1.55657700  
 H -4.47588500 -1.27304300 1.54322400  
 H -2.79858900 -1.74644100 1.85566700  
 H -3.36791500 -0.14274900 2.33524800  
 C -0.49380400 -3.34154500 0.94152200  
 H -0.72581200 -3.01263800 1.95924600  
 H -1.41235500 -3.30324200 0.35121700  
 H -0.14125700 -4.37861200 0.97881700  
 C 1.20859900 -3.03494500 -1.39556600  
 H 2.03351900 -2.46881900 -1.83606600  
 H 1.49938300 -4.08372800 -1.26818600  
 H 0.34575500 -2.97819000 -2.06645700  
 C 2.26812700 -2.64406800 1.26705900  
 H 2.09220200 -2.30910800 2.29435200  
 H 2.46877300 -3.72167600 1.27106300  
 H 3.12613500 -2.10245300 0.86365100

#### INT5-1a

Ni 0.66304400 -0.22668400 0.00176600  
 O 0.85137800 1.47333200 -0.58087300  
 O 1.01863300 3.66174000 -0.38451600  
 C 0.31709000 2.65082000 -0.31848500  
 C -1.11820300 2.81481600 0.01153100  
 C -2.13375800 1.93930500 0.17541300  
 H -1.35556400 3.87023200 0.12824500  
 C -3.54329400 2.43990700 0.47513100

H -3.73966400 3.42689900 0.04545000  
 H -3.67801000 2.52676900 1.56445200  
 P 3.07428200 -0.13227500 0.16859700  
 C -4.45534500 1.33047500 -0.06940200  
 C -3.66240100 0.05217100 0.24849900  
 H -4.56702200 1.44107300 -1.15534300  
 H -5.45713700 1.33617600 0.37255700  
 H -3.86008000 -0.26114800 1.28422800  
 H -3.92809500 -0.79046300 -0.39803800  
 C -2.18505500 0.46134000 0.10771400  
 C -1.16725000 -0.41597800 -0.00278900  
 Si -1.27046600 -2.29621400 -0.09997800  
 C -2.22685100 -3.06332200 1.34717800  
 H -3.28639200 -2.78703400 1.33090100  
 H -2.16633300 -4.15868000 1.30873600  
 H -1.81277400 -2.73817900 2.30884800  
 C -1.96400300 -2.89145000 -1.75979200  
 H -3.00795600 -2.58724400 -1.89650100  
 H -1.38689600 -2.47635000 -2.59401000  
 H -1.92348900 -3.98587000 -1.83128400  
 C 0.52815700 -2.94902000 0.03085600  
 H 1.07402800 -2.60420800 0.92062000  
 H 0.47448000 -4.04275700 0.12044300  
 H 1.13926700 -2.73592200 -0.85491600  
 C 4.21048700 -1.45131200 0.81012500  
 H 3.96321800 -1.67900100 1.85256000  
 H 4.08760200 -2.36859000 0.22456200  
 H 5.25998300 -1.13974300 0.75965700  
 C 3.54665900 1.34700100 1.16641600  
 H 4.62578700 1.53284200 1.12020900  
 H 3.00575100 2.21177300 0.76929200  
 H 3.25473000 1.20181400 2.21184500  
 C 3.79587700 0.26277000 -1.48551900  
 H 3.22027600 1.09142700 -1.90709000  
 H 4.85075900 0.54967100 -1.40934300  
 H 3.70783300 -0.60093300 -2.15293800

# **TS3-1a**

Ni -0.86409500 -0.26555600 -0.79588500  
 O 0.71287500 -0.15350200 -1.77469100  
 O 1.34247400 -1.73903300 -3.23769100  
 C 1.20492800 -1.41103100 -2.07114100  
 C 1.60464100 -2.24413500 -0.93548100  
 C 1.78357300 -1.76673600 0.33084500

H 1.93825800 -3.24215500 -1.20432600  
 C 2.48551200 -2.48237700 1.46835400  
 H 3.19336900 -3.24534500 1.12887700  
 H 1.74496200 -2.98616300 2.10825500  
 P -2.65390500 -0.49466800 0.43212000  
 C 3.15788300 -1.32425000 2.23993800  
 C 2.19587300 -0.12468300 2.06225400  
 H 4.12153700 -1.09120300 1.77147200  
 H 3.34958500 -1.56349000 3.29125600  
 H 1.46625300 -0.09385100 2.88521800  
 H 2.72017700 0.83778900 2.07316800  
 C 1.49793600 -0.41388700 0.73504200  
 C 0.72811500 0.44176600 -0.00695000  
 Si 0.76682400 2.33860800 -0.08413900  
 C 0.12689200 3.01808300 1.57052900  
 H 0.12709600 4.11548200 1.55770500  
 H -0.90109000 2.69136200 1.76888200  
 H 0.74733500 2.69782400 2.41537500  
 C 2.54430900 2.92713800 -0.37603000  
 H 2.58452500 4.02097200 -0.45559600  
 H 3.21998300 2.62731800 0.43329100  
 H 2.93621200 2.50838800 -1.30999100  
 C -0.32520200 2.95146400 -1.49723500  
 H -0.25672700 4.04314100 -1.58958200  
 H -0.00822500 2.50680500 -2.44648000  
 H -1.37849500 2.68984600 -1.34360500  
 C -3.76744500 0.97001700 0.65625000  
 H -3.21003300 1.79281600 1.11485000  
 H -4.12710500 1.30988900 -0.32007600  
 H -4.62886200 0.72820900 1.28959300  
 C -2.35118400 -1.01656400 2.18151700  
 H -3.28853700 -1.14096900 2.73562500  
 H -1.80125900 -1.96249000 2.18731700  
 H -1.73393400 -0.26547200 2.68378500  
 C -3.84433300 -1.78571000 -0.16054200  
 H -3.33580800 -2.75323400 -0.21638000  
 H -4.71185700 -1.87456300 0.50395000  
 H -4.19144800 -1.53012600 -1.16671000

# **2**

O -1.03494800 2.40381800 0.03796500  
 O 1.19005900 2.42842800 0.08136400  
 C 0.20098700 1.72417100 0.03717800  
 C 0.17897200 0.26019600 -0.00775300

C -1.04771100 -0.35071200 -0.05813200  
 C -1.41011700 -1.82578600 -0.10930700  
 H -0.77169900 -2.44995400 0.51851100  
 H -1.29553800 -2.18905700 -1.14103700  
 C -2.89700800 -1.86375800 0.31694700  
 C -3.48022500 -0.50978000 -0.15473700  
 H -2.95987000 -1.92679200 1.40990900  
 H -3.43317800 -2.72408900 -0.09439700  
 H -3.84008000 -0.58794600 -1.19065700  
 H -4.32574600 -0.17404900 0.45483500  
 C -2.27911400 0.40500400 -0.07849500  
 C -2.21300300 1.74962500 -0.02468400  
 H -3.05693700 2.43248900 -0.02002700  
 Si 1.92620900 -0.51240500 -0.00677900  
 C 1.87393500 -2.40978800 -0.06995900  
 H 2.90530000 -2.77803900 -0.14746300  
 H 1.44306000 -2.85487700 0.83424000  
 H 1.32659900 -2.79830000 -0.93608600  
 C 2.82693000 -0.00483300 1.57715000  
 H 2.31564500 -0.38672800 2.46931600  
 H 3.84890800 -0.40444800 1.58492400  
 H 2.88304700 1.08471300 1.65540900  
 C 2.84994600 0.09516000 -1.54207600  
 H 2.36152000 -0.24271900 -2.46429300  
 H 2.89199900 1.18806300 -1.55790400  
 H 3.87761300 -0.28955900 -1.55179900

#### TS4-1a

Ni -2.23817200 -0.01662900 -0.02616500  
 C -0.63812100 -1.03692300 0.71888400  
 C -0.43258500 0.21912900 0.37190100  
 H 0.00497400 -1.90595100 0.61871400  
 O -2.03732800 -2.74385500 1.90096700  
 O -2.47555700 -0.55968000 2.44207800  
 C -1.95786300 -1.52564300 1.88230000  
 P -3.03265200 2.03188100 -0.05619300  
 P -3.78990000 -1.47281500 -0.85652500  
 C 0.70067800 1.16359300 0.18365100  
 H 0.66135100 1.89589600 1.00711600  
 H 0.55671800 1.74716700 -0.73661300  
 C 2.08910400 0.49891200 0.16895200  
 H 2.23909300 -0.05950300 1.09928600  
 H 2.14072800 -0.22752400 -0.65011400  
 C 3.21838100 1.53889600 0.00079100

H 3.17891900 2.25642300 0.83351400  
 H 3.04062800 2.12482100 -0.91318900  
 C 4.55046500 0.93955600 -0.06258000  
 C 5.65354100 0.42466900 -0.11832500  
 Si 7.32320400 -0.33873300 -0.21025500  
 C 7.46221600 -1.31753200 -1.82341500  
 H 8.45045000 -1.78615900 -1.91194100  
 H 6.70942700 -2.11268700 -1.87220900  
 H 7.31994900 -0.66945800 -2.69590800  
 C 7.55843400 -1.49348500 1.26868900  
 H 8.54847000 -1.96579000 1.24081400  
 H 7.47354900 -0.94992300 2.21662600  
 H 6.80709100 -2.29143300 1.27373600  
 C 8.62420400 1.03471700 -0.17524600  
 H 8.55700100 1.62319000 0.74701400  
 H 9.63684300 0.61599000 -0.23240100  
 H 8.49836500 1.72225500 -1.01953400  
 C -4.86308100 2.28537000 -0.20421400  
 H -5.37320300 1.70296600 0.56956400  
 H -5.13119900 3.34158600 -0.08551000  
 H -5.21399400 1.94220400 -1.18234800  
 C -2.39417000 3.23109800 -1.31500800  
 H -1.30341300 3.28431300 -1.25048700  
 H -2.65637300 2.88518100 -2.32002300  
 H -2.80881300 4.23458500 -1.16394200  
 C -2.67282500 2.87820500 1.54597600  
 H -3.17373300 3.85033300 1.61951700  
 H -2.99424500 2.22430500 2.36151800  
 H -1.59256200 3.01968400 1.64464300  
 C -5.12373200 -2.02961600 0.29552200  
 H -5.73532300 -1.17597600 0.60396200  
 H -5.76740100 -2.78522700 -0.16985800  
 H -4.64777000 -2.45208800 1.18509900  
 C -4.73110600 -1.04674300 -2.39639900  
 H -5.33886500 -1.89242200 -2.73812700  
 H -5.39245500 -0.19404400 -2.21278200  
 H -4.03108600 -0.77171300 -3.19217900  
 C -2.98474700 -3.06943300 -1.31729600  
 H -2.23610700 -2.89340000 -2.09635000  
 H -2.48008900 -3.45096200 -0.42450300  
 H -3.71438500 -3.80509300 -1.67561000

#### INT6-1a

Ni -2.39694400 0.16916600 -0.05598100

O -2.48302600 2.00689700 -0.33982800  
 O -1.24022600 3.78922600 -0.90415600  
 C -1.32244100 2.60698000 -0.60950000  
 C -0.17386800 1.67851500 -0.47075200  
 C -0.45232500 0.39936000 -0.16456100  
 H 0.82649500 2.09606400 -0.57429600  
 C 0.63535800 -0.59779100 0.17144000  
 H 0.47219800 -0.94395300 1.20514100  
 H 0.53904700 -1.50014200 -0.44988800  
 P -2.41854800 -2.06812100 -0.27404400  
 C -1.59874200 -3.18075600 0.95901700  
 H -1.69602200 -4.23048800 0.65976500  
 H -0.54080800 -2.93424100 1.05976900  
 H -2.07473200 -3.04588200 1.93582200  
 C -4.07058900 -2.89789400 -0.40093100  
 H -4.68058700 -2.40238400 -1.16206800  
 H -3.95006700 -3.95150400 -0.67713500  
 H -4.59853200 -2.84358400 0.55450900  
 C -1.68777100 -2.58249600 -1.89568000  
 H -0.66477600 -2.21499900 -1.99615500  
 H -1.69614200 -3.67294700 -2.00507300  
 H -2.28116000 -2.13959800 -2.70200700  
 C 2.08589500 -0.10010400 0.05535900  
 C 3.09995200 -1.20393000 0.43004400  
 H 2.24000300 0.76417300 0.71025700  
 H 2.28681100 0.23912200 -0.96726100  
 H 2.90164200 -1.54923600 1.45563300  
 H 2.94587600 -2.07882600 -0.21923100  
 C 4.49183800 -0.76692500 0.32795000  
 C 5.64471300 -0.38264300 0.23579300  
 Si 7.38102400 0.20139300 0.09732200  
 C 8.54654200 -1.23595700 0.49424500  
 H 9.59498000 -0.92019500 0.42196600  
 H 8.38045300 -1.61414900 1.50955600  
 H 8.40029200 -2.07092600 -0.20068500  
 C 7.68808700 0.81092200 -1.66694600  
 H 7.52390400 0.01171300 -2.39892700  
 H 7.01841000 1.63996200 -1.92284800  
 H 8.71998200 1.16533800 -1.78387900  
 C 7.65759700 1.61266500 1.32619500  
 H 6.98834000 2.45584600 1.12029300  
 H 7.47412800 1.28578600 2.35620900  
 H 8.68928100 1.98240400 1.27074900  
 P -4.66810500 0.67467400 0.44481000

C -5.45837100 1.63850800 -0.91579700  
 H -6.37673900 2.13242800 -0.57850100  
 H -4.72944900 2.38171800 -1.24608000  
 H -5.69687000 0.97656300 -1.75517100  
 C -6.06067000 -0.42558200 0.99961300  
 H -5.75645300 -1.01602100 1.87048600  
 H -6.93322200 0.17582800 1.27934000  
 H -6.35767700 -1.11272200 0.20226100  
 C -4.59353300 1.88385800 1.83822200  
 H -4.25928200 1.38033800 2.75143900  
 H -3.86172500 2.64778300 1.56797400  
 H -5.57171300 2.34293300 2.02113100

# **TS5-1a**

Ni -0.46672000 0.02516100 -0.13096400  
 O -0.54960200 -0.40723300 2.04056400  
 O -0.22720400 0.92182600 3.85061200  
 C -0.50042300 0.72619400 2.66279100  
 C -0.83861600 1.91672300 1.79571800  
 C -0.72580100 1.97184400 0.45201000  
 H -1.18939500 2.80386800 2.33085300  
 C -1.03355700 3.26153100 -0.28258800  
 H -1.64327600 3.91653300 0.35198800  
 H -1.59680300 3.07810300 -1.20380500  
 P -0.16882400 -2.25605000 -0.02079400  
 C 0.29572000 3.91889500 -0.65930400  
 C 1.10557100 2.80755600 -1.32593700  
 H 0.80644800 4.26524200 0.24691300  
 H 0.16726700 4.77786800 -1.32804900  
 H 0.73609500 2.64500000 -2.34925100  
 H 2.17003100 3.04937800 -1.40458300  
 C 0.96498100 1.51870500 -0.57180800  
 C 1.54750200 0.40738600 -0.32660300  
 P -2.67477100 -0.04705700 -0.77103900  
 Si 3.34445400 -0.10206700 -0.37143900  
 C 4.35498900 1.33282900 -1.09936600  
 H 5.41880200 1.06207200 -1.11183000  
 H 4.06424400 1.56774700 -2.12989200  
 H 4.25885800 2.24600200 -0.50075200  
 C 3.64902300 -1.58430900 -1.51769700  
 H 4.73016800 -1.73279000 -1.63555900  
 H 3.22935500 -2.52873500 -1.15920400  
 H 3.23578100 -1.38964800 -2.51514800  
 C 3.99483700 -0.40555000 1.37744000

H 5.06043000 -0.66753200 1.34783800  
 H 3.89199300 0.50857200 1.97383100  
 H 3.46314800 -1.19789900 1.91042700  
 C 1.18357300 -2.78283400 1.11437000  
 H 2.16474000 -2.58421700 0.68694500  
 H 1.05717800 -2.19855200 2.02929200  
 H 1.10138300 -3.85431200 1.33081400  
 C 0.10590800 -3.30073900 -1.52933600  
 H 0.22310400 -4.35908300 -1.26843400  
 H -0.73830800 -3.19868900 -2.21807900  
 H 1.00611200 -2.96241100 -2.05046600  
 C -1.56311500 -3.12539500 0.83449600  
 H -2.50019900 -3.08474900 0.27561000  
 H -1.30509100 -4.17729400 1.00145700  
 H -1.69230300 -2.62154300 1.79600700  
 C -3.79956100 -0.26381400 0.67901500  
 H -3.62714300 0.57027100 1.36518100  
 H -4.85180200 -0.27715300 0.37271800  
 H -3.56076200 -1.18164800 1.21794200  
 C -3.50307500 1.39005800 -1.60489600  
 H -4.52734800 1.11337200 -1.87937100  
 H -3.54526000 2.24901100 -0.93262100  
 H -2.96256100 1.67806500 -2.51162400  
 C -3.22575500 -1.36689200 -1.96062400  
 H -2.76250500 -1.17849000 -2.93524600  
 H -2.92644800 -2.36348100 -1.63219100  
 H -4.31497100 -1.35170800 -2.08259900

#### INT7-1a

Ni -0.57614500 0.00382200 0.05747700  
 O -0.45679900 1.51818100 1.16659000  
 O -0.79240900 3.71025000 0.93039000  
 C -0.21906000 2.67271300 0.58210200  
 C 0.79226600 2.79045900 -0.51888100  
 C 1.81952100 1.97037200 -0.83562200  
 H 0.75879400 3.77227000 -0.98699200  
 C 2.98777800 2.39843200 -1.70468200  
 H 3.01417100 3.47501600 -1.89930200  
 H 2.95219500 1.88395700 -2.67826600  
 P -0.68342900 -1.37185400 -1.70616700  
 C 4.19651300 1.88696800 -0.89210300  
 C 3.70821200 0.54942300 -0.28971600  
 H 4.41444200 2.60091300 -0.08872800  
 H 5.10516100 1.77771900 -1.49403400

H 3.98655100 -0.28781700 -0.94491200  
 H 4.16102600 0.34630100 0.68708700  
 C 2.17223800 0.67179800 -0.21792300  
 C 1.30943900 -0.24210600 0.27024400  
 P -2.92711400 0.32050900 0.48284100  
 Si 1.75723400 -1.62659800 1.47005600  
 C 2.59888500 -0.89724200 3.00752400  
 H 3.56813300 -0.44028900 2.77936700  
 H 1.96490300 -0.12065200 3.45094000  
 H 2.76689900 -1.67285100 3.76590400  
 C 2.89812100 -2.95198000 0.70967600  
 H 2.40205200 -3.51767700 -0.08916200  
 H 3.81056500 -2.51469200 0.28902800  
 H 3.20226300 -3.67649500 1.47646100  
 C 0.18691400 -2.50623600 2.08053800  
 H 0.44183800 -3.26637800 2.83049400  
 H -0.49743900 -1.79152600 2.55256100  
 H -0.36139300 -3.00914000 1.27570800  
 C 0.88470100 -1.79320700 -2.58599700  
 H 0.68052700 -2.34765200 -3.50905000  
 H 1.42188700 -0.87133000 -2.82412000  
 H 1.52881600 -2.39306500 -1.93853700  
 C -1.50308300 -3.02891700 -1.58211800  
 H -2.50512100 -2.91813100 -1.15840300  
 H -1.58115000 -3.50872400 -2.56419400  
 H -0.92403600 -3.67831100 -0.91827200  
 C -1.64735300 -0.55693400 -3.06270800  
 H -1.67773000 -1.18044900 -3.96354800  
 H -2.67046200 -0.36064600 -2.73055200  
 H -1.18143800 0.40258300 -3.30766800  
 C -3.55452100 2.00268800 0.04787300  
 H -2.86499500 2.75354300 0.44852000  
 H -3.59953300 2.11606600 -1.04084200  
 H -4.55693700 2.16419400 0.46157400  
 C -4.35096200 -0.76605600 -0.02556200  
 H -4.46319400 -0.77469700 -1.11520100  
 H -4.17730100 -1.79441400 0.30976600  
 H -5.29230800 -0.41479500 0.41301400  
 C -3.08580900 0.29606200 2.32229100  
 H -2.90516000 -0.71543800 2.70136300  
 H -2.32177100 0.96734000 2.72143600  
 H -4.08048500 0.62591700 2.64288300

#### TS6-1a

Ni 0.67812400 0.11484300 0.09318300  
 O -0.08468800 -1.63782700 -0.00444000  
 O 0.80515100 -2.95768900 -1.57898700  
 C 0.00245800 -2.05611700 -1.31639400  
 C -0.89670200 -1.45928500 -2.27748300  
 C -1.93664800 -0.61664200 -1.94164200  
 H -0.84016700 -1.88869800 -3.27357400  
 C -3.11225500 -0.26910000 -2.83596000  
 H -3.32316800 -1.03567300 -3.58960300  
 H -2.91395700 0.66861000 -3.37857900  
 P 0.68386500 2.29469100 -0.27801300  
 C -4.26782200 -0.07773300 -1.82774400  
 C -3.59013500 0.43049100 -0.53080200  
 H -4.73527100 -1.05029700 -1.63228900  
 H -5.05062600 0.59654200 -2.19297000  
 H -3.61024900 1.53181300 -0.49202000  
 H -4.11789000 0.08476200 0.36672300  
 C -2.16042900 -0.09804200 -0.64050800  
 C -1.20018200 -0.17986400 0.36302600  
 Si -1.58664500 -0.45730600 2.21027100  
 C -2.49280100 1.04215200 2.95047500  
 H -2.76851700 0.82295100 3.99044300  
 H -1.86337200 1.93883000 2.96277900  
 H -3.41485700 1.28600700 2.41154100  
 C -2.67289800 -1.99779400 2.39400600  
 H -2.87013200 -2.21997600 3.45054300  
 H -3.63943700 -1.87864400 1.89108200  
 H -2.17215500 -2.86571400 1.95096400  
 C 0.01393400 -0.71595100 3.18807700  
 H -0.20826800 -0.86648600 4.25261700  
 H 0.54983300 -1.59923200 2.82568100  
 H 0.68556500 0.14700300 3.10324800  
 C -0.39823200 3.38143700 0.75909300  
 H -1.42198800 2.99844400 0.73424700  
 H -0.05473500 3.36760300 1.79841900  
 H -0.39238800 4.41617800 0.39744500  
 C 0.03613200 2.63392100 -1.97745000  
 H -0.08503500 3.70803900 -2.15939400  
 H 0.72139700 2.21674700 -2.72152900  
 H -0.92773000 2.12940100 -2.09021200  
 C 2.26467600 3.26582200 -0.27580700  
 H 2.97213300 2.82044200 -0.98238700  
 H 2.09555400 4.31080500 -0.56041300  
 H 2.71660800 3.23970100 0.72100300

P 2.93711800 -0.62985000 0.01666000  
 C 4.35641700 0.26781700 0.81219400  
 H 4.14605300 0.41976600 1.87635400  
 H 5.28954100 -0.30009600 0.71810600  
 H 4.49684900 1.24977300 0.34971500  
 C 3.58382400 -0.95612900 -1.68805100  
 H 4.57905500 -1.41560500 -1.66083800  
 H 2.88424000 -1.63919600 -2.17973100  
 H 3.63706900 -0.02597700 -2.26410500  
 C 3.06466100 -2.30662800 0.78168300  
 H 2.34707200 -2.94973900 0.26325200  
 H 4.07769400 -2.71522300 0.68669700  
 H 2.79440100 -2.25478900 1.84129700

# **INT1-1b**

Ni 0.92727500 -0.31421700 0.03003200  
 C -0.60469100 0.90894400 0.16219800  
 C -0.95871300 -0.32735200 0.25017600  
 C -2.09886300 -1.27489300 0.42997200  
 H -1.88992900 -2.22130800 -0.08844000  
 H -2.17078700 -1.53649900 1.49765200  
 P 1.40742700 -2.47816600 0.07281400  
 P 2.80078400 0.87613700 -0.21079300  
 C 0.72202500 -3.41559000 1.52496300  
 H -0.35945600 -3.26913400 1.58683700  
 H 0.93580700 -4.48921800 1.45484400  
 H 1.16526400 -3.02562700 2.44728300  
 C 0.71356500 -3.45567600 -1.34868500  
 H 0.88851400 -4.53205900 -1.23098400  
 H -0.36183600 -3.27491200 -1.43477200  
 H 1.18195400 -3.12010300 -2.27979800  
 C 3.14173700 -3.15823000 0.08504800  
 H 3.68710500 -2.77225300 0.95295800  
 H 3.14158800 -4.25391200 0.13156100  
 H 3.67464200 -2.84622300 -0.81810600  
 C 3.46033000 1.62414500 1.35813500  
 H 3.70922300 0.82424200 2.06358400  
 H 4.35650600 2.23056200 1.17882800  
 H 2.69047600 2.24827300 1.81998100  
 C 4.36225100 0.09378900 -0.85851900  
 H 5.17100200 0.82902000 -0.94723800  
 H 4.68989300 -0.70583800 -0.18834600  
 H 4.17636200 -0.34320300 -1.84556100  
 C 2.75680700 2.36025000 -1.32804700

H 1.97537300 3.05008000 -1.00304700  
 H 3.71854700 2.88755800 -1.34104200  
 H 2.51522200 2.03717800 -2.34616400  
 C -3.45876600 -0.73949000 -0.04935700  
 H -3.38783800 -0.44935000 -1.10412200  
 H -3.71907900 0.16366100 0.51040700  
 C -4.58228500 -1.78541000 0.11847900  
 H -4.65294300 -2.07907000 1.17590000  
 H -4.31671900 -2.69946800 -0.43254500  
 C -5.88691100 -1.30620400 -0.33968600  
 C -6.95498000 -0.89300800 -0.72393500  
 Si -1.12022700 2.68272900 0.16183900  
 H -7.89836300 -0.52968200 -1.06179400  
 C -2.88677600 2.91298800 0.82729000  
 H -3.63336900 2.45374900 0.16979900  
 H -3.00271900 2.47346400 1.82533100  
 H -3.12898800 3.98106100 0.90582700  
 C 0.01325000 3.71691300 1.28188200  
 H 1.05271300 3.72929500 0.93721400  
 H -0.33275400 4.75763100 1.32473600  
 H 0.00830600 3.32319800 2.30575700  
 C -1.07948300 3.38093800 -1.60366400  
 H -1.35804800 4.44265700 -1.61250500  
 H -0.09005000 3.28845000 -2.06404900  
 H -1.79029200 2.84539900 -2.24444400

#### TS1-1b

Ni 0.36750100 -1.43847400 -0.09518800  
 C -1.48178800 -0.22929400 -0.07971300  
 C -0.28762300 0.21705400 0.30958400  
 O -2.75629700 -1.30849000 -1.81175400  
 O -1.01191500 -2.54158000 -1.07420600  
 C -1.77464100 -1.52601500 -1.11311400  
 P 2.47552200 -1.56733500 0.26625500  
 Si -3.18779900 0.55509400 0.35551300  
 C -3.03022900 1.65875600 1.89925400  
 H -4.03962800 1.86747400 2.27798700  
 H -2.47530900 1.17078600 2.70930700  
 H -2.56208700 2.62961100 1.70010900  
 C -3.81399700 1.62137700 -1.07252300  
 H -3.92988300 1.01163000 -1.97164400  
 H -4.78343500 2.07015500 -0.81939300  
 H -3.11789800 2.43913000 -1.29567400  
 C -4.38605300 -0.83318900 0.81200900

H -4.55738700 -1.49860300 -0.03735800  
 H -4.00005900 -1.43065400 1.64709000  
 H -5.34823600 -0.40912200 1.12708100  
 C 0.28275500 1.47340400 0.87636800  
 H -0.52502500 2.10462900 1.26514800  
 H 0.93417400 1.23579300 1.72793700  
 C 3.56415800 -1.06515100 -1.14037400  
 H 3.45207300 0.00498800 -1.33797200  
 H 4.61710100 -1.28025700 -0.92478100  
 H 3.26259200 -1.60837400 -2.04096900  
 C 1.08389800 2.27280400 -0.17081200  
 H 1.89772500 1.65569100 -0.56859500  
 H 0.43723300 2.51603700 -1.02106800  
 C 3.25684800 -0.72047800 1.71147200  
 H 2.74614700 -1.01854900 2.63225800  
 H 4.31878600 -0.97862400 1.79174800  
 H 3.16615800 0.36443100 1.60557100  
 C 2.94761700 -3.33591500 0.53475500  
 H 2.45932800 -3.71348200 1.43840200  
 H 2.60305700 -3.93704300 -0.31225500  
 H 4.03294500 -3.44838800 0.63930300  
 C 1.67068700 3.57224400 0.42046600  
 H 0.85277200 4.20771800 0.78795500  
 H 2.28440500 3.33139800 1.30093400  
 C 2.47697000 4.32066200 -0.54395400  
 C 3.14190800 4.91928400 -1.35512700  
 H 3.72341700 5.45689600 -2.06892800

#### TS4-1b

Ni 0.87359700 -0.38588200 -0.10975300  
 C -0.59084300 1.15241600 0.08180200  
 C -0.93079200 -0.03391700 -0.38501800  
 O 1.01677700 2.37216600 1.63691800  
 O 0.44770700 0.24378700 2.25296400  
 C 0.50195400 1.26196500 1.56259100  
 P 0.92647800 -2.58353000 -0.06200000  
 P 3.06982500 0.29720600 -0.23293600  
 C -2.12379100 -0.67647600 -1.01530400  
 H -1.86537500 -1.65683700 -1.43650600  
 H -2.44394700 -0.05658300 -1.86517200  
 C -3.30760300 -0.83246100 -0.03935600  
 H -3.00087700 -1.41988200 0.83316800  
 H -3.60096000 0.15218600 0.33943600  
 C -4.52008900 -1.50874100 -0.71462100

H -4.21747400 -2.48656100 -1.11722900  
 H -4.83562000 -0.90998300 -1.58112500  
 C -5.65343500 -1.68824700 0.19300600  
 C -6.57756300 -1.82907700 0.95764000  
 C 2.37572500 -3.34663800 0.80608100  
 H 2.43988800 -2.93497700 1.81823700  
 H 2.27261900 -4.43615400 0.87045100  
 H 3.30654000 -3.11330000 0.28131300  
 C 0.90096700 -3.51971600 -1.66121100  
 H 0.00738100 -3.24669600 -2.23158300  
 H 1.77607100 -3.24945300 -2.26079300  
 H 0.90159300 -4.60356500 -1.49655800  
 C -0.46280700 -3.36280300 0.87820700  
 H -0.31789800 -4.44375600 0.98879400  
 H -0.51816100 -2.89726200 1.86670800  
 H -1.41192200 -3.18315500 0.36698100  
 C 4.00936500 0.29292000 1.36085200  
 H 4.05984300 -0.72201100 1.76670900  
 H 5.02658000 0.68122200 1.23196200  
 H 3.46665300 0.91903300 2.07499400  
 C 4.21903300 -0.59427700 -1.38697500  
 H 5.21627200 -0.13939000 -1.38174900  
 H 4.31643600 -1.64756300 -1.10619300  
 H 3.81851100 -0.54969500 -2.40528700  
 C 3.29399400 2.04254200 -0.79261100  
 H 2.87440700 2.16884600 -1.79541000  
 H 2.74467500 2.68712200 -0.10258000  
 H 4.35339200 2.32424300 -0.80661400  
 Si -1.27566900 2.87576000 -0.31042700  
 C 0.04729000 3.98644900 -1.08030900  
 H 0.85926600 4.16748100 -0.37184700  
 H 0.46997100 3.53924000 -1.98785500  
 H -0.39182700 4.95324800 -1.35894900  
 C -2.68843000 2.73117000 -1.57771400  
 H -3.07512300 3.73285900 -1.80691500  
 H -2.35230000 2.29029800 -2.52433500  
 H -3.53221300 2.13781200 -1.20627600  
 C -1.97128600 3.65210700 1.26710800  
 H -2.78005800 3.04431600 1.69054500  
 H -1.18504100 3.74809100 2.02130200  
 H -2.37843700 4.65016400 1.06025200  
 H -7.39476200 -1.95137100 1.63117300

#### INT8-1cd

C 2.68879500 -2.82924000 -0.16488300  
 C 1.52423600 -3.52905400 0.55441400  
 H 3.64042200 -3.11231200 0.30551200  
 H 2.73484500 -3.18798900 -1.20418200  
 C 0.17008800 -3.15471900 -0.06694400  
 H 1.66332700 -4.61585000 0.50460500  
 H 1.52922700 -3.24640100 1.61458500  
 H 0.14714000 -3.50787800 -1.10933200  
 H -0.63831500 -3.68065100 0.45892400  
 C 2.56563000 -1.35518600 -0.17273100  
 C 2.96586100 -0.16206200 -0.20103400  
 C -0.10932100 -1.69765900 -0.05405800  
 C -0.90614600 -0.70826000 -0.02738500  
 Si -2.70723200 -0.29124500 -0.02604500  
 H 3.77327900 0.54724600 -0.25276300  
 Ni 1.01986800 -0.09827500 -0.09747400  
 P 0.86112200 2.10853900 0.03883200  
 C -3.68759500 -1.85001300 0.43530200  
 H -4.76785500 -1.65632800 0.42135700  
 H -3.48770900 -2.66870100 -0.26612400  
 H -3.42570300 -2.20122200 1.44055600  
 C -3.13422500 1.05375300 1.24160900  
 H -2.69485600 2.02606000 0.99274900  
 H -4.22164600 1.19143800 1.29769000  
 H -2.78467000 0.77527000 2.24313300  
 C -3.24641000 0.26916400 -1.75563300  
 H -4.31765400 0.50739300 -1.77532800  
 H -2.69937700 1.15673500 -2.09238900  
 H -3.06745700 -0.52444000 -2.49079000  
 C 0.41694500 2.73225100 1.72774900  
 H 0.35353500 3.82660400 1.75915200  
 H -0.54117900 2.30532500 2.03514600  
 H 1.17698400 2.39808100 2.44144600  
 C 2.38723800 3.11101300 -0.29742000  
 H 2.19614000 4.18505500 -0.19098500  
 H 3.18006900 2.82523600 0.40108100  
 H 2.74299000 2.91254300 -1.31371800  
 C -0.34766300 3.01584000 -1.03742900  
 H -0.10882500 2.82346400 -2.08861600  
 H -1.36021700 2.65017700 -0.85200200  
 H -0.31898000 4.09721900 -0.85762800  
  
**TS7-1cd**  
 C 1.43081302 3.90686464 -0.26127943



C 2.65999437 3.37379838 0.53410862  
 H 0.99977579 4.78073181 0.18083264  
 H 1.68834185 4.13923902 -1.27349534  
 C 2.89934811 1.95407699 -0.06185306  
 H 3.51668180 4.01146532 0.46802136  
 H 2.38698308 3.27352007 1.56382173  
 H 3.29141751 2.00579290 -1.05608997  
 H 3.56943248 1.36543542 0.52923749  
 C 0.52717456 2.66894009 -0.21875171  
 C -0.82806402 2.45392707 -0.26320224  
 C 1.45881226 1.42969527 -0.08997778  
 C 0.87662061 0.18670169 -0.02853133  
 Si 1.74770087 -1.54659705 -0.00629017  
 H -1.61336023 3.17650311 -0.34126456  
 Ni -0.97098434 0.57251350 -0.14642997  
 C 1.19685119 -2.52692861 1.57456867  
 H 1.67729236 -3.48292328 1.58683571  
 H 1.47400102 -1.97721516 2.44972757  
 H 0.13544104 -2.66134574 1.55905973  
 C 1.24520492 -2.54327378 -1.59302686  
 H 1.54902407 -2.00257544 -2.46494384  
 H 1.72564609 -3.49926844 -1.58075982  
 H 0.18379477 -2.67769090 -1.60853580  
 C 3.67212675 -1.30288750 0.02182886  
 H 4.15256792 -2.25888217 0.03409589  
 H 3.97594590 -0.76218917 -0.85008813  
 H 3.94927658 -0.75317405 0.89698775  
 P -2.73208743 -0.73439644 0.02821917  
 C -2.19781133 -2.47417730 0.03878362  
 H -1.54536430 -2.64187891 0.87010128  
 H -3.05434783 -3.10981077 0.12372660  
 H -1.67961447 -2.69368041 -0.87126605  
 C -3.84185715 -0.44914696 -1.38579778  
 H -4.69839365 -1.08478044 -1.30085479  
 H -4.15596453 0.57369123 -1.39200875  
 H -3.32366029 -0.66865008 -2.29584745  
 C -3.61350638 -0.36103600 1.57615412  
 H -3.92761376 0.66180219 1.56994315  
 H -4.47004288 -0.99666947 1.66109711  
 H -2.96105935 -0.52873762 2.40747178

#### INT9-1cd

C 1.48990500 3.51723200 -0.13487600  
 C 2.91566200 3.13890600 0.35549500

H 1.02061500 4.29696000 0.47587800  
 H 1.53879500 3.90115300 -1.16532900  
 C 3.14505300 1.68720600 -0.14711700  
 H 3.68471600 3.83980800 0.01223100  
 H 2.93072800 3.14601800 1.45280400  
 H 3.52316000 1.70581900 -1.18123100  
 H 3.88245700 1.14074800 0.45199900  
 C 0.76659600 2.18577000 -0.10221200  
 C -0.51838000 1.80015400 -0.03338300  
 C 1.75046100 1.08338500 -0.10903700  
 C 1.23174300 -0.16110800 -0.04862700  
 Si 2.02200200 -1.84063300 0.00511000  
 H -1.36538200 2.49219200 0.00877500  
 Ni -0.70364700 -0.09643600 -0.01548100  
 P -3.01220700 -0.11842000 0.01290700  
 C 3.08308100 -2.10740700 1.56184700  
 H 3.48639000 -3.12757500 1.60529100  
 H 3.93172300 -1.41300600 1.58658700  
 H 2.49499800 -1.93928700 2.47211100  
 C 3.08108400 -2.21645900 -1.53009100  
 H 3.48047000 -3.23885000 -1.50468500  
 H 2.49282200 -2.10856400 -2.44944700  
 H 3.93204900 -1.52841500 -1.60273600  
 C 0.59038200 -3.10351300 0.04866200  
 H -0.04742000 -2.95584900 0.93190900  
 H -0.04396800 -3.01918000 -0.84520700  
 H 0.95675400 -4.13721000 0.08620800  
 C -3.93610200 -1.72665900 0.01824900  
 H -3.67597600 -2.30611800 -0.87357300  
 H -3.65218900 -2.31408800 0.89749800  
 H -5.02045300 -1.56846400 0.03347300  
 C -3.74401400 0.75479700 1.47063000  
 H -3.32261100 1.76226600 1.53699100  
 H -4.83566200 0.82296000 1.40017900  
 H -3.47689900 0.21986900 2.38748600  
 C -3.78267400 0.76801000 -1.41661700  
 H -4.87146000 0.84066400 -1.31342900  
 H -3.35790100 1.77364400 -1.48854500  
 H -3.54534600 0.23797300 -2.34444100

#### TS8-1c

C 1.64194100 3.18239200 -0.94119700  
 C 3.04952300 3.00714400 -0.30297400  
 H 1.07930700 4.03974800 -0.55748000

H 1.70899700 3.29881200 -2.03409900  
 C 3.31336100 1.47445000 -0.28277800  
 H 3.82734400 3.56688400 -0.83174000  
 H 3.01859300 3.38298500 0.72628200  
 H 3.84079500 1.15747700 -1.19474800  
 H 3.93634800 1.17019400 0.56538400  
 C 0.95954700 1.88717900 -0.60747800  
 C -0.39052300 1.52262800 -0.53997900  
 C 1.91092200 0.88288700 -0.24604900  
 C 1.35817000 -0.35590100 -0.05400200  
 Si 2.18688100 -2.02297000 0.20111000  
 H -1.09513100 2.00054600 -1.22710100  
 Ni -0.53730700 -0.34852500 -0.12607400  
 P -2.85121500 -0.67417600 -0.28638600  
 C -1.06639700 2.29297400 1.04304100  
 O -1.52884900 1.38962600 1.72652900  
 O -0.95738400 3.49738900 1.00103400  
 C 3.44415600 -1.98659500 1.62280600  
 H 3.86075600 -2.98610200 1.80223400  
 H 4.28022300 -1.31250200 1.40333600  
 H 2.97801100 -1.64634500 2.55484800  
 C 3.03376900 -2.58496900 -1.40264400  
 H 3.85814100 -1.91427000 -1.67222100  
 H 3.44597500 -3.59676100 -1.29972900  
 H 2.32724500 -2.59518600 -2.24115700  
 C 0.80628600 -3.25850300 0.63375500  
 H 0.29043000 -2.97329400 1.56004200  
 H 0.05681600 -3.31936200 -0.16806800  
 H 1.20218700 -4.27135200 0.77945700  
 C -3.64942400 -1.13902400 1.31403100  
 H -3.24539000 -2.09341800 1.66780300  
 H -3.40732600 -0.36718700 2.04939200  
 H -4.73692900 -1.22918400 1.21294900  
 C -3.84464300 0.79012400 -0.81476000  
 H -3.66459200 1.60939400 -0.11393500  
 H -3.53643200 1.11170800 -1.81454800  
 H -4.91516600 0.55685800 -0.82936100  
 C -3.45400600 -1.99531100 -1.43966200  
 H -3.13623000 -1.76539500 -2.46186600  
 H -3.01748600 -2.95997400 -1.15972000  
 H -4.54625800 -2.08431400 -1.41879000

# **TS8-1d**

C 1.30618800 3.65155300 -0.10882300

C 2.77199700 3.31624200 0.26651000  
 H 0.85291500 4.38540900 0.56715700  
 H 1.25713100 4.07651000 -1.12221200  
 C 2.99493000 1.87293600 -0.25543000  
 H 3.49547100 4.03111200 -0.13959500  
 H 2.87824100 3.32349700 1.35829900  
 H 3.24557400 1.89866100 -1.32632900  
 H 3.80996500 1.35238400 0.25525500  
 C 0.62675200 2.29287400 -0.06635800  
 C -0.65436400 1.88533700 -0.15707700  
 C 1.63443000 1.22578000 -0.04085100  
 C 1.23131900 -0.06930500 0.08796400  
 Si 2.16899100 -1.60402700 -0.48303100  
 H -1.47661200 2.59961500 -0.26863100  
 Ni -0.80692400 0.00247200 0.05328300  
 P -3.04580700 -0.03467600 -0.29150100  
 C 0.14526700 -0.88613000 1.76110900  
 O -0.63138000 -1.68092700 1.21092500  
 O 0.67145300 -0.55745500 2.77305700  
 C 2.66100100 -2.75614000 0.94381900  
 H 1.78729000 -3.18369300 1.44758100  
 H 3.26515700 -3.59052400 0.56463200  
 H 3.25501100 -2.22815000 1.69877900  
 C 1.03855600 -2.55951500 -1.67615100  
 H 1.55368100 -3.44461800 -2.07111500  
 H 0.12682000 -2.90029400 -1.17317300  
 H 0.74508600 -1.93631900 -2.53015800  
 C 3.75619700 -1.16718800 -1.43646500  
 H 3.56040200 -0.48442200 -2.27126800  
 H 4.51551600 -0.70513300 -0.79608200  
 H 4.19329800 -2.08355700 -1.85442800  
 C -3.82412200 -1.70905500 -0.25673400  
 H -4.91505000 -1.65358700 -0.34277500  
 H -3.43080500 -2.31329800 -1.08042000  
 H -3.55699400 -2.20592800 0.68079900  
 C -3.99735100 0.89602100 0.98878000  
 H -5.07362700 0.88048500 0.78330800  
 H -3.81363700 0.44923500 1.97085600  
 H -3.65029100 1.93304300 1.02028000  
 C -3.64972600 0.68926600 -1.87921100  
 H -3.23937200 0.11910600 -2.71859300  
 H -4.74380300 0.67884500 -1.94072000  
 H -3.29327100 1.71991400 -1.96676800

**INT5-1b**

Ni -1.61087000 -0.66732700 -0.47402200  
O -0.12801200 -1.34591600 -1.15628400  
O 1.93373700 -1.77293900 -1.84922000  
C 1.16912000 -1.12623900 -1.13492300  
C 1.77004100 -0.11279600 -0.19962900  
C 1.26914300 1.13689700 -0.02544300  
C 2.04585900 2.30386000 0.58282900  
H 3.12554700 2.14906900 0.58915100  
H 1.72941400 2.47574000 1.62308300  
P -3.63310900 -0.33188300 0.40105200  
C 1.62749900 3.49795300 -0.29424000  
C 0.13462100 3.24423700 -0.57099300  
H 2.19195900 3.47201200 -1.23417300  
H 1.81628600 4.46631000 0.18111200  
H -0.48494000 3.72533600 0.19813300  
H -0.19266100 3.63924900 -1.53921000  
C -0.01995400 1.71444000 -0.49266900  
C -1.21087200 1.12477000 -0.67631800  
H -2.05764400 1.73716400 -1.00091000  
Si 3.42995100 -0.74855900 0.51184800  
C 3.76630200 -0.01327400 2.23928600  
H 4.55828800 -0.59914000 2.72391600  
H 4.09503600 1.03078600 2.23002900  
H 2.87835200 -0.07695100 2.88068200  
C 4.87328200 -0.33254700 -0.64239800  
H 4.99499000 0.74947700 -0.77490900  
H 5.81877300 -0.72841800 -0.25008900  
H 4.69441000 -0.77576400 -1.62723500  
C 3.31501400 -2.61922000 0.78575000  
H 2.47809200 -2.87327000 1.44900300  
H 3.17195400 -3.15085800 -0.15782200  
H 4.23274400 -2.98674900 1.26280900  
C -3.62440700 0.58691500 1.99993400  
H -3.14145000 1.55714800 1.85203600  
H -4.63880600 0.73884200 2.38480100  
H -3.03836500 0.02930800 2.73683900  
C -4.84521000 0.60938600 -0.62534500  
H -5.02137600 0.07720900 -1.56513900  
H -5.79806200 0.73698000 -0.10012600  
H -4.43823700 1.59621200 -0.86563800  
C -4.54711600 -1.88937100 0.80316700  
H -5.51833100 -1.67793900 1.26420900  
H -4.70696400 -2.46920500 -0.11147900

H -3.95308500 -2.49852600 1.49187200

**TS3-1b**

C 0.91454000 3.60331800 -0.13396200  
C 2.32636400 3.31660300 0.40220600  
H 0.37480500 4.36960900 0.43179500  
H 0.97456200 3.94834400 -1.17678400  
C 2.65095300 1.92178600 -0.14283700  
H 3.05088900 4.07753700 0.09192800  
H 2.30950600 3.29570300 1.49927300  
H 2.97656200 2.00089000 -1.19158200  
H 3.44805100 1.41593000 0.40645400  
C 0.20387100 2.25701100 -0.09580500  
C -1.10610600 2.02701900 -0.08005600  
C 1.33793300 1.12014000 -0.07646600  
C 1.15947600 -0.21031200 -0.02274100  
Si 2.28968100 -1.66256300 0.00222000  
H -1.92040900 2.74397000 -0.07585200  
Ni -0.79008500 0.20838300 -0.03993000  
C 1.89742900 -2.70199400 1.54558300  
H 2.50487200 -3.61547400 1.58255900  
H 2.09344500 -2.13388900 2.46352200  
H 0.84131800 -2.99634400 1.56017500  
C 1.94075400 -2.71553700 -1.54288900  
H 2.17603600 -2.16203800 -2.46046400  
H 2.53903800 -3.63577100 -1.54563200  
H 0.88271400 -2.99903900 -1.59147900  
C 4.16568700 -1.30733100 0.02993800  
H 4.73807600 -2.24452100 0.01634200  
H 4.48317700 -0.71658200 -0.83797800  
H 4.46335700 -0.75797500 0.93189000  
P -2.79597600 -0.46045500 0.02395300  
C -2.98188400 -2.29859400 0.08005300  
H -2.47020800 -2.68651200 0.96586900  
H -4.03680200 -2.59707700 0.10980700  
H -2.50615200 -2.73714700 -0.80221200  
C -3.85274500 0.01634300 -1.41475000  
H -4.86790300 -0.38492700 -1.31684400  
H -3.90034500 1.10681400 -1.48599100  
H -3.40426800 -0.36376400 -2.33747200  
C -3.78956000 0.09886000 1.47764200  
H -3.83095500 1.19182000 1.49125800  
H -4.80895000 -0.30229700 1.44334200  
H -3.30421100 -0.23315400 2.40024500

### 3

O -0.12587500 1.51468600 0.03175600  
O 1.04414000 3.42613500 0.06843000  
C 1.09499300 2.21749300 0.02334800  
C 2.28126600 1.38674700 -0.03624500  
C 2.16922500 0.03496500 -0.08203500  
H 3.23363500 1.90652800 -0.03662800  
C 3.25852800 -1.01180100 -0.15161400  
H 4.13954700 -0.75473900 0.44532800  
H 3.59519300 -1.11515100 -1.19348300  
C 2.54474800 -2.30106500 0.31876300  
C 1.06935700 -2.11928200 -0.11946800  
H 2.59427700 -2.36541900 1.41232100  
H 2.99797100 -3.21067000 -0.08641300  
H 0.92936100 -2.49017900 -1.14517700  
H 0.37496600 -2.67325600 0.51739200  
C 0.87950000 -0.61340000 -0.06709000  
C -0.24839500 0.14400600 -0.01358000  
Si -2.10695700 -0.29574100 0.00088400  
C -2.38358100 -2.16565400 -0.07772900  
H -2.01535700 -2.68107000 0.81646600  
H -3.45985100 -2.36748400 -0.14976300  
H -1.90682400 -2.62105000 -0.95293100  
C -2.83496100 0.41407100 1.59337800  
H -3.92409000 0.28573500 1.61831000  
H -2.42042400 -0.07781400 2.48119300  
H -2.61890000 1.48509600 1.67208800  
C -2.87423300 0.53895200 -1.51094900  
H -2.65189600 1.61151100 -1.51525300  
H -2.49039800 0.11272100 -2.44536000  
H -3.96461300 0.41886400 -1.51262700

### INT1-le

Ni -2.10527300 0.12620200 0.06210400  
C -0.57315100 1.21709000 -0.08632500  
C -0.22365600 -0.00690800 0.11099800  
H -0.18866500 2.21507700 -0.26094500  
C 0.90296100 -0.96831000 0.27868600  
H 0.82929400 -1.44827900 1.26666300  
H 0.80114000 -1.78629400 -0.45093200  
P -3.06578500 -1.84711100 0.17146000  
C -2.48072700 -3.11849000 -1.04952500  
H -1.43782000 -3.37052700 -0.83254200

H -3.08298600 -4.03481200 -1.02160500  
H -2.51381600 -2.69683400 -2.05922300  
C -3.17812500 -2.87607400 1.71292200  
H -3.76969300 -3.78807600 1.56698700  
H -2.16830200 -3.15707200 2.02911500  
H -3.62627400 -2.28315800 2.51669700  
C -4.86454600 -1.66793700 -0.30783300  
C 2.29137300 -0.32359200 0.12838700  
H 2.40466900 0.47719900 0.86810300  
H 2.37135000 0.14639500 -0.85852400  
C 3.43286900 -1.34964500 0.30284900  
H 3.31309100 -2.15645100 -0.43534400  
H 3.34521600 -1.82762100 1.28978800  
C 4.76629800 -0.76493200 0.16651100  
C 5.86943000 -0.25938600 0.04995300  
Si 7.53109200 0.49956000 -0.12084200  
C 8.84921700 -0.79445500 0.29244100  
H 8.79071500 -1.65181300 -0.38800400  
H 9.85655800 -0.36747500 0.20772100  
H 8.73049200 -1.17181300 1.31467000  
C 7.76135000 1.09957500 -1.90075300  
H 7.67603700 0.27108600 -2.61340800  
H 7.00696500 1.84813500 -2.16895300  
H 8.74994600 1.55655900 -2.03519500  
C 7.67001100 1.96085600 1.07368800  
H 6.90930600 2.72089600 0.86144100  
H 7.53679900 1.63784700 2.11262300  
H 8.65401800 2.44029600 0.99524500  
C -5.05686400 -0.46887200 -1.26721800  
C -4.95652600 0.87911900 -0.58689800  
C -6.07622400 1.71652000 -0.52576600  
C -5.99371200 2.95427600 0.10604000  
C -4.77408000 3.32863500 0.66744900  
C -3.69999000 2.45185700 0.56926700  
N -3.77184600 1.24655800 -0.03721300  
H -6.85851800 3.61001100 0.15481800  
H -7.00668100 1.38900200 -0.97977100  
H -4.64643400 4.28269300 1.16888800  
H -2.72777800 2.70181000 0.97756900  
H -5.45805800 -1.51173800 0.60154900  
H -5.23327800 -2.58701700 -0.78029400  
H -6.04100900 -0.54105800 -1.74438500  
H -4.30967900 -0.51967400 -2.07053100

**TS4-1e**

Ni -1.90843300 0.05228200 -0.06805500  
C -0.32294000 -0.95689500 0.73977000  
C -0.10548200 0.24671400 0.25041800  
H 0.31825600 -1.83233900 0.78402000  
C 1.03166700 1.14936100 -0.08292900  
H 0.88581100 1.57921000 -1.08442200  
H 0.99737900 2.00499500 0.61166900  
P -2.77998200 2.03849800 -0.22880300  
C -2.41888000 3.04562800 1.27578100  
H -1.36980400 3.35728300 1.25480700  
H -3.05545500 3.93534400 1.34659600  
H -2.55612200 2.40874700 2.15420500  
C -2.52917400 3.24426900 -1.61029500  
H -3.12900900 4.15141900 -1.47230300  
H -1.47227900 3.52456800 -1.66032800  
H -2.80097000 2.77686600 -2.56196700  
C -4.63320400 1.84121800 -0.17426400  
C 2.41535900 0.48293200 0.00630200  
H 2.46102800 -0.36487300 -0.68697900  
H 2.56213800 0.07630900 1.01293300  
C 3.55452600 1.47223100 -0.32302300  
H 3.51637700 2.31858400 0.37855800  
H 3.38867600 1.89986700 -1.32298900  
C 4.88162900 0.86024200 -0.27385000  
C 5.97909600 0.33209400 -0.23050400  
Si 7.63479500 -0.46146800 -0.16378100  
C 8.81514300 0.65726200 0.80326900  
H 8.45823800 0.82001200 1.82675700  
H 9.81514700 0.20967600 0.86474000  
H 8.91636100 1.63849700 0.32537700  
C 7.48136500 -2.13731900 0.70001500  
H 7.09841900 -2.02552700 1.72084300  
H 6.79826900 -2.80262200 0.15953700  
H 8.45675900 -2.63643400 0.76069400  
C 8.27499700 -0.70212300 -1.92797500  
H 7.60385400 -1.34345000 -2.51081600  
H 8.36196400 0.25536600 -2.45436400  
H 9.26636000 -1.17246700 -1.92219100  
C -5.05009300 0.55637700 0.58119700  
C -4.80802800 -0.71596400 -0.19871600  
C -5.86999300 -1.55795300 -0.54559500  
C -5.62558900 -2.73956600 -1.24012500  
C -4.31143600 -3.05930200 -1.57577900

C -3.30300000 -2.17809700 -1.20427500  
N -3.53682900 -1.02902800 -0.54075100  
H -6.44512500 -3.40075200 -1.50727800  
H -6.88004900 -1.28369500 -0.25775400  
H -4.06353900 -3.97339800 -2.10473700  
H -2.26193300 -2.38627600 -1.42614900  
H -5.01122500 1.80990100 -1.20384500  
H -5.08211500 2.71797900 0.30839300  
H -6.11702000 0.61546800 0.82267900  
H -4.50355700 0.48314600 1.53036800  
C -1.69687800 -1.33455800 1.96426400  
O -2.23764300 -0.31268500 2.39126000  
O -1.72545800 -2.53460500 2.12469200

**INT6-1e**

Ni -2.12324400 0.32350900 -0.10514800  
C 0.10039500 1.80776000 -0.55753600  
C -0.19872700 0.54537900 -0.20585300  
H 1.10661900 2.21024800 -0.66618200  
C 0.86242700 -0.46680600 0.16778100  
H 0.68169400 -0.78656600 1.20709600  
H 0.75139600 -1.38012300 -0.43630600  
P -2.16734000 -1.91556800 -0.10738600  
C -1.52228600 -2.62830800 -1.69010800  
H -0.47810400 -2.34600500 -1.83985100  
H -1.60672700 -3.72091400 -1.69952700  
H -2.09697000 -2.21804700 -2.52656200  
C -1.41535400 -2.99573700 1.19250600  
H -1.65143800 -4.05049700 1.01178500  
H -0.33038400 -2.87149800 1.20621100  
H -1.80448200 -2.70590500 2.17371700  
C -3.92152600 -2.53137100 -0.13856700  
C 2.32447300 -0.00466300 0.05378600  
H 2.49130300 0.87295600 0.68756800  
H 2.54241900 0.30357300 -0.97504000  
C 3.30799500 -1.12203000 0.46767500  
H 3.13478600 -2.01152700 -0.15660000  
H 3.09418600 -1.43159400 1.50156100  
C 4.71238000 -0.72788600 0.36282900  
C 5.87777300 -0.38406400 0.26832500  
Si 7.63497600 0.13273200 0.12771600  
C 8.62318100 -1.26173900 -0.68528100  
H 8.23928400 -1.48987300 -1.68630500  
H 9.67969600 -0.98342100 -0.78749100

H 8.57566200 -2.18226200 -0.09204600  
 C 7.73652600 1.69663500 -0.93081400  
 H 7.33918400 1.52215100 -1.93730400  
 H 7.16263000 2.51691200 -0.48479000  
 H 8.77615800 2.03224300 -1.03445200  
 C 8.31661900 0.47653400 1.85902700  
 H 7.75507600 1.27581800 2.35616100  
 H 8.25938700 -0.41558200 2.49335300  
 H 9.36822300 0.78613500 1.81037100  
 C -4.85065600 -1.56878500 -0.90557300  
 C -5.17603400 -0.32413600 -0.11383400  
 C -6.50027500 -0.03549000 0.22869300  
 C -6.79159700 1.10231500 0.97699900  
 C -5.74141900 1.93134100 1.35997600  
 C -4.44770700 1.59195900 0.97635100  
 N -4.15988300 0.48340000 0.26268500  
 H -7.81725000 1.33646300 1.24813000  
 H -7.29137000 -0.70327100 -0.09796300  
 H -5.90920600 2.83604300 1.93465700  
 H -3.60286100 2.23151100 1.19643800  
 H -4.27373400 -2.64396400 0.89390000  
 H -3.94087400 -3.52686000 -0.59891400  
 H -5.78591900 -2.08397000 -1.14857800  
 H -4.39369900 -1.28444200 -1.86312800  
 C -1.04740800 2.73235600 -0.74441000  
 O -2.20769600 2.13500100 -0.48787400  
 O -0.95191800 3.90823900 -1.06383000

#### INT4-1e

Ni 0.94093100 0.63721200 -0.45177000  
 O 1.23225100 0.88688900 -2.25526900  
 O 2.27751100 2.22156500 -3.73094600  
 C 1.91637900 1.98342900 -2.58930900  
 C 2.15212100 2.86030900 -1.41145400  
 C 1.71615700 2.37837800 -0.23851000  
 H 2.62372600 3.83461400 -1.55061700  
 C 1.71646400 3.17325300 1.04098400  
 H 2.10420800 4.18333800 0.84491700  
 H 2.37665000 2.72017800 1.79555000  
 C 0.29048900 3.28179200 1.61590300  
 C -0.21609600 1.94304500 2.22815400  
 H -0.38459700 3.59371200 0.81142600  
 H 0.24340500 4.05332500 2.39291000  
 H -0.03071400 1.93726800 3.31121900

H -1.30077800 1.84049900 2.10117300  
 C 0.48418700 0.77234300 1.68136500  
 C 1.24662800 -0.18488900 1.49593700  
 Si 2.44753800 -1.58325900 1.77838700  
 C 1.53643900 -3.23279300 1.64597600  
 H 1.12649800 -3.39583900 0.64401900  
 H 2.22241400 -4.06065200 1.86564000  
 H 0.70999100 -3.28692200 2.36401900  
 C 3.85744900 -1.46795100 0.53222700  
 H 3.51353900 -1.62339800 -0.49537100  
 H 4.33854300 -0.48435900 0.57225300  
 H 4.61994700 -2.22658200 0.74919600  
 C 3.10504000 -1.34802500 3.53652700  
 H 2.29583500 -1.37889600 4.27507500  
 H 3.81888900 -2.14224500 3.78877300  
 H 3.62226500 -0.38784800 3.64331800  
 C -1.22925300 -1.55245300 -0.77871800  
 C -1.72344400 -2.75992600 -1.28452000  
 C -0.92441600 -3.54848400 -2.10913600  
 C 0.35296600 -3.10003400 -2.43548200  
 C 0.78145600 -1.88949200 -1.90008600  
 N 0.02798800 -1.14719800 -1.06884500  
 H -1.30321800 -4.48691000 -2.50478500  
 H -2.73362700 -3.07021500 -1.04374100  
 H 1.00333400 -3.65943300 -3.09964800  
 H 1.74241200 -1.46271300 -2.16180300  
 C -2.06408400 -0.62751600 0.08440400  
 C -3.58557200 -0.81401700 -0.00302200  
 P -4.50232900 0.49885300 0.98150000  
 C -4.42290000 1.92218700 -0.22438800  
 C -6.25060600 -0.07152700 0.66662400  
 H -1.79374900 0.39571400 -0.20292800  
 H -1.74449500 -0.73552900 1.12882000  
 H -3.92003300 -0.80431900 -1.04958600  
 H -3.87840300 -1.78229600 0.42340800  
 H -6.43851700 -1.00267900 1.21214200  
 H -6.95090100 0.68080500 1.04509300  
 H -6.45831000 -0.23756400 -0.39770300  
 H -4.75955900 1.64267300 -1.23033000  
 H -5.05320300 2.74012500 0.14129000  
 H -3.39865200 2.30402200 -0.29330700

#### INT4-1e'

Ni -1.38767800 -0.59192700 0.17212700



P 1.93443800 -1.79534000 -0.01415300  
 C 1.73784400 -3.45536600 0.76687200  
 H 1.16213500 -4.10987800 0.10604600  
 H 2.71030900 -3.91671100 0.97196100  
 H 1.17841500 -3.34242000 1.69956800  
 C 3.00928200 -2.17181300 -1.47716100  
 H 3.92222400 -2.70637800 -1.19005400  
 H 2.45210300 -2.78524900 -2.19281700  
 H 3.28448700 -1.23717600 -1.97622600  
 C 3.10592100 -0.91759100 1.15629900  
 C 2.56155200 0.45544500 1.61661700  
 C 2.37686100 1.41444600 0.46897300  
 C 3.20282500 2.53411400 0.30769400  
 C 3.02961700 3.37865100 -0.78476500  
 C 2.02577100 3.08216000 -1.70724000  
 C 1.23649200 1.95967500 -1.48479100  
 N 1.39702400 1.14468300 -0.42564100  
 H 3.66472100 4.25053300 -0.91421100  
 H 3.97179100 2.73375100 1.04740300  
 H 1.84892200 3.70558600 -2.57760300  
 H 0.42487700 1.69622700 -2.15553200  
 H 4.08711100 -0.80605800 0.67832700  
 H 3.24470600 -1.55383900 2.03723900  
 H 3.26108700 0.89136300 2.33884800  
 H 1.59639400 0.30162300 2.11473600

#### INT7-1e

Ni -0.37777300 0.00168800 0.18709700  
 O -0.16448000 1.57075600 1.18739800  
 O -0.48509700 3.76384400 0.88960300  
 C -0.03742500 2.68528700 0.50111100  
 C 0.73696600 2.68857700 -0.79078800  
 C 1.74138600 1.86795400 -1.17412300  
 H 0.57758100 3.60489600 -1.35618500  
 C 2.74729700 2.21572700 -2.25544500  
 H 2.67673200 3.25175900 -2.60084900  
 H 2.61789400 1.56083100 -3.13158100  
 C 4.08618600 1.89006600 -1.55669500  
 C 3.77799100 0.63853900 -0.69996400  
 H 4.36105100 2.72866500 -0.90601900  
 H 4.91135500 1.73189300 -2.25964400  
 H 4.04406400 -0.27576300 -1.24784300  
 H 4.35667900 0.62382600 0.23088600  
 C 2.25710100 0.68166000 -0.44858900

C 1.51946800 -0.19120400 0.27027600  
 Si 2.18637100 -1.28538500 1.65095500  
 C 3.48136400 -2.55945200 1.07011900  
 H 4.34628900 -2.07242500 0.60592800  
 H 3.84983000 -3.14199800 1.92466200  
 H 3.07514700 -3.27249500 0.34198500  
 C 2.97430900 -0.17064000 2.96920600  
 H 3.85631500 0.35840900 2.59007500  
 H 2.25144900 0.58727600 3.29212100  
 H 3.28386800 -0.74874300 3.84947800  
 C 0.77214000 -2.22845000 2.50039400  
 H 0.28192400 -2.95244600 1.84013100  
 H 1.15137000 -2.78115700 3.36973000  
 H 0.00493200 -1.53238500 2.86004400  
 P -0.53379000 -1.63223900 -1.31615500  
 C 0.34693500 -1.19558900 -2.88067300  
 H 1.40910800 -1.06921600 -2.65749100  
 H 0.21845500 -1.97064500 -3.64462500  
 H -0.02693400 -0.24150900 -3.26378600  
 C 0.01585800 -3.37491000 -1.03979400  
 H -0.15262100 -3.98413500 -1.93498300  
 H 1.08114100 -3.39287900 -0.79587800  
 H -0.53479400 -3.81318900 -0.20231900  
 C -2.28512400 -1.86481800 -1.89564300  
 C -3.05565500 -0.52903700 -1.91282000  
 C -3.44535300 -0.03755800 -0.53650100  
 C -4.79465700 0.12419400 -0.20826800  
 C -5.15147500 0.59238500 1.05438100  
 C -4.13984600 0.90398100 1.95767600  
 C -2.81631700 0.72692600 1.56427300  
 N -2.46758700 0.24924900 0.35256400  
 H -6.19737500 0.72191000 1.31857200  
 H -5.55418900 -0.10947500 -0.94801400  
 H -4.35803800 1.29244200 2.94689700  
 H -1.98535200 1.01554000 2.19767100  
 H -2.78272800 -2.57301400 -1.22180000  
 H -2.28301000 -2.31375900 -2.89671800  
 H -3.96667500 -0.64673100 -2.50942700  
 H -2.45535100 0.24283400 -2.41353400

#### TS6-1e

Ni 0.40207500 0.06365000 0.12579500  
 O -0.39978900 -1.66018800 0.06183000  
 O 0.47323000 -3.17774800 -1.33653200



C -0.25916600 -2.19857200 -1.21601000  
 C -1.03578800 -1.59330300 -2.27139500  
 C -2.03396400 -0.66436800 -2.05121500  
 C -3.09793800 -0.26521200 -3.05674400  
 H -3.29579000 -1.03849600 -3.80736500  
 H -2.78420000 0.63919500 -3.60108000  
 C -4.32234300 0.03707600 -2.16301100  
 C -3.72756900 0.53861100 -0.82334400  
 H -4.87307000 -0.89465300 -1.98589600  
 H -5.02013900 0.75103700 -2.61527200  
 H -3.67660700 1.64000600 -0.81264600  
 H -4.35550000 0.25635100 0.03160200  
 C -2.33631900 -0.08900200 -0.79181300  
 C -1.47518000 -0.19779300 0.29961300  
 Si -2.03718500 -0.36543600 2.10995000  
 C -3.31665800 -1.75652300 2.25125700  
 H -3.62571700 -1.90667000 3.29357200  
 H -4.21691800 -1.54901600 1.66146200  
 H -2.89107600 -2.69795500 1.88557700  
 C -2.80597900 1.26436700 2.72035400  
 H -2.06160400 2.06634900 2.78356000  
 H -3.61963300 1.61061200 2.07332600  
 H -3.22128100 1.12689500 3.72728400  
 C -0.56290100 -0.78415800 3.22214200  
 H 0.21014500 -0.00708400 3.18588700  
 H -0.88612700 -0.88802800 4.26612300  
 H -0.10221600 -1.72940100 2.91572100  
 H -0.93317400 -2.07033800 -3.24162700  
 P 0.71452100 2.21437500 -0.05398600  
 C 0.00952900 2.90073300 -1.62133300  
 H -1.06275800 2.68408900 -1.64465800  
 H 0.16908300 3.98163200 -1.71029500  
 H 0.46264800 2.39596200 -2.47997500  
 C 0.15866200 3.46769300 1.18978300  
 H 0.48486400 4.47763000 0.91525700  
 H -0.93322700 3.45607000 1.25440100  
 H 0.56025600 3.21984200 2.17740200  
 C 2.52811700 2.59641600 -0.20980600  
 C 3.26577000 1.54685500 -1.06834400  
 C 3.49335500 0.20376000 -0.40358500  
 C 4.79144900 -0.30145200 -0.28426900  
 C 4.99761200 -1.56693700 0.26248400  
 C 3.89074600 -2.30600200 0.66830100  
 C 2.62633200 -1.73913800 0.53160900

N 2.42496900 -0.50636300 0.02581500  
 H 6.00282700 -1.96901500 0.35484400  
 H 5.63029000 0.29452200 -0.63102100  
 H 3.99009000 -3.30690900 1.07492000  
 H 1.72849000 -2.28616700 0.79655600  
 H 2.95779400 2.62288800 0.79938600  
 H 2.66322200 3.59437000 -0.64648900  
 H 4.24165800 1.95116400 -1.35905500  
 H 2.71341600 1.38311200 -2.00441900

# INT2-1e

Ni -2.01640600 0.78752400 0.99763500  
 C -0.40925200 0.47157200 1.91270900  
 C -0.14099800 0.72244100 0.69043500  
 O -2.71309500 3.25245400 2.28056000  
 O -3.61700800 1.09504000 2.40772300  
 C -2.94770000 2.08877300 2.16185300  
 C 0.81338900 0.90748800 -0.43310800  
 H 0.51191600 0.27730200 -1.28201600  
 H 0.74499500 1.94381800 -0.79514200  
 H -0.06536400 0.24656500 2.91101900  
 C 2.26900600 0.59311900 -0.04251200  
 C 3.24194600 0.80227500 -1.22318500  
 H 2.33914300 -0.44262000 0.30858000  
 H 2.56907100 1.23198100 0.79544000  
 H 2.92969100 0.17323000 -2.06982000  
 H 3.17031500 1.84181600 -1.57535800  
 C 4.63087500 0.50039200 -0.87982100  
 C 5.78164500 0.24365800 -0.57168400  
 Si 7.52021600 -0.13639100 -0.11219500  
 C 8.53843600 -0.35561800 -1.69185900  
 H 9.58575900 -0.57996200 -1.45337900  
 H 8.15104500 -1.17869800 -2.30330500  
 H 8.52212900 0.55223900 -2.30575300  
 C 8.21358800 1.29560200 0.91085300  
 H 8.19882600 2.23336200 0.34362800  
 H 7.63007400 1.45031000 1.82567600  
 H 9.25208900 1.09852500 1.20533000  
 C 7.55464500 -1.73258800 0.90250600  
 H 6.96191600 -1.63485400 1.81925600  
 H 7.14938700 -2.57595600 0.33162100  
 H 8.58153200 -1.98760300 1.19319300  
 C -3.05805400 2.33107600 -1.24501000  
 C -4.09661800 0.25357600 -1.09424000

C -3.80186100 2.69080600 -2.36262000  
 H -2.33234100 3.01049200 -0.81025200  
 C -4.87779200 0.55315600 -2.21669700  
 C -4.73186500 1.77840700 -2.86028500  
 H -3.65526300 3.66315000 -2.82099500  
 H -5.59811700 -0.17813800 -2.57039800  
 H -5.33732800 2.01977700 -3.72945700  
 C -4.21543400 -1.07696500 -0.39021200  
 C -3.12527200 -2.07503900 -0.83646400  
 H -3.19865800 -2.23586100 -1.92031800  
 H -2.13058300 -1.65544100 -0.63376700  
 P -3.29967500 -3.75719600 -0.01517100  
 C -1.75121800 -4.55187500 -0.69120000  
 H -0.85614400 -3.93756600 -0.53180700  
 H -1.59983400 -5.52189700 -0.20532300  
 H -1.86737700 -4.73427900 -1.76513000  
 C -2.70076300 -3.34382300 1.70356100  
 H -1.77202500 -2.76043900 1.69633200  
 H -3.46475300 -2.77600900 2.24429900  
 H -2.53144200 -4.27455000 2.25637400  
 N -3.19164400 1.14275500 -0.62223600  
 H -4.15038800 -0.90645000 0.68985300  
 H -5.20468500 -1.50335300 -0.59263000

#### TS1-le

Ni 1.70418700 -0.01473400 0.69711100  
 C -0.03337200 -1.22969200 0.84805400  
 C -0.09533900 0.03020800 0.44610600  
 H -0.86788000 -1.92029100 0.92168200  
 O 0.87272900 -3.31835700 1.68069600  
 O 2.49252200 -1.75506000 1.38762700  
 C 1.31333800 -2.22906500 1.38027400  
 C 1.98797200 2.76170500 1.02793500  
 C 3.47049400 1.85372500 -0.53719900  
 C 2.53091000 4.03130700 0.89455000  
 H 1.16304700 2.56740200 1.70323000  
 C 4.05108800 3.11486000 -0.71640900  
 C 3.58629600 4.21265200 -0.00021400  
 H 2.12920000 4.85294000 1.47769900  
 H 4.86819600 3.21793500 -1.42326100  
 H 4.03526100 5.19179600 -0.13921600  
 C 3.99376200 0.64299800 -1.26933100  
 H 3.14740000 0.00203600 -1.54388200  
 H 4.47044700 0.97133700 -2.20060000

C 5.00638000 -0.16449400 -0.42605500  
 H 5.82236200 0.49650600 -0.10517500  
 H 4.51835700 -0.55882200 0.47345600  
 P 5.78793800 -1.57741800 -1.39495300  
 C 6.69839300 -2.38689100 0.01903500  
 H 6.04155500 -2.58919800 0.87322900  
 H 7.13012400 -3.33326100 -0.32428500  
 H 7.52359100 -1.74495700 0.34652900  
 C 4.32753700 -2.73456100 -1.51065400  
 H 3.78670200 -2.81387100 -0.56095600  
 H 3.63598700 -2.39365100 -2.28901200  
 H 4.68524800 -3.72692000 -1.80706900  
 N 2.44147800 1.69307700 0.33457800  
 C -1.15930400 0.96529100 -0.01874700  
 C -2.57739400 0.36842100 0.02012600  
 H -0.92069700 1.29106400 -1.04228600  
 H -1.13049500 1.87977700 0.59311800  
 C -3.64184400 1.37178800 -0.47400400  
 H -2.61348300 -0.53323000 -0.60153900  
 H -2.81817700 0.05805500 1.04312800  
 H -3.59727000 2.28397800 0.13910400  
 H -3.40154500 1.68380300 -1.50091100  
 C -4.99733600 0.82467100 -0.43486100  
 C -6.11669800 0.34515800 -0.39170900  
 Si -7.80407600 -0.38375800 -0.32470200  
 C -8.13216500 -1.00951800 1.42959800  
 H -9.13351700 -1.45186400 1.50470200  
 H -7.40536900 -1.77616100 1.72160600  
 H -8.07047600 -0.19560300 2.16114200  
 C -7.90109900 -1.81809000 -1.55372500  
 H -8.89473500 -2.28314500 -1.53313700  
 H -7.71181800 -1.47848000 -2.57851200  
 H -7.16406400 -2.59429400 -1.31803500  
 C -9.06577900 0.94952400 -0.78222200  
 H -10.08546400 0.54490900 -0.75900100  
 H -9.02459900 1.79271000 -0.08313500  
 H -8.88452500 1.34177900 -1.78951100

#### TS1-le'

Ni -1.27056600 0.56993800 0.24309500  
 C 0.56600900 1.64497600 0.09490700  
 C 0.52335200 0.31564600 0.11472700  
 H 1.48535300 2.22233800 0.03758000  
 O -0.16927200 3.93838300 0.06635700

|    |             |             |             |    |             |             |             |
|----|-------------|-------------|-------------|----|-------------|-------------|-------------|
| O  | -1.88875800 | 2.46769700  | 0.23543500  | H  | 10.16033100 | -0.12827500 | 1.50263600  |
| C  | -0.66814700 | 2.83212700  | 0.13860000  | H  | 8.60315800  | -0.00178100 | 2.33788700  |
| C  | -8.20448400 | -1.09171800 | -0.40876400 | H  | 9.11492400  | -1.55112800 | 1.65063200  |
| C  | -6.16495000 | -0.03078100 | -0.42886900 | C  | 8.28780200  | 1.86547100  | -0.37378500 |
| C  | -8.89307100 | 0.09632600  | -0.15634700 | H  | 9.31382900  | 2.25422700  | -0.38809200 |
| H  | -8.74683800 | -2.03095700 | -0.50982300 | H  | 7.80699800  | 2.15592800  | -1.31489400 |
| C  | -6.76541300 | 1.20754400  | -0.17273200 | H  | 7.75266700  | 2.36526100  | 0.44175300  |
| C  | -8.15196200 | 1.27056200  | -0.03554200 |    |             |             |             |
| H  | -9.97441600 | 0.09527700  | -0.05814400 |    |             |             |             |
| H  | -6.15425600 | 2.10124400  | -0.08532900 | Ni | -2.06971700 | -0.17438700 | -0.87483400 |
| H  | -8.64211400 | 2.22015500  | 0.16187600  | C  | 0.04773500  | -1.77148500 | -1.17974500 |
| C  | -4.66401200 | -0.16271500 | -0.59078100 | C  | -0.20331400 | -0.49218200 | -0.85806300 |
| H  | -4.45898800 | -0.54906300 | -1.59787500 | H  | 1.03745100  | -2.22295500 | -1.23290600 |
| H  | -4.18960100 | 0.82182500  | -0.51762500 | C  | 0.80211200  | 0.56181200  | -0.47716900 |
| C  | -4.06528400 | -1.12077700 | 0.45812700  | H  | 0.77045400  | 1.38603900  | -1.20653700 |
| H  | -4.24496600 | -0.72523800 | 1.46585100  | H  | 0.49813900  | 1.01485100  | 0.47888400  |
| H  | -4.56141600 | -2.09664000 | 0.39283900  | C  | 2.25198900  | 0.06263600  | -0.35803600 |
| P  | -2.23019500 | -1.33302200 | 0.29289000  | H  | 2.58671900  | -0.35368500 | -1.31471600 |
| C  | -1.80523900 | -2.46630800 | 1.68671000  | H  | 2.30552600  | -0.74928100 | 0.37569400  |
| H  | -2.41425000 | -3.37655600 | 1.65454600  | C  | 3.21413200  | 1.19475700  | 0.06532100  |
| H  | -0.74802600 | -2.74279500 | 1.63077300  | H  | 2.87109400  | 1.62773000  | 1.01652000  |
| H  | -1.97385300 | -1.95458000 | 2.63874100  | H  | 3.16872800  | 2.00907300  | -0.67280100 |
| C  | -2.01990100 | -2.40643500 | -1.19439100 | C  | 4.59800900  | 0.74468400  | 0.20918000  |
| H  | -2.61191700 | -3.32399100 | -1.10385100 | C  | 5.74364400  | 0.34619700  | 0.32659800  |
| H  | -2.33242900 | -1.86500200 | -2.09148000 | Si | 7.46953400  | -0.25844300 | 0.51388100  |
| H  | -0.96441000 | -2.67064800 | -1.30923300 | C  | 8.04189900  | 0.06475600  | 2.28802700  |
| N  | -6.87639300 | -1.16583300 | -0.54334900 | H  | 7.40610000  | -0.45775200 | 3.01200400  |
| C  | 1.54018900  | -0.77377500 | 0.06100900  | H  | 9.07226700  | -0.28256100 | 2.43568500  |
| C  | 2.99579500  | -0.27699100 | 0.00162500  | H  | 8.01183800  | 1.13380900  | 2.52823100  |
| H  | 1.33472000  | -1.40988100 | -0.81370100 | C  | 7.51437300  | -2.11296600 | 0.14628600  |
| H  | 1.41289800  | -1.42489900 | 0.93908800  | H  | 6.86515300  | -2.67098700 | 0.83066300  |
| C  | 4.00076500  | -1.44800700 | -0.05522700 | H  | 7.18013200  | -2.32465000 | -0.87584600 |
| H  | 3.13198200  | 0.36156600  | -0.87830000 | H  | 8.53247100  | -2.50792500 | 0.25395700  |
| H  | 3.20873600  | 0.34219600  | 0.88012300  | C  | 8.58268800  | 0.66929300  | -0.70253700 |
| H  | 3.84948200  | -2.10163600 | 0.81646100  | H  | 8.26272900  | 0.50645900  | -1.73814800 |
| H  | 3.79066700  | -2.06694100 | -0.93981300 | H  | 8.56692800  | 1.74900000  | -0.51424100 |
| C  | 5.39261200  | -1.00162900 | -0.09123600 | H  | 9.62252800  | 0.32962600  | -0.61638100 |
| C  | 6.54507100  | -0.60696500 | -0.11706300 | C  | -1.15086600 | -2.61482100 | -1.44559400 |
| Si | 8.28547900  | -0.01196400 | -0.14837600 | O  | -2.28031500 | -1.91434300 | -1.28771600 |
| C  | 9.19036000  | -0.84055100 | -1.58807200 | O  | -1.12808000 | -3.79412000 | -1.74937400 |

C -3.05464800 2.09109500 0.55393600  
 N -2.26900900 1.71815400 -0.48866500  
 H -3.02575700 5.46556500 0.10930500  
 H -1.16690000 2.29672700 -2.13590100  
 H -1.59955000 4.73715800 -1.83492200  
 H -3.96073200 3.71491500 1.62686600  
 C -3.62528300 0.99230400 1.41812300  
 H -2.79768300 0.37489700 1.79000600  
 H -4.11503700 1.43779600 2.29083200  
 C -4.63665700 0.09952700 0.66570500  
 H -4.16905300 -0.39077500 -0.20786700  
 H -5.45619100 0.71793900 0.27772200  
 P -5.38915800 -1.23824100 1.75737900  
 C -3.92475700 -2.38375000 1.91095200  
 H -3.19670700 -1.97619300 2.62088200  
 H -4.27099800 -3.34092400 2.31633700  
 H -3.43020600 -2.56028700 0.94856200  
 C -6.34550900 -2.14396600 0.43635300  
 H -5.71623600 -2.41560500 -0.41945100  
 H -6.76660900 -3.05967700 0.86481500  
 H -7.18031400 -1.52550200 0.08902300

#### TS2-1e

Ni 0.51959200 0.46998200 -0.70237000  
 O -1.12695300 1.11551500 -1.38722700  
 O -2.22263100 3.08477400 -1.52352800  
 C -1.19512400 2.42376200 -1.41351700  
 C 0.15807900 3.05889100 -1.32906000  
 C 1.24291500 2.42786700 -0.84156900  
 H 0.26617400 4.05025300 -1.77402200  
 C 2.60241700 3.09394000 -0.90719100  
 H 2.55963700 3.96781400 -1.56703900  
 H 3.33007600 2.39548200 -1.33943900  
 C 3.03174100 3.48025300 0.52826400  
 C 2.29678600 2.50423000 1.48371100  
 H 2.74575200 4.51280800 0.75073900  
 H 4.11725400 3.40637300 0.65018400  
 H 2.94248600 2.13251400 2.28622000  
 H 1.43471300 2.99393300 1.95066100  
 C 1.82755900 1.33749800 0.67562700  
 C 1.96956100 0.06893100 0.49259500  
 Si 2.89524400 -1.38549600 1.19916900  
 C 4.16772500 -0.77607000 2.46628900  
 H 3.68413800 -0.27689600 3.31438200

H 4.74789900 -1.61700300 2.86719300  
 H 4.87681700 -0.06893100 2.01985300  
 C 1.69408000 -2.57414200 2.05008800  
 H 0.97255700 -2.99719300 1.34304700  
 H 2.24189000 -3.40764900 2.50768100  
 H 1.13104300 -2.07017500 2.84421700  
 C 3.79179200 -2.27176500 -0.21283000  
 H 4.38403200 -3.11316200 0.16800900  
 H 3.08180100 -2.66820000 -0.94741600  
 H 4.47532200 -1.59468300 -0.73887400  
 C 0.48485000 -1.93700700 -2.19604400  
 C 0.09154400 -3.17433700 -2.68683700  
 C -0.93003000 -3.85425800 -2.02143300  
 C -1.51100200 -3.26112800 -0.90762900  
 C -1.07811400 -2.00220800 -0.46494300  
 N -0.07689900 -1.36271300 -1.11279700  
 H -1.26572800 -4.82815000 -2.36639400  
 H 1.27660200 -1.36963800 -2.67340500  
 H 0.57715500 -3.58833800 -3.56403100  
 H -2.30959700 -3.75883800 -0.36628400  
 C -1.74253800 -1.33049100 0.71145100  
 H -1.94673700 -2.08560400 1.48175700  
 H -1.04909500 -0.60315900 1.14444800  
 C -3.04775800 -0.61110400 0.30004000  
 H -3.79609400 -1.33554900 -0.05050600  
 H -2.80654700 0.06358300 -0.52651200  
 P -3.75000000 0.47176800 1.66424200  
 C -4.99708600 -0.69935200 2.42297200  
 H -4.47781500 -1.50175900 2.95950000  
 H -5.60927300 -0.15935100 3.15398700  
 H -5.66256500 -1.14914100 1.67486100  
 C -4.87798500 1.51884900 0.61346400  
 H -5.55777400 0.91623700 -0.00211800  
 H -5.47542400 2.17671400 1.25436300  
 H -4.26218400 2.14116500 -0.04576600

#### TS2-1e'

Ni 0.78523300 0.45679900 0.52003700  
 O -0.33954400 1.31460600 1.77278100  
 O -1.15470000 3.35845100 2.26119800  
 C -0.54171900 2.59524700 1.52956000  
 C 0.04439300 3.02686900 0.22481100  
 C 0.90614800 2.27285500 -0.47953200  
 H -0.31576300 3.97013100 -0.19027500

|   |             |             |            |
|---|-------------|-------------|------------|
| H | -0.80774800 | -3.78128800 | 1.11638100 |
| C | -0.27870500 | -1.50821600 | 3.04979100 |
| H | -1.01098100 | -2.23103200 | 3.42663600 |
| H | 0.72431500  | -1.81497200 | 3.36303400 |
| H | -0.48574200 | -0.51461800 | 3.45469500 |

## Ni -0.36852800 -0.65060900 -0.24920300

S29

H 4.19142800 -4.08308900 -1.95041500  
 H 0.08198600 -2.81869400 -2.06951900  
 H 1.88019200 -4.30684100 -2.93700900  
 H 4.56482900 -2.37166900 -0.17290500  
 C 2.76264100 -0.62912700 0.86428900  
 H 1.80285800 -0.33874000 1.30292200  
 H 3.38048500 -1.05050800 1.66856100  
 C 3.45934100 0.61511900 0.27116000  
 H 2.80823500 1.07605500 -0.47856400  
 H 4.39349300 0.31167700 -0.22105200  
 P 3.93455600 1.87939600 1.57990800  
 C 2.25566000 2.59447000 1.97892300  
 H 1.66565400 1.87748200 2.56052600  
 H 2.38964700 3.48723600 2.60051900  
 H 1.70707100 2.86478000 1.07032300  
 C 4.54174800 3.21724300 0.42715400  
 H 3.80510700 3.44259700 -0.35255100  
 H 4.74422700 4.12814500 1.00140500  
 H 5.48087400 2.90512400 -0.04329300

#### TS3-1e

Ni 0.06256900 0.07573900 0.12601600  
 O -0.61311500 -1.59509800 0.50313300  
 O 0.41349800 -3.34607700 -0.46904800  
 C -0.38015900 -2.42187700 -0.59282000  
 C -1.16432800 -2.15810000 -1.78704700  
 C -2.20876500 -1.27198400 -1.83561000  
 C -3.22793500 -1.15540900 -2.95167900  
 H -3.35481100 -2.08207600 -3.52110200  
 H -2.91405100 -0.37679900 -3.66385900  
 C -4.50836400 -0.71693300 -2.20589400  
 C -3.99977200 0.12870800 -1.01276000  
 H -5.02516800 -1.60629500 -1.82577600  
 H -5.21233000 -0.17266700 -2.84452900  
 H -3.95749200 1.19365700 -1.28903600  
 H -4.66349200 0.06118200 -0.14279100  
 C -2.60104500 -0.42609500 -0.74985200  
 C -1.80801000 -0.22325800 0.35913200  
 Si -2.35012000 0.24641200 2.11995700  
 C -3.72242300 -0.92025700 2.71066900  
 H -4.03590800 -0.66793200 3.73169300  
 H -4.61068500 -0.87937700 2.07026600  
 H -3.36413000 -1.95616700 2.71729100  
 C -2.98413500 2.03616100 2.06828800

H -2.20391600 2.72083700 1.71409200  
 H -3.85348200 2.14782700 1.40996200  
 H -3.28364900 2.36716400 3.07084500  
 C -0.89325700 0.12264000 3.31599000  
 H -0.11217700 0.85580800 3.08420200  
 H -1.22988300 0.30318800 4.34517700  
 H -0.43889300 -0.87302200 3.27627400  
 H -0.97030700 -2.83369400 -2.61473500  
 C -0.10731100 2.67099300 -1.01014600  
 C 0.32454000 3.89420400 -1.50764100  
 C 1.66596500 4.24089900 -1.34911600  
 C 2.51416600 3.34984900 -0.69558100  
 C 2.02078100 2.13485000 -0.21227900  
 N 0.71270300 1.80467000 -0.37820600  
 H 2.04420600 5.18765500 -1.72384700  
 H -1.13838700 2.34843900 -1.10756800  
 H -0.37885500 4.55272300 -2.00629300  
 H 3.56310100 3.58800400 -0.54988500  
 C 2.90755700 1.14561300 0.50877700  
 H 3.87187100 1.62495200 0.71335800  
 H 2.45535300 0.91183300 1.48195000  
 C 3.12861300 -0.17204800 -0.26362200  
 H 3.57725900 0.02808100 -1.24699100  
 H 2.15960500 -0.65990400 -0.45507000  
 P 4.14467900 -1.42262300 0.70768800  
 C 5.86468700 -0.89172400 0.19991300  
 H 6.11069900 0.07647400 0.65057900  
 H 6.59206600 -1.61994300 0.57540000  
 H 5.97890200 -0.81536900 -0.88902400  
 C 3.91262800 -2.89194000 -0.41081200  
 H 4.18891600 -2.67785100 -1.45134700  
 H 4.52970700 -3.72223700 -0.05005400  
 H 2.86290600 -3.20465400 -0.37504500

#### INT1-1f

Ni 0.54997700 -0.38463800 -0.09096400  
 C -0.95195800 0.84025500 0.06440600  
 C -1.32100400 -0.39296700 -0.04787100  
 C -2.46420900 -1.34844400 -0.11892300  
 H -2.35307900 -1.97264000 -1.01851400  
 H -2.39861000 -2.04744200 0.72928900  
 C -3.85270000 -0.68871000 -0.12754300  
 C -4.98814200 -1.72963000 -0.23290100  
 H -3.92094200 0.00953200 -0.96975100

H -3.98491500 -0.09606400 0.78405400  
 H -4.84975000 -2.32890400 -1.14461000  
 H -4.91537800 -2.43582200 0.60712400  
 C -6.32340900 -1.13054200 -0.24642300  
 C -7.41782300 -0.61919900 -0.25677800  
 H -8.38349700 -0.16818900 -0.26539400  
 Si -1.32669700 2.62446400 0.31752200  
 C -3.05101700 2.90125000 1.06813000  
 H -3.14837900 2.39155000 2.03434100  
 H -3.23967600 3.96980900 1.23574500  
 H -3.84276900 2.52166600 0.41211300  
 C -0.04912300 3.39280400 1.49185300  
 H 0.96893000 3.29106500 1.09843100  
 H -0.24490100 4.46087700 1.65204500  
 H -0.07431100 2.89723100 2.46993600  
 C -1.25756000 3.54718500 -1.34525400  
 H -0.26499400 3.48591700 -1.80820200  
 H -1.97848400 3.12902200 -2.05791200  
 H -1.49471500 4.61104900 -1.21467700  
 C 2.39166400 1.63645100 -1.00277000  
 C 3.45450500 0.17212300 0.45081100  
 C 3.56303700 2.34543700 -1.24375700  
 H 1.45736500 1.91730100 -1.47435600  
 C 4.66569100 0.84617900 0.25896600  
 C 4.72958200 1.94534300 -0.59349700  
 H 3.54964400 3.19503800 -1.91894100  
 H 5.55170800 0.50157800 0.78389200  
 H 5.66542400 2.47602200 -0.74407300  
 C 3.39143200 -1.04746600 1.34219400  
 H 4.34265600 -1.13568300 1.87994000  
 H 2.60694600 -0.90187800 2.09617000  
 C 3.12214800 -2.35798700 0.56232000  
 H 3.80483800 -2.42299600 -0.29402700  
 H 3.33151900 -3.22108100 1.20626900  
 P 1.35320000 -2.42718900 -0.05844200  
 C 0.59535000 -3.62895600 1.13901100  
 H 1.14499000 -4.57729200 1.17967000  
 H 0.57525500 -3.18344600 2.13888400  
 H -0.43977000 -3.82938400 0.84482200  
 C 1.52096100 -3.50782100 -1.56133000  
 H 0.52390400 -3.73447700 -1.95308100  
 H 2.06950900 -2.96644700 -2.33897200  
 H 2.03894300 -4.45082000 -1.34799400  
 N 2.31920000 0.57118400 -0.17539400

# **TS1-If**

C 3.52162800 1.18842300 0.01773000  
 H 4.02775400 0.27699300 -0.31849700  
 H 3.15082400 1.68624500 -0.88655100  
 C 4.53675600 2.10985000 0.72743700  
 H 4.92139900 1.60512100 1.62510100  
 H 4.02249400 3.01352700 1.08553200  
 C 5.65467600 2.49473200 -0.13413000  
 C 6.56718400 2.80202300 -0.86307900  
 Si 2.27490600 -2.79401500 0.37912900  
 C 1.18921000 -4.29303000 0.76230400  
 H 0.65176500 -4.62839700 -0.12810900  
 H 1.81010300 -5.12160500 1.12662000  
 H 0.45425400 -4.06390200 1.54364800  
 C 3.54865600 -3.15614400 -0.96893100  
 H 3.04579900 -3.40117700 -1.90734900  
 H 4.20245800 -2.29292300 -1.14305700  
 H 4.18569300 -4.00112000 -0.67641000  
 C 3.21332700 -2.36657400 1.97802700  
 H 3.98819000 -1.60534500 1.83193500  
 H 2.54366100 -2.02582600 2.77681400  
 H 3.71916600 -3.27036600 2.34229400  
 C 2.34094300 0.81793200 0.93788900  
 H 1.86080000 1.73746800 1.29787000  
 H 2.72276900 0.30090500 1.82798300  
 C 1.32318600 -0.04038200 0.25995900  
 C 1.16861000 -1.30671200 -0.11556500  
 C -0.16422700 2.99856200 -0.61221600  
 C -0.53659800 4.33451200 -0.56162100  
 C -1.74647100 4.66597400 0.04897800  
 C -2.52853400 3.64373000 0.57729300  
 C -2.10598500 2.31266200 0.49226200  
 N -0.92340900 2.00282500 -0.10106000  
 H -2.07195600 5.70005700 0.11456000  
 H 0.76730900 2.68996000 -1.07177100  
 H 0.11225500 5.09064400 -0.99059600  
 H -3.47469200 3.86201200 1.06241400  
 Ni -0.37681500 0.19544300 -0.31864400  
 C -2.96201300 1.18554000 1.01463600  
 H -2.31120900 0.42985700 1.47168600  
 H -3.61662300 1.57231000 1.80467100  
 C -3.81893700 0.53462600 -0.09430900  
 H -3.17369000 0.09288100 -0.86378200

H -4.43492200 1.30546500 -0.57622300  
P -4.99749400 -0.77191100 0.57479500  
C -3.78366700 -2.13413700 0.97296000  
H -3.27296100 -1.91831500 1.91793200  
H -4.33710200 -3.06999000 1.11002700  
H -3.03416700 -2.26732700 0.18474000  
C -5.63712900 -1.40691100 -1.05968500  
H -4.82720000 -1.68659300 -1.74361300  
H -6.26811800 -2.28492800 -0.88389700  
H -6.25891800 -0.64170200 -1.53730600  
C 0.00883700 -1.90765800 -1.27384200  
O -1.16336800 -1.43077600 -1.29887900  
O 0.52708400 -2.79603400 -1.93002000  
H 7.37682300 3.07112700 -1.50234100

#### TS4-1f

C 3.53151800 -0.53925100 -0.08223100  
H 3.75903500 0.29406400 0.59088500  
H 3.14136000 -1.34615200 0.54865300  
C 4.82470600 -1.00968800 -0.78234000  
H 5.22309700 -0.19171600 -1.39930700  
H 4.58731500 -1.82599200 -1.48017900  
C 5.85304800 -1.45721900 0.15724600  
C 6.68867300 -1.82465500 0.94806900  
Si 0.71326400 3.22097600 -0.52969600  
C -1.04615200 3.86365000 -0.80343800  
H -1.60091800 3.85868800 0.13877300  
H -1.02885400 4.89018800 -1.19154200  
H -1.58609300 3.24100600 -1.52746600  
C 1.64155300 4.29924600 0.71829800  
H 1.15352900 4.25534300 1.69616100  
H 2.67978300 3.96623900 0.83862200  
H 1.66520600 5.34602400 0.38866700  
C 1.62893200 3.31462700 -2.19601400  
H 2.68707800 3.04038900 -2.10594900  
H 1.17422700 2.65901100 -2.94869900  
H 1.59461200 4.33952000 -2.58809400  
C 2.45838000 -0.10251200 -1.10249100  
H 2.25783500 -0.93226700 -1.79260000  
H 2.85815600 0.72726600 -1.70279800  
C 1.20496200 0.33061600 -0.42256500  
C 0.64449100 1.42889100 0.05236700  
C -3.07394200 0.80210400 0.65654400  
C -4.44799900 1.02114900 0.68462600

C -5.28092900 0.14332600 -0.00197500  
C -4.69774700 -0.91986800 -0.68660200  
C -3.30972800 -1.08860800 -0.67454200  
N -2.50162600 -0.22907200 -0.00367000  
H -6.35872000 0.27996100 -0.00808500  
H -2.39875200 1.47563900 1.17212400  
H -4.84049100 1.86955500 1.23533600  
H -5.31140600 -1.62707400 -1.23612600  
Ni -0.45593400 -0.34417400 -0.00699100  
C -2.69476700 -2.25942900 -1.41137100  
H -3.49600100 -2.79167800 -1.93595600  
H -2.00796700 -1.88345000 -2.18164500  
C -1.94559200 -3.24569300 -0.48742100  
H -1.78300200 -4.19680900 -1.00841900  
H -2.55382600 -3.46203500 0.39881800  
P -0.31124300 -2.52579000 0.05800000  
C 0.89687300 -3.48660700 -0.96804200  
H 0.75958800 -3.24821400 -2.02779100  
H 1.91759300 -3.21041000 -0.68764300  
H 0.77293100 -4.56661800 -0.82607900  
C -0.04476800 -3.24327300 1.73884200  
H -0.12478600 -4.33654900 1.73874900  
H 0.94586300 -2.95004000 2.09851900  
H -0.77903700 -2.81812700 2.42894900  
C -0.02906200 1.32467300 1.81707800  
O -0.63474600 2.35700800 2.06749300  
O 0.31094200 0.29453600 2.37891200  
H 7.42885200 -2.14341400 1.64584200

#### INT8-1gh

C 0.09529900 -3.71738900 1.56623400  
C -1.34522000 -4.00367700 1.11010600  
H 0.29064700 -4.22935500 2.51869100  
H 0.79318000 -4.14926700 0.83266900  
C -1.67554300 -3.30951400 -0.22119200  
H -1.48386600 -5.08627600 1.00090200  
H -2.04586300 -3.66014000 1.88138100  
H -1.00492200 -3.69917500 -1.00225000  
H -2.69727300 -3.56802800 -0.53101100  
C 0.38471100 -2.27261300 1.71239800  
C 0.95286300 -1.24484100 2.17131100  
C -1.54109800 -1.83392500 -0.16730700  
C -1.85770300 -0.65279700 -0.49630300  
Si -2.93390000 0.54894800 -1.38826600



H 1.66396900 -0.78132200 2.83501000  
 Ni -0.36117500 -0.64848500 0.86531900  
 C -4.15065000 -0.39952900 -2.49419000  
 H -4.80936100 0.28676200 -3.04194000  
 H -3.62002400 -1.01236100 -3.23253100  
 H -4.78539700 -1.06888600 -1.90130400  
 C -3.91150000 1.58092800 -0.13510100  
 H -3.24201400 2.16778600 0.50418900  
 H -4.58909000 2.27975500 -0.64201800  
 H -4.51746000 0.93892900 0.51520100  
 C -1.89848300 1.70793800 -2.47364100  
 H -2.54771900 2.36653900 -3.06468800  
 H -1.24246100 2.34360200 -1.86829100  
 H -1.26949700 1.14575200 -3.17389600  
 C -0.71733300 1.94974000 2.06965800  
 C -0.58507200 3.30633200 2.34066200  
 C 0.27536000 4.06257600 1.54361400  
 C 0.96272800 3.42144400 0.51871100  
 C 0.78606300 2.04803500 0.30110200  
 N -0.05615700 1.32312600 1.07436000  
 H 0.40491700 5.12736300 1.71605500  
 H -1.14803300 3.75265700 3.15403000  
 H 1.64032300 3.97355500 -0.12600400  
 H -1.37685500 1.32124500 2.65874000  
 C 1.55319800 1.33354700 -0.78539500  
 C 2.93992600 0.85670000 -0.30398500  
 P 3.95383800 0.06503200 -1.67285500  
 C 3.10075700 -1.59126400 -1.79721100  
 C 5.43917100 -0.43748900 -0.65769400  
 H 5.16318500 -0.99434800 0.24629500  
 H 6.10159200 -1.06335000 -1.26567900  
 H 6.00363800 0.45412100 -0.36329100  
 H 3.70534500 -2.26223200 -2.41774300  
 H 2.94289500 -2.05451000 -0.81593500  
 H 2.12791000 -1.47536200 -2.28581900  
 H 0.95715000 0.47638500 -1.11480200  
 H 1.67812900 2.00669400 -1.64261700  
 H 2.81755000 0.15722400 0.53233500  
 H 3.51758400 1.71600400 0.06276700

# **INT8-Igh'**

C 3.02941000 2.97126200 -1.66001600  
 C 4.10610100 1.87928200 -1.76564500  
 H 3.50288600 3.94195700 -1.45862000

H 2.52171400 3.06782400 -2.63166000  
 C 3.48607500 0.49742400 -2.02339500  
 H 4.80038400 2.12792700 -2.57742600  
 H 4.68683100 1.84919100 -0.83518400  
 H 2.96045700 0.51708000 -2.99035400  
 H 4.28101500 -0.25508200 -2.11637900  
 C 2.01626500 2.69472200 -0.61800900  
 C 1.14045400 2.97211700 0.24281600  
 C 2.53159700 0.07064100 -0.97086300  
 C 1.95742400 -0.82198800 -0.27194600  
 Si 1.94136900 -2.64628000 0.02892300  
 H 0.56744200 3.70555500 0.78278400  
 Ni 1.31211500 1.02995700 0.22383300  
 C 2.86831900 -3.49683600 -1.39310200  
 H 2.90768100 -4.58379400 -1.24595200  
 H 2.37965000 -3.30827400 -2.35637400  
 H 3.90069700 -3.13459000 -1.46765100  
 C 2.83319100 -3.05675200 1.65136900  
 H 2.36504600 -2.57598600 2.51706800  
 H 2.83789500 -4.13954200 1.83104000  
 H 3.87606600 -2.72018600 1.61362800  
 C 0.17935500 -3.34696200 0.07331500  
 H 0.20599100 -4.44214600 0.13973400  
 H -0.39926500 -2.98172500 0.92898200  
 H -0.37174500 -3.08354000 -0.83744500  
 C -5.97135000 -0.06081100 -0.19612500  
 C -6.16469600 -0.66827900 -1.43825400  
 C -5.06828500 -0.77227800 -2.29258300  
 C -3.83850400 -0.26864400 -1.87084500  
 C -3.74057300 0.32542300 -0.60575200  
 N -4.79784700 0.42577900 0.21989700  
 H -5.16765200 -1.23528600 -3.27099200  
 H -7.14337700 -1.04363700 -1.72189000  
 H -2.96262200 -0.33020600 -2.51070600  
 H -6.80301100 0.04262900 0.50002800  
 C -2.42874400 0.87135300 -0.08439000  
 C -1.86564500 0.00173000 1.05665200  
 P -0.25744500 0.64187300 1.75046300  
 C 0.05710800 -0.57763000 3.11219900  
 C -0.85177800 2.08139800 2.76230000  
 H -1.63254500 1.78056300 3.47005400  
 H -0.01115700 2.50785200 3.31951000  
 H -1.25467400 2.86248600 2.11081600  
 H 0.92080000 -0.24686300 3.69835400

H -0.80876100 -0.67511100 3.77752300  
H 0.29398800 -1.55589000 2.68811600  
H -1.69345600 0.93595400 -0.89364600  
H -2.60303000 1.89041600 0.28143800  
H -1.67255700 -1.01020200 0.68224500  
H -2.61080200 -0.07783300 1.85814400

#### TS7-lgh

C 1.95445200 1.62494500 3.13894500  
C 3.42341200 1.45561900 2.72671700  
H 1.76174100 1.38862800 4.19031500  
H 1.64014000 2.66650600 2.97571300  
C 3.36102800 1.30955200 1.20455600  
H 4.04557200 2.29759700 3.04948800  
H 3.83366600 0.54192600 3.17510000  
H 3.24703200 2.30189200 0.74164800  
H 4.25436800 0.85204700 0.77422400  
C 1.16917100 0.71388000 2.20536200  
C -0.04257700 0.20176100 2.36984300  
C 2.11470300 0.45911100 0.89553700  
C 1.86573000 -0.29307700 -0.18572300  
Si 2.78424500 -0.71116300 -1.72467800  
H -0.73221400 0.29847600 3.20186400  
Ni 0.12064300 -0.61671700 0.71533900  
C 2.89017600 -2.60357500 -1.86146900  
H 3.38885300 -2.91333900 -2.78885700  
H 3.45369000 -3.02886900 -1.02164100  
H 1.88970900 -3.05193200 -1.84783200  
C 1.79585100 -0.05294700 -3.21126200  
H 1.71316400 1.04095700 -3.18244300  
H 2.27555200 -0.32343400 -4.16068800  
H 0.77921700 -0.46396100 -3.22087100  
C 4.56113500 -0.03114800 -1.88417400  
H 5.00188200 -0.32043300 -2.84756400  
H 4.58684100 1.06391300 -1.82724000  
H 5.21829700 -0.42007400 -1.09628800  
C -2.42778700 -1.35406900 -0.32271600  
C -3.52677700 -2.20804300 -0.46656900  
C -3.62147000 -3.37175300 0.28948900  
C -2.59790700 -3.66300700 1.19372600  
C -1.53090100 -2.78376100 1.29676200  
N -1.43409400 -1.65604100 0.55340800  
H -4.47214500 -4.03733700 0.17651100  
H -4.30085800 -1.94464400 -1.18078900

H -2.61851400 -4.55572000 1.80990600  
H -0.71031800 -2.96541200 1.98096200  
C -2.31995500 -0.07489400 -1.11183700  
C -2.83472000 1.14978300 -0.32377800  
P -2.82374000 2.72519100 -1.34857500  
C -3.44340100 3.90638700 -0.04164100  
C -1.00626400 3.14498600 -1.29732300  
H -3.87637000 0.97634600 -0.02162200  
H -2.24234400 1.27928100 0.59134500  
H -0.43691600 2.43219800 -1.90237600  
H -0.85565600 4.14056600 -1.72958500  
H -0.60219800 3.13516400 -0.27797500  
H -2.88159200 3.82938400 0.89763300  
H -3.36268300 4.93361500 -0.41361900  
H -4.50152900 3.71023600 0.16326300  
H -1.26754500 0.07509100 -1.38486800  
H -2.89490900 -0.17838200 -2.03962700

#### TS7-lgh'

C -1.94538900 3.52944500 -0.87504300  
C -3.45315600 3.44603700 -0.58704100  
H -1.70427900 4.00648100 -1.83044300  
H -1.44668800 4.11010900 -0.08478800  
C -3.56898100 2.31835500 0.44413000  
H -3.86135800 4.39791700 -0.22983700  
H -3.99125100 3.17205700 -1.50340700  
H -3.31372000 2.70369000 1.44356800  
H -4.57142500 1.88969300 0.50863800  
C -1.45841600 2.08753600 -0.81700700  
C -0.35399600 1.57903500 -1.35771200  
C -2.53670200 1.25398700 0.02916200  
C -2.51988700 -0.06196100 0.30120600  
Si -3.62499600 -1.18971500 1.24740900  
H 0.40123700 2.08080200 -1.95272600  
Ni -0.80305300 -0.09265000 -0.71602500  
C -4.09603000 -2.65527600 0.13125700  
H -4.72016500 -3.38340500 0.66517800  
H -4.65709100 -2.31757000 -0.74908500  
H -3.20056700 -3.17559000 -0.22859000  
C -2.65695000 -1.85769200 2.74300600  
H -2.39298800 -1.04939400 3.43625500  
H -3.24397500 -2.59769400 3.30205100  
H -1.72363900 -2.33672300 2.42382600  
C -5.25571000 -0.45200500 1.91468300

|   |             |             |             |
|---|-------------|-------------|-------------|
| H | -5.82581900 | -1.21039100 | 2.46774800  |
| H | -5.07754200 | 0.38704500  | 2.59818500  |
| H | -5.89940300 | -0.08889700 | 1.10363200  |
| C | 4.21654400  | 0.41914300  | 0.47895600  |
| C | 4.28275800  | 1.04497400  | 1.72981700  |
| C | 5.49221400  | 1.04687700  | 2.42427400  |
| C | 6.59745800  | 0.42272700  | 1.84868200  |
| C | 6.43445000  | -0.17747500 | 0.59852900  |
| N | 5.28110300  | -0.18574600 | -0.07717100 |
| H | 5.56828300  | 1.52787600  | 3.39588400  |
| H | 3.40036200  | 1.52212700  | 2.14677400  |
| H | 7.56050700  | 0.39887700  | 2.34960000  |
| H | 7.27363100  | -0.67521200 | 0.11415200  |
| C | 2.93103900  | 0.37388900  | -0.32067700 |
| C | 2.39934700  | -1.06553300 | -0.44964400 |
| P | 0.83918300  | -1.21947100 | -1.44422900 |
| C | 1.38356500  | -0.92753800 | -3.18632600 |
| C | 0.54117700  | -3.04406100 | -1.41768400 |
| H | 3.17306400  | -1.70189700 | -0.89681200 |
| H | 2.17529800  | -1.46915700 | 0.54551700  |
| H | 0.29810800  | -3.35374200 | -0.39711900 |
| H | -0.31570300 | -3.28115900 | -2.05536700 |
| H | 1.41906400  | -3.60005400 | -1.76761700 |
| H | 2.22407100  | -1.57723500 | -3.45496200 |
| H | 0.54584400  | -1.12541600 | -3.86209300 |
| H | 1.68101200  | 0.11641200  | -3.31609200 |
| H | 2.16950800  | 1.01113800  | 0.14071400  |
| H | 3.13556200  | 0.77904200  | -1.31957700 |

**INT9-1gh**

|    |             |             |             |
|----|-------------|-------------|-------------|
| C  | -2.13978400 | 0.32708700  | -3.48606700 |
| C  | -3.63500000 | 0.16976900  | -3.09079900 |
| H  | -1.86915600 | -0.25495300 | -4.37439400 |
| H  | -1.92305500 | 1.38191700  | -3.71491700 |
| C  | -3.68762200 | 0.47718000  | -1.56967200 |
| H  | -4.30184200 | 0.80730400  | -3.68206800 |
| H  | -3.94159000 | -0.87060600 | -3.25807300 |
| H  | -3.78301200 | 1.56284900  | -1.41107400 |
| H  | -4.54361300 | 0.00739600  | -1.07160800 |
| C  | -1.41839900 | -0.10089300 | -2.22315600 |
| C  | -0.19175800 | -0.56676400 | -1.93334800 |
| C  | -2.33769000 | -0.01318600 | -1.06957400 |
| C  | -1.82963500 | -0.40763100 | 0.11997700  |
| Si | -2.64528400 | -0.55230600 | 1.78555400  |

|    |             |             |             |
|----|-------------|-------------|-------------|
| H  | 0.61225800  | -0.72889700 | -2.65716000 |
| Ni | 0.01584100  | -0.91620700 | -0.08070100 |
| C  | -3.93820900 | -1.94857800 | 1.82510600  |
| H  | -4.36707600 | -2.07587900 | 2.82766900  |
| H  | -4.76424400 | -1.74299400 | 1.13330800  |
| H  | -3.49209100 | -2.90512200 | 1.52672300  |
| C  | -1.28414100 | -0.98829200 | 3.04995500  |
| H  | -0.53367100 | -0.18946500 | 3.12332500  |
| H  | -1.69727400 | -1.13766600 | 4.05547600  |
| H  | -0.76244200 | -1.91637800 | 2.77587600  |
| C  | -3.47582400 | 1.06106500  | 2.36045100  |
| H  | -3.90907300 | 0.95615700  | 3.36379400  |
| H  | -2.75368200 | 1.88598900  | 2.39217500  |
| H  | -4.28275400 | 1.35742300  | 1.67929700  |
| C  | 2.18841200  | -2.71555500 | -0.66153300 |
| C  | 3.46257800  | -3.26605000 | -0.73586300 |
| C  | 4.52792800  | -2.53976200 | -0.20359700 |
| C  | 4.27371400  | -1.29867000 | 0.37405400  |
| C  | 2.96623500  | -0.80152700 | 0.41598200  |
| N  | 1.93830100  | -1.51761300 | -0.09732200 |
| H  | 5.53994100  | -2.93345200 | -0.23758700 |
| H  | 3.60907600  | -4.23635300 | -1.19860900 |
| H  | 5.07974900  | -0.70612900 | 0.79566600  |
| H  | 1.32275700  | -3.23183700 | -1.06482900 |
| C  | 2.65965700  | 0.55964700  | 0.99413700  |
| C  | 2.47545900  | 1.63028600  | -0.10283600 |
| P  | 2.18582900  | 3.34912000  | 0.60027000  |
| C  | 0.44822800  | 3.14759500  | 1.25537200  |
| C  | 1.80872300  | 4.23070600  | -1.00138900 |
| H  | 3.38492700  | 1.68286500  | -0.71622900 |
| H  | 1.64556100  | 1.34115500  | -0.76102200 |
| H  | 1.03294300  | 3.72372900  | -1.58777500 |
| H  | 1.47555000  | 5.25148600  | -0.78473200 |
| H  | 2.71934100  | 4.30073100  | -1.60646000 |
| H  | 0.02664000  | 4.13919200  | 1.45502600  |
| H  | -0.20957600 | 2.61234200  | 0.55997100  |
| H  | 0.46701700  | 2.60587500  | 2.20711600  |
| H  | 3.47042100  | 0.85497300  | 1.67038200  |
| H  | 1.74561700  | 0.49236300  | 1.59662000  |

**INT9-1gh'**

|   |             |             |             |
|---|-------------|-------------|-------------|
| C | -1.88548000 | -3.14835000 | -1.99331100 |
| C | -2.87064900 | -3.76155800 | -0.95872000 |
| H | -0.98755300 | -3.75886200 | -2.14284300 |



H -2.62611200 4.65905400 -1.76991400  
H -3.48112900 2.98716500 -0.12889500  
H -0.40039300 4.22654300 -2.87704600  
H 0.84257400 2.15827300 -2.25278400  
C -2.31801200 0.66611000 0.64910800  
C -3.55054400 -0.10505900 0.13018900  
P -4.42504900 -1.06544800 1.49119400  
C -5.61076200 -2.03485300 0.42375300  
C -3.17034500 -2.40087700 1.84231900  
H -2.58738200 1.19610100 1.57256000  
H -1.51477600 -0.03038100 0.90626700  
H -4.29118500 0.60205800 -0.26643700  
H -3.25425500 -0.76436200 -0.69371400  
H -2.32455900 -1.98477400 2.39990600  
H -3.63497500 -3.16259200 2.47852800  
H -2.78629400 -2.88532500 0.93725100  
H -5.10396400 -2.56877500 -0.38920200  
H -6.14279600 -2.76468400 1.04357100  
H -6.35735900 -1.35968800 -0.00866200  
H 1.36075000 -2.28197800 -2.57164800

#### TS8-1g'

C -3.69509100 1.82022700 -1.65703200  
C -3.51390000 3.35783900 -1.54412500  
H -4.69162200 1.49088900 -1.34407800  
H -3.56750400 1.49603900 -2.70046400  
C -1.99207600 3.56920000 -1.31765600  
H -3.89355800 3.89845900 -2.41757400  
H -4.05943900 3.72389600 -0.66597900  
H -1.46562700 3.56221200 -2.28400700  
H -1.75401800 4.51557900 -0.82111100  
C -2.56306000 1.26373400 -0.79940900  
C -2.27026700 0.04081600 -0.29126600  
C -1.62703300 2.34665700 -0.50446300  
C -0.67140500 2.10452600 0.42045200  
Si -3.47009000 -1.40012600 -0.16027100  
Ni -0.57431300 0.14677500 0.64115300  
C -0.56810500 1.35536600 2.40812900  
O 0.47560600 0.68762400 2.35600200  
O -1.34298500 1.92211500 3.10946100  
C -5.05053100 -0.81293800 0.71723800  
H -5.57046100 -0.02528100 0.16104100  
H -5.75420800 -1.64513700 0.84891100  
H -4.81388100 -0.41313500 1.71035100

C -3.94231300 -2.10852500 -1.86252400  
H -4.64437300 -2.94585000 -1.75732200  
H -4.42616800 -1.34822500 -2.48721100  
H -3.06714200 -2.47438700 -2.41236200  
C -2.77371600 -2.80807500 0.90953300  
H -2.00573500 -3.39927900 0.39906400  
H -2.34165600 -2.42651200 1.84272700  
H -3.58221800 -3.49879100 1.18045500  
C 4.47773700 0.04776400 0.01432100  
C 4.88588000 1.38218300 0.13100300  
C 6.15099700 1.74782100 -0.32788000  
C 6.96912200 0.77014100 -0.89117800  
C 6.47489800 -0.53339600 -0.96808800  
N 5.26496500 -0.89631100 -0.53094200  
H 6.49013700 2.77708800 -0.24538100  
H 4.22198100 2.11624300 0.57879300  
H 7.96232800 1.00535600 -1.26159100  
H 7.08280600 -1.32700300 -1.40089400  
C 3.11835600 -0.41161200 0.50136800  
C 2.28407600 -1.01497600 -0.64387200  
P 0.61653200 -1.67450100 -0.13665300  
C 0.09356700 -2.51771800 -1.69559600  
C 1.05696000 -3.08354400 0.97964500  
H 2.58192600 0.41783600 0.97090900  
H 3.27389300 -1.17155100 1.27778800  
H 2.10108000 -0.25470100 -1.41382700  
H 2.85460800 -1.82536000 -1.11398700  
H 1.45196800 -2.69336900 1.92210400  
H 0.16149100 -3.66851800 1.20638700  
H 1.80677500 -3.73598600 0.51800000  
H 0.86525300 -3.21248300 -2.04535600  
H -0.83727900 -3.06773000 -1.53719500  
H -0.08782000 -1.76171300 -2.46550700  
H 0.14221300 2.80433500 0.61989500

#### TS8-1h

C 1.32695000 1.94137900 3.10237400  
C 2.84626200 2.14565100 2.86522300  
H 1.10213400 1.59647000 4.11783100  
H 0.78412100 2.88759300 2.95948900  
C 3.05286700 1.89904400 1.34714900  
H 3.20473500 3.12898300 3.18738200  
H 3.40571200 1.38977200 3.42955800  
H 2.83067300 2.81747900 0.78369000

H 4.07602400 1.60499000 1.09382400  
 C 0.94893500 0.93715800 2.02587400  
 C -0.16167800 0.22501100 1.73539400  
 C 2.02180800 0.82701200 1.03992500  
 C 1.91064700 -0.10989500 0.04570600  
 Si 2.77162900 -0.04749800 -1.63698600  
 H -1.06607600 0.26586100 2.35079300  
 Ni 0.10835400 -0.94622100 0.26894800  
 C 1.93032600 -2.15225200 0.42665200  
 O 1.14401100 -2.59470500 -0.42546000  
 O 2.76861700 -2.43455600 1.22184500  
 C 4.17113000 -1.32163200 -1.78968800  
 H 3.79438300 -2.34864900 -1.72843100  
 H 4.68463300 -1.21313300 -2.75378400  
 H 4.91650500 -1.19553400 -0.99586600  
 C 1.48146900 -0.39911200 -2.98703500  
 H 1.94887300 -0.36350000 -3.97951200  
 H 1.03330600 -1.39075100 -2.86265900  
 H 0.67459400 0.34484400 -2.97730700  
 C 3.50429200 1.67168400 -1.99061000  
 H 2.75631600 2.46561400 -1.87913800  
 H 4.34766200 1.91197100 -1.33417400  
 H 3.87276000 1.70832800 -3.02408300  
 C -2.78236800 -1.22054700 -0.39139700  
 C -4.02099900 -1.87442700 -0.38132500  
 C -4.16230800 -3.09089600 0.27789300  
 C -3.05068000 -3.64340300 0.91514800  
 C -1.84931300 -2.94843300 0.86348700  
 N -1.71461600 -1.76458500 0.23356200  
 H -5.11977000 -3.60406400 0.28730600  
 H -4.86122300 -1.42181400 -0.89919400  
 H -3.10491500 -4.59380600 1.43530900  
 H -0.94979200 -3.34256100 1.32454300  
 C -2.61596700 0.11077800 -1.08522900  
 C -3.08482300 1.29176900 -0.20949900  
 P -3.03708900 2.93876900 -1.11518600  
 C -3.49193300 4.04599800 0.31792300  
 C -1.19437000 3.23787100 -1.15075000  
 H -3.18908600 0.09885800 -2.02086600  
 H -1.56100700 0.24028100 -1.34995300  
 H -4.12631800 1.12905300 0.09863600  
 H -2.47366600 1.34039300 0.69985500  
 H -0.72571800 2.61118100 -1.91655900  
 H -1.00664900 4.28263900 -1.42247800

H -0.71710500 3.02665500 -0.18637100  
 H -2.86656600 3.87093600 1.20203100  
 H -3.38437900 5.09327700 0.01528700  
 H -4.54075900 3.88589600 0.59061900

# **TS8-1h'**

C -1.45980500 2.59396300 -2.77750600  
 C -2.84396500 3.14307400 -2.34565900  
 H -1.42068900 2.33538400 -3.84169800  
 H -0.67641800 3.34613900 -2.60244200  
 C -2.96707400 2.77571300 -0.84414300  
 H -2.95890600 4.21630800 -2.53090300  
 H -3.63124300 2.62531200 -2.90719600  
 H -2.44841700 3.52851600 -0.23200700  
 H -4.00298200 2.73352600 -0.49615800  
 C -1.26769600 1.39746200 -1.86034400  
 C -0.35138600 0.41204700 -1.79046900  
 C -2.24618100 1.43748100 -0.76688100  
 C -2.31038000 0.39989200 0.11339500  
 Si -2.96978400 0.45652000 1.88033300  
 H 0.46881600 0.33785500 -2.51133900  
 Ni -0.76167400 -0.82703700 -0.40978300  
 C -2.73894400 -1.64355100 -0.38252700  
 O -1.98419000 -2.27136500 0.37729500  
 O -3.70473900 -1.69226500 -1.07224000  
 C -4.52866600 -0.59847500 2.12973900  
 H -4.33642200 -1.66444800 1.96551400  
 H -4.90143900 -0.48359700 3.15583500  
 H -5.33051700 -0.29706700 1.44576400  
 C -1.60472100 -0.19305900 3.03295400  
 H -1.93145200 -0.15083300 4.07994900  
 H -1.35414400 -1.23378600 2.80104400  
 H -0.68941900 0.40595300 2.94631600  
 C -3.38020400 2.22880100 2.43630900  
 H -2.53445500 2.91087500 2.29068000  
 H -4.24281800 2.64677200 1.90592800  
 H -3.62257300 2.22840200 3.50708100  
 C 4.14679400 0.58061300 0.63427100  
 C 4.18953700 1.97780300 0.55351300  
 C 5.42729600 2.62032300 0.56845400  
 C 6.58337000 1.84764200 0.66179200  
 C 6.44111000 0.46052300 0.73507600  
 N 5.26084700 -0.16699500 0.72244600  
 H 5.48578800 3.70393700 0.50898400

H 3.26718400 2.54731900 0.48226600  
 H 7.56955300 2.30161800 0.67817500  
 H 7.31968300 -0.17900600 0.80977900  
 C 2.83471100 -0.17619200 0.61532900  
 C 2.71749400 -1.07954100 -0.62709800  
 P 1.13302100 -2.04011200 -0.68399400  
 C 1.24036700 -2.92286600 -2.30285500  
 C 1.37092900 -3.39698300 0.54751700  
 H 1.99308300 0.52472000 0.63960400  
 H 2.77792100 -0.78994100 1.52344100  
 H 2.74499900 -0.46163700 -1.53319200  
 H 3.57278800 -1.76413700 -0.66869500  
 H 1.46227200 -2.97593900 1.55332000  
 H 0.48860000 -4.04417100 0.53597400  
 H 2.26413900 -3.99237700 0.32797300  
 H 2.18966100 -3.45975900 -2.40796100  
 H 0.41441900 -3.63683600 -2.38002800  
 H 1.14150600 -2.20169400 -3.11959800

#### INT5-1f

Ni 0.82145900 -0.61732400 -0.22044300  
 O -0.21786300 0.76662700 -0.56293100  
 O -1.76138500 2.32719600 -0.73493600  
 C -1.46889800 1.15478600 -0.48069900  
 C -2.57347400 0.23003200 -0.06033500  
 C -2.63124700 -1.09286000 -0.37382600  
 C -3.90990700 -1.92777800 -0.27815700  
 H -4.81804300 -1.32563400 -0.30916500  
 H -3.92466700 -2.49857900 0.66292000  
 C -3.80256000 -2.89399600 -1.46943600  
 C -2.30880000 -3.25021800 -1.50349800  
 H -4.08482800 -2.37026300 -2.39113000  
 H -4.45294000 -3.76954800 -1.37058400  
 H -2.11019000 -4.11475100 -0.85442100  
 H -1.94986600 -3.51165700 -2.50483700  
 C -1.60175700 -2.00147000 -0.94732900  
 C -0.26127300 -1.93857500 -0.89983100  
 Si -3.95813000 1.23093500 0.81215000  
 C -5.02150900 0.13714300 1.96094500  
 H -4.40727200 -0.53840200 2.56918900  
 H -5.56260400 0.79350400 2.65505300  
 H -5.77013300 -0.46946400 1.44138700  
 C -3.16849000 2.50068700 1.97864600  
 H -2.49977200 2.01310100 2.69998700

H -2.59052500 3.24542200 1.42739800  
 H -3.94911100 3.01449700 2.55454300  
 C -5.09822200 2.07942100 -0.44048900  
 H -5.61211600 1.35245300 -1.08163300  
 H -5.86699100 2.67612000 0.06728600  
 H -4.51006400 2.74221600 -1.08212000  
 C 2.15428400 -2.88014900 0.94628400  
 C 3.21136700 -3.61102100 1.47425600  
 C 4.50375900 -3.10746300 1.33206700  
 C 4.68518700 -1.89826500 0.66467600  
 C 3.58340700 -1.20829000 0.15212600  
 N 2.32922200 -1.70872900 0.30297100  
 H 5.35715900 -3.64822700 1.73099800  
 H 1.12762200 -3.22109700 1.02080700  
 H 3.01813600 -4.54888800 1.98382100  
 H 5.67818000 -1.48171300 0.52970700  
 C 3.72866100 0.10237600 -0.58596300  
 C 3.12322400 1.31508600 0.15475200  
 P 3.18062900 2.88886300 -0.89257900  
 C 4.66311600 3.72140500 -0.11454700  
 H 5.57457300 3.16112400 -0.35237300  
 H 4.77624300 4.72509500 -0.53882200  
 H 4.57668700 3.81117600 0.97570700  
 C 1.80263800 3.83894600 -0.07749200  
 H 1.90056900 3.87571400 1.01496500  
 H 1.80484600 4.86533800 -0.46099200  
 H 0.84181000 3.38189100 -0.33952000  
 H 4.79222000 0.28297700 -0.77863200  
 H 3.24298900 0.00880800 -1.56626800  
 H 3.61611800 1.46070900 1.12531900  
 H 2.05691900 1.15457300 0.36965100  
 H 0.32097000 -2.75573400 -1.33803700

#### INT7-1f

Ni -0.98291000 0.46023200 -0.60582300  
 O 0.17372700 -0.71927200 -1.43374400  
 O 1.97474100 -1.94296700 -1.84826200  
 C 1.41819100 -1.04129300 -1.20984200  
 C 2.24818600 -0.35283700 -0.15366800  
 C 2.31306400 1.00102200 -0.07554500  
 C 3.42557600 1.80608000 0.58848900  
 H 4.31878400 1.22175600 0.81687300  
 H 3.07040200 2.25261400 1.53044900  
 C 3.69837800 2.91795300 -0.44702400

C 2.30478000 3.25911500 -1.01876800  
 H 4.33839400 2.51544900 -1.24132700  
 H 4.21088900 3.78585200 -0.01782300  
 H 1.86721600 4.11588800 -0.48753300  
 H 2.34609400 3.53356500 -2.07951900  
 C 1.46489600 1.99369800 -0.78279500  
 C 0.15071200 1.90277600 -1.05008200  
 Si 3.38416000 -1.57364800 0.76521700  
 C 3.71729500 -0.98051800 2.54790500  
 H 2.77846000 -0.75241900 3.06863000  
 H 4.21509500 -1.78143600 3.11043000  
 H 4.35520900 -0.09298600 2.61184700  
 C 2.50583500 -3.24367700 0.94779900  
 H 1.55579500 -3.13621900 1.48751300  
 H 2.29178400 -3.67724400 -0.03217300  
 H 3.12937900 -3.94493700 1.51733700  
 C 5.03548200 -1.80271900 -0.13714300  
 H 5.60555600 -0.86716900 -0.19098000  
 H 5.66514400 -2.54897900 0.36426600  
 H 4.84340700 -2.14131300 -1.16037400  
 P -2.30778400 1.92345500 0.37873200  
 C -1.47779200 2.89271300 1.71248600  
 H -0.59958700 3.38650900 1.28927100  
 H -2.15019200 3.63679500 2.15412200  
 H -1.12967800 2.21228400 2.49616800  
 C -3.12460400 3.22486400 -0.64452900  
 H -3.75942300 3.87646900 -0.03420400  
 H -2.36032900 3.83426300 -1.13535400  
 H -3.73430000 2.75253200 -1.42096000  
 C -3.71677600 1.11195000 1.27682500  
 C -3.28990800 -0.27318000 1.80925600  
 C -3.19129300 -1.32277200 0.72367700  
 C -4.03484500 -2.43709900 0.75903900  
 C -3.95451900 -3.40302900 -0.24156600  
 C -3.01711600 -3.23059500 -1.25504100  
 C -2.20199300 -2.10243200 -1.22831600  
 N -2.28599500 -1.15712300 -0.26882900  
 H -4.60613300 -4.27221700 -0.22224800  
 H -4.74417300 -2.54084700 1.57435800  
 H -2.90073100 -3.95528100 -2.05407500  
 H -1.41787600 -1.94047200 -1.95964600  
 H -4.56331800 1.00208200 0.58843300  
 H -4.04863900 1.75249800 2.10279900  
 H -4.01629900 -0.61312400 2.55498200

H -2.32512000 -0.19376300 2.32845300  
 H -0.30285700 2.75024600 -1.57976400

# **TS6-1f**

Ni -0.96761600 0.59868800 -0.65990200  
 O 0.32476400 -0.16431600 -1.81616600  
 O 1.14955800 -2.18893800 -1.41366700  
 C 1.18969900 -0.98795800 -1.12308900  
 C 2.13808800 -0.42691600 -0.15987700  
 C 2.39405200 0.94311700 -0.15247800  
 C 3.62702200 1.63670600 0.41533400  
 H 4.50361100 0.98836900 0.47560300  
 H 3.42432100 2.00119000 1.43390300  
 C 3.84302100 2.82344000 -0.55183200  
 C 2.42549700 3.20873200 -1.03446400  
 H 4.43550600 2.48002500 -1.40857500  
 H 4.38349500 3.65780900 -0.09061300  
 H 2.01331400 4.01558100 -0.40732500  
 H 2.42167200 3.58765800 -2.06573700  
 C 1.64384000 1.91317700 -0.87190600  
 C 0.40173000 1.63005900 -1.40412000  
 Si 3.04850600 -1.77301800 0.81303200  
 C 4.05388200 -1.06529500 2.27257900  
 H 4.33239500 -1.89291500 2.93852300  
 H 4.98282100 -0.57042000 1.96936000  
 H 3.47439400 -0.35038600 2.86968800  
 C 4.23312500 -2.76808300 -0.28437400  
 H 3.68362800 -3.19068800 -1.13118600  
 H 5.03873100 -2.13764700 -0.68112500  
 H 4.69832000 -3.59089900 0.27389700  
 C 1.77608000 -2.93839300 1.60932100  
 H 1.11531800 -3.35997500 0.84709800  
 H 2.27647800 -3.76327300 2.13342200  
 H 1.15951100 -2.40625400 2.34582100  
 P -2.06000100 2.03286900 0.55293400  
 C -1.13936000 2.67716000 2.02070900  
 H -0.19988000 3.11973700 1.67604700  
 H -1.71641500 3.42624700 2.57496200  
 H -0.88631900 1.84949500 2.69053700  
 C -2.71437700 3.57948400 -0.21882100  
 H -3.27349700 4.18975300 0.49944000  
 H -1.87709100 4.16747600 -0.60810100  
 H -3.36823800 3.32480500 -1.05878200  
 C -3.56884000 1.24429500 1.29694500



C -3.28010200 -0.20951900 1.73250100  
 C -3.16193500 -1.21665400 0.60447200  
 C -4.00409200 -2.33220100 0.58504700  
 C -3.86305300 -3.29432900 -0.41355600  
 C -2.86929600 -3.11929200 -1.37135100  
 C -2.07113100 -1.98039700 -1.30339100  
 N -2.21605100 -1.03891800 -0.34805000  
 H -4.51087500 -4.16640900 -0.43238600  
 H -4.75739800 -2.44454000 1.35892900  
 H -2.69903400 -3.84683600 -2.15789400  
 H -1.26276000 -1.81239600 -2.00712200  
 H -4.36823300 1.25771400 0.54582800  
 H -3.92067500 1.82829200 2.15681300  
 H -4.08174500 -0.54328300 2.40031800  
 H -2.35725000 -0.23911700 2.32863800  
 H 0.04476800 2.18249900 -2.28006800

#### 4

C -3.78492300 -0.80614200 0.00631900  
 H -3.97722300 -0.30959900 0.96625800  
 H -4.00276700 -0.06659700 -0.77503600  
 C -4.70471300 -2.02129000 -0.15022800  
 H -4.48705900 -2.76101100 0.63099200  
 H -4.51237500 -2.51750000 -1.11030300  
 C -6.19934000 -1.63940800 -0.07561600  
 H -6.42366100 -0.89438500 -0.85266900  
 H -6.40132300 -1.14460400 0.88533600  
 C -7.09251900 -2.78733600 -0.22981000  
 C -7.81776500 -3.75781400 -0.36151300  
 Si -8.91851500 -5.21598500 -0.56148800  
 C -10.71733300 -4.65630200 -0.39014500  
 H -10.97700400 -3.91126400 -1.15095800  
 H -11.40304100 -5.50524500 -0.50492400  
 H -10.90235400 -4.20757700 0.59259400  
 C -8.63577200 -5.97009400 -2.27331200  
 H -8.85879900 -5.24886500 -3.06795600  
 H -7.59608000 -6.29360000 -2.39897800  
 H -9.27928200 -6.84573000 -2.42572100  
 C -8.50783600 -6.48660800 0.77868400  
 H -7.46652300 -6.82096500 0.70570200  
 H -8.65438800 -6.06914500 1.78149200  
 H -9.15057900 -7.37122500 0.68714400  
 C -2.29127700 -1.18894600 -0.06865200  
 H -2.09035300 -1.68630900 -1.02811200

H -2.06606200 -1.93102800 0.71044600  
 C -1.39704100 -0.03998700 0.08058600  
 C -0.67553000 0.92043600 0.20585100  
 H -0.03422400 1.76482600 0.31586100

#### INT1-4a

Ni -3.06702800 -0.26333900 -0.02151700  
 C -1.90002300 -1.74664700 -0.04317500  
 C -1.19581300 -0.67388200 -0.05360100  
 H -1.88032600 -2.82755700 -0.04412700  
 C 0.17750600 -0.09504700 -0.08030600  
 H 0.31357300 0.47685100 -1.01096700  
 H 0.28806400 0.63982100 0.73119800  
 P -3.17716000 1.94509300 0.00936800  
 P -5.09653200 -1.14353200 -0.00229700  
 C -2.36397800 2.74023000 1.47810100  
 H -1.32930300 2.39244800 1.55134500  
 H -2.37256000 3.83507200 1.41195600  
 H -2.88346400 2.43475000 2.39218700  
 C -2.30597400 2.80487600 -1.38781700  
 H -2.33056700 3.89609800 -1.27967300  
 H -1.26492100 2.47098900 -1.42575200  
 H -2.77910600 2.53021800 -2.33626600  
 C -4.79121600 2.87467900 -0.00390200  
 H -5.39794600 2.57585200 0.85763800  
 H -4.63998300 3.96025200 0.03309500  
 H -5.35129100 2.63034300 -0.91291200  
 C -6.19613200 -0.78922900 1.45524000  
 H -6.37814700 0.28778300 1.52924300  
 H -7.16005400 -1.30706400 1.38002900  
 H -5.69251800 -1.10831700 2.37361600  
 C -6.24148800 -0.73078900 -1.40847300  
 H -7.20019700 -1.25741300 -1.32819100  
 H -6.43068000 0.34728500 -1.42794200  
 H -5.76398600 -1.00500000 -2.35481600  
 C -5.18524400 -2.99575700 -0.03835500  
 H -4.65047000 -3.39880900 0.82750100  
 H -6.21890500 -3.36217200 -0.02549800  
 H -4.68522900 -3.36283600 -0.94024900  
 C 1.29492500 -1.14764100 0.03428000  
 H 1.17870900 -1.87568700 -0.78003500  
 H 1.15826800 -1.70669500 0.97004300  
 C 2.70108900 -0.53953800 -0.00831700  
 H 2.81945700 0.19377500 0.80030500

H 2.84606000 0.00899000 -0.94829800  
 C 3.80912600 -1.60833200 0.12203700  
 H 3.69565200 -2.34915300 -0.68269300  
 H 3.67105100 -2.16073700 1.06272200  
 C 5.16059300 -1.05037600 0.08039100  
 C 6.27829300 -0.56538700 0.04301200  
 Si 7.96469000 0.15752800 -0.01266800  
 C 9.23750800 -1.24248600 -0.02260700  
 H 9.10390700 -1.89441600 -0.89354000  
 H 10.25900300 -0.84309700 -0.05640100  
 H 9.15073800 -1.86463500 0.87560000  
 C 8.14045100 1.19877000 -1.58310600  
 H 7.98617600 0.59186700 -2.48270400  
 H 7.40865200 2.01459100 -1.60222100  
 H 9.14108100 1.64463500 -1.64715100  
 C 8.22040100 1.24990000 1.51143200  
 H 7.48831400 2.06508300 1.54248400  
 H 8.11560700 0.67271600 2.43733400  
 H 9.22171700 1.69878300 1.50788600

#### INT2-4a

Ni 0.76584300 -0.23343800 -0.38773500  
 C 2.63168500 0.09756400 -0.31220000  
 C 2.02388300 1.13059500 0.11095000  
 O 0.23214700 -2.21371900 1.62272600  
 O 0.51046200 -2.36011100 -0.69882800  
 C 0.42110300 -1.99960600 0.46364300  
 C 1.98334500 2.50981000 0.66036200  
 H 1.36911600 3.14708000 0.00851600  
 H 1.47146400 2.49445800 1.63305800  
 H 3.54657400 -0.42314300 -0.54567800  
 P -1.40225600 0.41420200 -0.19860000  
 C -1.89050500 0.99825200 1.48702200  
 H -2.95122900 1.27001100 1.53545900  
 H -1.68612700 0.20137900 2.20879000  
 H -1.28572100 1.86745100 1.76360900  
 C -1.92080200 1.82352500 -1.28204400  
 H -2.96751900 2.10178200 -1.11369700  
 H -1.28501900 2.69214900 -1.08406900  
 H -1.79123000 1.54385500 -2.33242000  
 C -2.70363200 -0.85307000 -0.55888500  
 H -3.71297600 -0.43558400 -0.46991100  
 H -2.56464500 -1.24586100 -1.57083900  
 H -2.60227300 -1.68705100 0.14268600

C 3.38195300 3.13508500 0.82473300  
 C 3.32821600 4.55801900 1.39136300  
 H 3.88594700 3.13962900 -0.15088200  
 H 3.98187200 2.49188100 1.48192700  
 H 2.73206400 5.20324600 0.73292400  
 H 2.82346500 4.55665700 2.36619300  
 C 4.73410100 5.17630300 1.55729700  
 H 5.24861500 5.17431600 0.58555900  
 H 5.33590200 4.53753000 2.21968800  
 C 4.70472600 6.53851800 2.08891700  
 C 4.65876800 7.67321200 2.53125500  
 Si 4.60507300 9.38671300 3.19264800  
 C 3.09813200 10.27625500 2.47285600  
 H 3.14651600 10.31906900 1.37865900  
 H 2.16665300 9.76706900 2.74596600  
 H 3.03776000 11.30650700 2.84571500  
 C 6.18915000 10.28997100 2.68937700  
 H 6.19095500 11.31773900 3.07374300  
 H 7.07787800 9.78393200 3.08362400  
 H 6.29029300 10.34015100 1.59915800  
 C 4.47358400 9.31942500 5.07876300  
 H 3.56374300 8.79773200 5.39726600  
 H 5.32969600 8.79552700 5.51918000  
 H 4.44581700 10.33077700 5.50358100

#### TS1-4a

Ni -3.82048100 0.27059200 0.00706600  
 C -2.54091600 1.97825400 0.01421700  
 C -2.06206000 0.73882700 0.02059700  
 H -1.92056700 2.87073600 0.01683500  
 C -0.69714600 0.13670600 0.03360900  
 H -0.58936500 -0.48783700 0.93336000  
 H -0.59950100 -0.55150000 -0.81948900  
 O -4.11060500 3.80855000 0.00379700  
 O -5.12703000 1.77846200 -0.00478800  
 C -4.14711500 2.59377200 0.00275600  
 P -3.90118100 -1.85827400 -0.00425300  
 C -3.14125000 -2.69728900 -1.46215300  
 H -2.07593100 -2.45408300 -1.51472100  
 H -3.25775800 -3.78512000 -1.39966800  
 H -3.61737000 -2.33711800 -2.37896700  
 C -3.12761300 -2.72128700 1.43216500  
 H -3.59499000 -2.37673100 2.35943400  
 H -3.24451800 -3.80794900 1.35256400

H -2.06192900 -2.47853700 1.47835400  
 C -5.63434300 -2.49647800 -0.00182400  
 H -6.16416300 -2.11510000 -0.87999900  
 H -5.65783400 -3.59225800 -0.01300800  
 H -6.15504600 -2.13339800 0.88945300  
 C 0.44805400 1.16582900 -0.01128400  
 C 1.83224800 0.50810700 0.00594700  
 H 0.34909600 1.84705900 0.84414300  
 H 0.33825400 1.78046400 -0.91452300  
 H 1.94972800 -0.09908100 0.91286500  
 H 1.93393900 -0.17846900 -0.84459100  
 C 2.97413700 1.54668800 -0.05143500  
 H 2.87758800 2.24096900 0.79572800  
 H 2.86345200 2.15881800 -0.95806500  
 C 4.30472700 0.93989400 -0.03357700  
 C 5.40573200 0.41770500 -0.01769200  
 Si 7.07768500 -0.34585900 0.00508400  
 C 7.24831600 -1.40899600 1.56072700  
 H 6.49970600 -2.20944100 1.58011800  
 H 8.23974000 -1.87693600 1.60651500  
 H 7.11934700 -0.80948500 2.46918000  
 C 8.37688800 1.02860500 0.01352800  
 H 9.39068100 0.60911600 0.02792400  
 H 8.28974100 1.66309900 -0.87589900  
 H 8.26844400 1.67231500 0.89395300  
 C 7.28338300 -1.42336500 -1.53640600  
 H 6.53433300 -2.22307800 -1.56597500  
 H 7.17638700 -0.83199200 -2.45301500  
 H 8.27496900 -1.89282800 -1.55487300

#### INT3-4a

Ni 3.91047100 -0.06467500 -0.00204400  
 O 4.81517300 -1.61674100 -0.00258700  
 O 4.55091600 -3.85518100 0.00144500  
 C 4.08053400 -2.73241600 0.00021000  
 C 2.62577400 -2.40827800 0.00113000  
 C 2.32591800 -1.10040100 -0.00037900  
 H 1.89436500 -3.21523500 0.00258300  
 C 0.95861100 -0.47712800 -0.00112400  
 H 0.86178200 0.18216300 0.87508300  
 H 0.86146400 0.17870500 -0.87988500  
 P 3.32584000 2.12092800 0.00052600  
 C 2.41386000 2.80838100 1.45233600  
 H 2.32389600 3.89813300 1.38358000

H 1.41232000 2.37218600 1.50468300  
 H 2.94534200 2.54923600 2.37305000  
 C 4.88738500 3.11851200 -0.00246700  
 H 5.48034100 2.87801100 -0.89074000  
 H 4.67275100 4.19292000 -0.00052400  
 H 5.48517700 2.87579000 0.88195400  
 C 2.40620200 2.81161300 -1.44490100  
 H 1.40420300 2.37595300 -1.49254700  
 H 2.31709600 3.90126400 -1.37347400  
 H 2.93249500 2.55409800 -2.36904800  
 C -0.21517100 -1.47468400 0.00109000  
 C -1.57728300 -0.77098300 0.00017800  
 H -0.13462700 -2.12480100 0.88204000  
 H -0.13515100 -2.12805900 -0.87749000  
 H -1.66500200 -0.11838700 0.87870700  
 H -1.66549300 -0.12163200 -0.88070200  
 C -2.75608000 -1.76951400 0.00235600  
 H -2.67602800 -2.42488400 0.88147000  
 H -2.67652600 -2.42812300 -0.87438000  
 C -4.06271700 -1.11234100 0.00151900  
 C -5.14070400 -0.54371800 0.00074000  
 Si -6.77545600 0.29569400 -0.00044900  
 C -8.13976100 -1.01404200 -0.00321000  
 H -9.13167600 -0.54487100 -0.00401100  
 H -8.07280300 -1.65656900 -0.88863200  
 H -8.07494300 -1.65806700 0.88128200  
 C -6.91642900 1.37245900 1.54902800  
 H -6.82849400 0.77085100 2.46100300  
 H -6.13118000 2.13678000 1.57669100  
 H -7.88513100 1.88697000 1.57975200  
 C -6.91276900 1.37517000 -1.54837000  
 H -6.12751200 2.13959500 -1.57279200  
 H -6.82258900 0.77517300 -2.46118700  
 H -7.88143200 1.88966700 -1.58052600

#### INT4-4a

Ni 0.51632600 0.30481100 -0.02085100  
 O 2.14809300 0.55960300 0.80572000  
 O 3.27635000 1.98053100 2.12992300  
 C 2.27272200 1.70112200 1.49562000  
 C 1.06448700 2.55626100 1.37102100  
 C 0.06135800 2.06976400 0.62329000  
 H 1.05549500 3.52973600 1.86476600  
 C -1.18007700 2.87339600 0.32420800

H -1.22065200 3.71339800 1.03410700  
 H -2.09123400 2.28190400 0.49018300  
 P 1.69117700 -1.67140300 -0.72986300  
 C -0.97065700 1.26176700 -2.48535800  
 H -1.37979400 0.75581000 -3.37089000  
 C -1.05476900 0.33551600 -1.34039600  
 C -1.49013000 -0.40744300 -0.44995800  
 C 1.01905000 -2.95380600 -1.88725000  
 H 0.11983700 -3.41236500 -1.46527700  
 H 0.74058100 -2.48027800 -2.83467300  
 H 1.75459300 -3.74024700 -2.09140000  
 C 2.30733900 -2.66322200 0.70069500  
 H 2.78745000 -1.96800700 1.39467700  
 H 1.46952700 -3.14586800 1.21523200  
 H 3.02360600 -3.43226400 0.38942500  
 C 3.25381700 -1.15516300 -1.56651400  
 H 3.02282800 -0.68702500 -2.52927500  
 H 3.73705700 -0.41398400 -0.92522800  
 H 3.92607900 -2.00397300 -1.73528500  
 Si -2.40010000 -1.38824300 0.84377900  
 C -2.31176000 -3.22715000 0.41317900  
 H -1.28739000 -3.61104400 0.47770200  
 H -2.92395100 -3.80885000 1.11366100  
 H -2.68543100 -3.42409500 -0.59818600  
 C -1.61796200 -1.05845300 2.52605600  
 H -0.57371000 -1.38909600 2.55421800  
 H -1.62657300 0.01003500 2.76675300  
 H -2.16361000 -1.59113000 3.31514200  
 C -4.19606600 -0.79775100 0.79551200  
 H -4.64506100 -0.95551100 -0.19181400  
 H -4.80088000 -1.34417100 1.52992000  
 H -4.26792900 0.26996400 1.03152900  
 C -1.22352100 3.46970800 -1.10876200  
 H -0.21702500 3.82002800 -1.37346500  
 H -1.86286000 4.36223800 -1.08729400  
 C -1.76635200 2.56153200 -2.22260400  
 H -2.80668700 2.28921700 -2.00120400  
 H -1.78373200 3.12975500 -3.16195400  
 H 0.07564600 1.50002100 -2.71009200

#### TS2-4a

Ni 0.68718900 0.06330600 -0.03859100  
 O 2.40765800 0.51515800 -0.71300900  
 O 3.72870200 2.32655200 -0.95967500

C 2.71635300 1.78542600 -0.53836400  
 C 1.70241800 2.50512400 0.29377000  
 C 0.49774600 1.97534000 0.57568400  
 H 2.01339300 3.44355200 0.75800300  
 P 1.62480900 -1.98981000 0.24400000  
 C -1.53165800 2.29584900 -1.19283100  
 H -2.25208800 1.94838900 -1.94478200  
 H -0.74478600 2.84547300 -1.72047000  
 C -0.96051300 1.08304700 -0.52663200  
 C -1.24332100 -0.11598400 -0.13325100  
 Si -2.65058600 -1.33189500 -0.12675200  
 C -4.26627200 -0.43529000 -0.55527000  
 H -4.22413000 0.01586100 -1.55373700  
 H -5.11271400 -1.13377600 -0.54508900  
 H -4.48766500 0.36261400 0.16335800  
 C -2.33835300 -2.66179800 -1.43946100  
 H -1.38823600 -3.18569000 -1.28989700  
 H -3.13825500 -3.41287900 -1.43185900  
 H -2.31155900 -2.21451300 -2.44018500  
 C -2.81876900 -2.09989800 1.59453900  
 H -3.64324200 -2.82332300 1.62121000  
 H -1.90581800 -2.61996700 1.90244800  
 H -3.02971900 -1.32940600 2.34572500  
 C 0.82550200 -3.48094000 0.99190600  
 H 0.50435900 -3.25277500 2.01314400  
 H -0.05349500 -3.78199500 0.41632300  
 H 1.52954200 -4.32033900 1.02475600  
 C 2.29703300 -2.60786700 -1.35729400  
 H 2.84570500 -1.78198400 -1.81791000  
 H 2.96345200 -3.46564500 -1.21185500  
 H 1.47650000 -2.89780200 -2.02131200  
 C 3.13482300 -1.79947400 1.28680100  
 H 2.85000100 -1.53022800 2.30895800  
 H 3.72196900 -2.72463500 1.31021800  
 H 3.73065000 -0.98752700 0.86372200  
 C -2.24284500 3.21578300 -0.17743300  
 H -2.70798000 4.05175700 -0.71519300  
 C -0.43718900 2.64932600 1.56199000  
 H 0.17177500 3.10587300 2.35371900  
 C -1.29628600 3.75075800 0.90196100  
 H -1.87686600 4.27208400 1.67413600  
 H -0.61761000 4.49335700 0.46159300  
 H -1.08441300 1.90760800 2.04391500  
 H -3.05689400 2.64693700 0.29092800

**INT5-4a**

C 3.77247700 -0.64758900 -1.95255700  
C 3.07017500 0.66717800 -2.30566200  
C 2.39133900 1.27994100 -1.06869700  
C 1.43268600 0.30875000 -0.37005500  
C 0.21075000 0.67631400 0.05641200  
Si -0.52107200 2.40592000 0.28826900  
C -1.07852800 3.14287300 -1.37720800  
H -1.82791500 2.51317100 -1.87317400  
H -1.52945600 4.13236300 -1.22811500  
H -0.24123100 3.26481600 -2.07435500  
C -2.02180700 2.31593400 1.44311100  
H -2.39436400 3.32774300 1.65045400  
H -2.85293700 1.73876000 1.02308500  
H -1.74614800 1.85911200 2.40059500  
C 0.73671900 3.56341800 1.10965700  
H 1.08547600 3.13239400 2.05532000  
H 1.61594700 3.75120800 0.48474000  
H 0.27370800 4.53285400 1.33453200  
C 2.77256800 -1.64119900 -1.33767700  
C 2.01791200 -1.05119300 -0.15726200  
C 1.98374100 -1.70490500 1.02273100  
H 2.54001200 -2.63663300 1.11169700  
Ni -0.83231400 -0.65268800 0.88898300  
C 1.40092600 -1.26433200 2.34106800  
O 2.00940200 -1.54052200 3.36558400  
O 0.23861600 -0.63283300 2.34260900  
H 1.86948200 2.19948200 -1.34888000  
H 3.17501000 1.56532200 -0.34949400  
H 3.78529800 1.38621500 -2.72525300  
H 2.31462500 0.48118200 -3.08297700  
H 4.23841000 -1.08901000 -2.84262600  
H 4.57947600 -0.45199200 -1.23294100  
H 2.04475100 -1.91626500 -2.11899600  
H 3.27822000 -2.56546800 -1.03662900  
P -2.23662700 -1.17651300 -0.77001900  
C -3.77594200 -0.19523500 -1.07482600  
H -3.51953200 0.84011800 -1.31695700  
H -4.35706800 -0.62014100 -1.90095600  
H -4.39369200 -0.18967500 -0.17134400  
C -1.46304800 -1.24947100 -2.44292500  
H -1.07556300 -0.26147400 -2.70565300  
H -0.61899700 -1.94511200 -2.42091600

H -2.18187700 -1.57631800 -3.20233000  
C -2.91091100 -2.88818900 -0.55049200  
H -3.49357900 -2.93990500 0.37507100  
H -3.55293100 -3.17830600 -1.38983300  
H -2.08441000 -3.60127800 -0.47028400

**TS3-4a**

Ni 1.06934900 -0.01988400 0.79296700  
O -0.32165500 0.61797400 1.85907800  
O -0.95329200 -0.34973400 3.78712300  
C -0.88405500 -0.42088500 2.57273000  
C -1.39689000 -1.53880000 1.78041500  
C -1.73503500 -1.48500200 0.45402300  
H -1.66084700 -2.41341800 2.36863900  
C -2.41654600 -2.68719700 -0.18209200  
P 2.58933400 -0.91633200 -0.48652100  
C -1.50017700 -0.30009300 -0.34712700  
C -0.56741800 0.63544000 0.03905600  
Si -0.43117600 2.48959800 -0.38336000  
C 0.08751900 2.71873000 -2.19809500  
H 0.22273700 3.78796400 -2.40692300  
H 1.04197700 2.22229400 -2.40831200  
H -0.65265400 2.33913200 -2.91085500  
C -2.09863300 3.33859700 -0.08436100  
H -2.02550400 4.41569700 -0.28152400  
H -2.89183500 2.93623400 -0.72430200  
H -2.41116700 3.20959700 0.95822000  
C 0.87663800 3.29624200 0.71543400  
H 0.92992200 4.37376400 0.51219900  
H 0.63472000 3.15573500 1.77343000  
H 1.87223900 2.87079900 0.54226800  
C 3.48589900 0.15072700 -1.70715200  
H 2.76917800 0.58465200 -2.41091200  
H 3.98721400 0.97123200 -1.18453900  
H 4.23143100 -0.42391400 -2.26876100  
C 1.97785300 -2.29024900 -1.56540700  
H 2.77851700 -2.70462300 -2.18876300  
H 1.56183800 -3.08529300 -0.93902900  
H 1.17647800 -1.91442400 -2.20871300  
C 3.99592900 -1.72315800 0.41213200  
H 3.60494300 -2.47819300 1.10116900  
H 4.69826600 -2.20021300 -0.28146200  
H 4.53211400 -0.97351300 1.00262200  
C -2.40956400 -0.04194000 -1.54976000

H -3.30875800 0.49620300 -1.20776400  
H -1.91619600 0.61551900 -2.27170000  
C -2.86357300 -1.32912400 -2.25164900  
H -2.00639900 -1.80057000 -2.75461700  
C -3.46234700 -2.31020400 -1.24051100  
H -3.82436700 -3.21602000 -1.74224300  
H -4.33240200 -1.84694900 -0.75407900  
H -1.64039000 -3.29823200 -0.67033100  
H -3.59327500 -1.08217400 -3.03283400  
H -2.86111900 -3.31834500 0.59550000

#### TS4-4a

Ni 2.72162400 -0.00547700 0.01604300  
C 1.59369200 -1.61169900 -0.52322100  
C 0.95811400 -0.46559500 -0.37554100  
H 1.28596400 -2.62270900 -0.27468800  
O 3.53480000 -2.89314600 -1.45428300  
O 3.21278400 -0.80247500 -2.33895200  
C 3.04195000 -1.78889500 -1.62405500  
P 2.75678900 2.17725700 -0.23515700  
P 4.64665900 -0.70592800 1.03192300  
C -0.43537700 0.05083800 -0.31511600  
H -0.61501200 0.63112500 -1.23504800  
H -0.53444700 0.77066900 0.50954500  
C -1.51540200 -1.04037200 -0.19173000  
H -1.42076300 -1.73011600 -1.04048900  
H -1.32314400 -1.63188800 0.71374400  
C -2.93371300 -0.46170000 -0.13900900  
H -3.13638900 0.12110300 -1.04694800  
C -5.37096300 -1.01837900 0.07270400  
C -6.49271700 -0.54538800 0.13039000  
Si -8.18637400 0.16106400 0.22068900  
C -8.35185100 1.15878700 1.82014900  
H -9.35481400 1.59547500 1.90652700  
H -8.18408200 0.52921700 2.70157500  
H -7.62587400 1.97936400 1.85351000  
C -9.44511000 -1.25067000 0.20699400  
H -10.46963000 -0.86158300 0.26157500  
H -9.36232000 -1.84857000 -0.70786400  
H -9.29668300 -1.92346100 1.05941300  
C -8.46334600 1.29094300 -1.27146700  
H -8.36343300 0.73939900 -2.21334300  
H -9.46784100 1.73186700 -1.24645900  
H -7.73792600 2.11249900 -1.28766000

C 4.38971800 3.05381800 -0.21169100  
H 5.05971000 2.58924300 -0.94202700  
H 4.27582400 4.11526600 -0.46092300  
H 4.84933300 2.97328300 0.77825500  
C 1.76151200 3.22050600 0.92781300  
H 0.72128100 2.88129500 0.92523300  
H 2.14921700 3.11032600 1.94572500  
H 1.79213500 4.28005100 0.64800000  
C 2.10784000 2.67498700 -1.89251600  
H 2.24727900 3.74597700 -2.08002100  
H 2.62415600 2.09047200 -2.65938400  
H 1.04235000 2.43541000 -1.95389700  
C 6.12652200 -0.96308200 -0.04538300  
H 6.42675300 -0.01692900 -0.50616200  
H 6.97061600 -1.37143100 0.52261100  
H 5.84778900 -1.66136800 -0.83972000  
C 5.34540500 0.24441500 2.46314700  
H 6.19206900 -0.28601600 2.91362800  
H 5.68702100 1.23075300 2.13388000  
H 4.57191300 0.38616700 3.22497300  
C 4.40646400 -2.38487800 1.76321300  
H 3.62278000 -2.34681100 2.52673400  
H 4.08107300 -3.04935200 0.95727700  
H 5.33011800 -2.76881600 2.21222200  
C -4.01307600 -1.55755300 0.00341500  
H -3.93810900 -2.25548600 -0.84283500  
H -3.80942000 -2.15254900 0.90539500  
H -3.02411800 0.23512400 0.70460800

#### INT6-4a

Ni 2.83664000 -0.12655800 -0.06746200  
C 1.33686200 -2.34567000 -0.52406000  
C 1.12161100 -1.03321800 -0.32848900  
H 0.55895100 -3.09445100 -0.66642900  
O 3.10653700 -3.96782100 -0.65262700  
O 3.58686100 -1.82993300 -0.16170000  
C 2.74299900 -2.81608000 -0.47054200  
P 2.12187700 1.94669600 -0.56376100  
P 5.03491900 0.24385600 0.75121000  
C -0.26937100 -0.45611100 -0.18369500  
H -0.42470500 0.36249200 -0.90163200  
H -0.33884900 0.01872000 0.80832300  
C -1.44763500 -1.43593600 -0.32652700  
H -1.41116600 -1.91138300 -1.31608900

H -1.34036600 -2.24343000 0.40937900  
 C -2.80281600 -0.74418500 -0.13690900  
 H -2.92349500 0.05952000 -0.87553200  
 C -5.28963800 -1.06888200 -0.08192300  
 C -6.35621900 -0.50064600 0.07725700  
 Si -7.96563600 0.35080300 0.31581500  
 C -8.08116700 0.96579300 2.10167800  
 H -9.03354900 1.48195200 2.27685200  
 H -8.01564400 0.13446100 2.81303400  
 H -7.27236100 1.66795300 2.33477300  
 C -9.36988800 -0.86680200 -0.03647700  
 H -10.34691100 -0.38403900 0.09183800  
 H -9.31784100 -1.24981600 -1.06209700  
 H -9.32946700 -1.72631200 0.64243400  
 C -8.06908100 1.81700900 -0.87646100  
 H -7.99692900 1.48674600 -1.91911600  
 H -9.02062300 2.35089900 -0.75947100  
 H -7.25938800 2.53374500 -0.69689400  
 C 3.40609600 3.27966600 -0.65800900  
 H 4.24118500 2.95020800 -1.28351200  
 H 2.98202400 4.19329100 -1.08974000  
 H 3.79014100 3.50813200 0.33933100  
 C 0.82326500 2.82067700 0.42592100  
 H -0.09669300 2.23513600 0.45920500  
 H 1.18118900 2.95199500 1.45233300  
 H 0.60612300 3.80564000 -0.00255600  
 C 1.47817400 2.00912600 -2.29863200  
 H 1.14172900 3.01885800 -2.55993900  
 H 2.28303000 1.71452000 -2.97966500  
 H 0.65489500 1.30508700 -2.43339200  
 C 6.31617100 -0.44151400 -0.38570100  
 H 6.44636500 0.22059000 -1.24838000  
 H 7.28100200 -0.56312700 0.11955300  
 H 5.94822400 -1.40919400 -0.73397200  
 C 5.84429400 1.80124100 1.36337600  
 H 6.81047100 1.57467900 1.82858000  
 H 6.01406000 2.50090700 0.54001700  
 H 5.20895300 2.29143700 2.10887600  
 C 5.16489700 -0.83910200 2.24087800  
 H 4.53500800 -0.44439500 3.04498400  
 H 4.79724900 -1.82736800 1.95775000  
 H 6.19898000 -0.90704700 2.59741000  
 C -3.99315700 -1.72049900 -0.26691100  
 H -3.96280800 -2.20323200 -1.25429300

H -3.88131100 -2.52968000 0.46890400  
 H -2.84598100 -0.26656000 0.85088100  
**INT1-4b**  
 Ni 0.07996000 0.68913200 0.00594000  
 C 0.24951300 2.63971800 0.19443900  
 C -0.98094600 2.25759000 0.16159200  
 C -2.41285000 2.67634700 0.21798200  
 H -2.99594200 2.10470700 -0.51832900  
 H -2.82331400 2.38939200 1.19833100  
 P -1.46088000 -0.89361400 -0.19962800  
 P 2.11983700 -0.22147900 -0.01192300  
 C -2.80572400 -0.89883300 1.08360400  
 H -3.28911000 0.08064800 1.11989500  
 H -3.56328300 -1.66456700 0.87674800  
 H -2.36568800 -1.09203900 2.06759500  
 C -2.45668600 -0.77515000 -1.76508900  
 H -3.26452000 -1.51644000 -1.79566100  
 H -2.88653600 0.22658700 -1.85546200  
 H -1.79723700 -0.93263000 -2.62489600  
 C -1.07936800 -2.71672200 -0.22227600  
 H -0.58977200 -3.00598400 0.71371400  
 H -1.99110500 -3.31499000 -0.33885000  
 H -0.39964200 -2.94873900 -1.04741000  
 C 2.93995700 -0.29155100 1.65442900  
 H 2.34233700 -0.91980100 2.32343600  
 H 3.95564400 -0.70161500 1.59571100  
 H 2.98020000 0.71167300 2.08655500  
 C 2.39717000 -1.98000500 -0.56138400  
 H 3.45810700 -2.25289200 -0.51026700  
 H 1.82853500 -2.66697600 0.07171400  
 H 2.05354800 -2.10533900 -1.59380000  
 C 3.43896500 0.59413300 -1.03554400  
 H 3.54970200 1.63968900 -0.74040100  
 H 4.40615100 0.08732900 -0.93109600  
 H 3.14008900 0.57416500 -2.08897700  
 C -2.66655700 4.17720500 -0.00728900  
 H -2.22737200 4.47274200 -0.97003500  
 H -2.13776700 4.74945600 0.76427400  
 C -4.15748800 4.53331400 0.01378700  
 H -4.60117800 4.23909900 0.97411300  
 H -4.69157700 3.96701600 -0.76065200  
 C -4.40677100 6.04076100 -0.20962700  
 H -3.96400800 6.34399600 -1.16903700  
 H -3.87677700 6.61536800 0.56316900

C -5.82589100 6.39935000 -0.19452200  
 C -7.00188400 6.67509100 -0.17870400  
 H -8.03824000 6.92387100 -0.16520900  
 Si 1.44538200 4.04312100 0.29026300  
 C 0.62479800 5.64958600 0.89438300  
 H -0.14301900 6.00218400 0.19702100  
 H 0.15164400 5.51630800 1.87476500  
 H 1.37351300 6.44646400 0.99427100  
 C 2.84764800 3.67239200 1.51678500  
 H 3.47731100 2.83385000 1.20132400  
 H 3.49906400 4.54842100 1.63036800  
 H 2.44275600 3.42990800 2.50704400  
 C 2.17988400 4.38833200 -1.42669300  
 H 2.92395600 5.19415800 -1.38370200  
 H 2.66510000 3.50378200 -1.85329300  
 H 1.39345500 4.69809600 -2.12559900

#### TS1-4b

Ni 1.44864500 1.15071700 -0.15026400  
 C 1.21532500 -1.03246400 -0.03946400  
 C 0.26260400 -0.16129200 0.29083600  
 O 2.85656900 -1.73820700 -1.66472200  
 O 3.10978500 0.41444800 -1.02400400  
 C 2.56560900 -0.73166400 -1.03288800  
 P 0.56070900 3.06103800 0.21822200  
 Si 1.26052500 -2.90199900 0.41988500  
 C 0.10757000 -3.24193900 1.89610700  
 H 0.31218500 -4.25652400 2.26302400  
 H 0.28053300 -2.55609200 2.73408300  
 H -0.95685900 -3.20839300 1.63758900  
 C 0.67117900 -3.96199900 -1.02924500  
 H 1.30826700 -3.79437900 -1.90057800  
 H 0.70591800 -5.02651200 -0.76293700  
 H -0.36352000 -3.72344000 -1.30473500  
 C 3.00439600 -3.34935000 0.99517000  
 H 3.72812100 -3.23615300 0.18476700  
 H 3.31992100 -2.71284900 1.83104200  
 H 3.02809400 -4.38922800 1.34600500  
 C -1.14159800 -0.21400800 0.79952300  
 H -1.23631700 -1.01783600 1.53953700  
 H -1.38716400 0.71633700 1.32752100  
 C -0.99675300 3.48454500 -0.68167300  
 H -1.79654100 2.79794700 -0.38885200  
 H -1.31314700 4.51118800 -0.46494900

H -0.83514900 3.37941500 -1.75866500  
 C -2.16905300 -0.44326500 -0.32973000  
 H -2.04386500 0.33276300 -1.09737300  
 H -1.94389800 -1.39752000 -0.82333200  
 C 0.14343400 3.46367500 1.97349100  
 H 1.04502400 3.38184300 2.58812800  
 H -0.26248700 4.47759400 2.06520100  
 H -0.59154400 2.74951200 2.35656300  
 C 1.69400500 4.44335200 -0.25554900  
 H 2.63322900 4.35213500 0.29875300  
 H 1.92538500 4.37447100 -1.32282000  
 H 1.24529200 5.42108800 -0.04488800  
 C -3.61463200 -0.44389900 0.17996600  
 H -3.74295700 -1.21914600 0.94616900  
 H -3.84280100 0.51303600 0.66812700  
 C -4.63698900 -0.68374200 -0.95174900  
 H -4.50699500 0.08216300 -1.72970500  
 H -4.42377100 -1.64646900 -1.43720100  
 C -6.02319200 -0.67035600 -0.48268400  
 C -7.16015400 -0.65396900 -0.07567900  
 H -8.16634300 -0.64428000 0.27641600

#### TS4-4b

Ni 0.74582500 0.59823900 -0.05928400  
 C 0.45395900 -1.46252500 -0.57038700  
 C -0.52482000 -0.59400600 -0.71052500  
 O 3.00691600 -1.68463500 -0.48663200  
 O 2.18142400 -0.18434600 -2.00533800  
 C 2.18640100 -1.00318300 -1.08892400  
 P 0.10114100 2.48829700 -0.99284400  
 P 2.40962200 1.06766600 1.45664500  
 C -1.99727300 -0.57127700 -0.95994300  
 H -2.33104200 -1.53351700 -1.36868400  
 H -2.22123500 0.18255900 -1.72849500  
 C -2.81174300 -0.24044000 0.30733800  
 H -2.63125800 -1.02181200 1.05739600  
 H -2.43119300 0.69315900 0.74237900  
 C -4.31513300 -0.12148600 0.03407900  
 H -4.69299000 -1.05271800 -0.40655800  
 C -6.55711900 0.32851000 1.06946500  
 C 1.31938100 3.88568600 -0.95212300  
 H 2.28210100 3.53326900 -1.33502900  
 H 0.97921700 4.72487700 -1.56992600  
 H 1.46227400 4.23982200 0.07324000



C -1.46302400 3.36510000 -0.51966300  
 H -2.31659800 2.68971100 -0.62893300  
 H -1.41097700 3.67881400 0.52800400  
 H -1.62913000 4.24872500 -1.14698000  
 C -0.09679000 2.25782900 -2.81611200  
 H -0.20422000 3.21619100 -3.33732900  
 H 0.78024200 1.71961700 -3.18565500  
 H -0.97596600 1.63996000 -3.02050500  
 C 4.09538700 1.43734500 0.79114100  
 H 4.06764600 2.33560400 0.16661300  
 H 4.82423300 1.58286500 1.59707700  
 H 4.40295700 0.59320700 0.16724800  
 C 2.13218600 2.45483500 2.65756700  
 H 2.95005600 2.52367400 3.38400300  
 H 2.05334100 3.40952700 2.12860700  
 H 1.19445600 2.28704100 3.19764400  
 C 2.76244700 -0.33871400 2.60107400  
 H 1.86059100 -0.59431900 3.16631400  
 H 3.04734100 -1.19958900 1.99166400  
 H 3.56934100 -0.09422700 3.30201400  
 C -5.12071500 0.19084000 1.31371700  
 H -4.94966300 -0.60361900 2.05379600  
 H -4.73716400 1.11553300 1.76840100  
 H -4.50256100 0.66850300 -0.70554800  
 C -7.73900400 0.44001300 0.84701600  
 H -8.78334400 0.53658000 0.65615700  
 Si 0.42585000 -3.32164700 -0.20348800  
 C 1.22669200 -3.69525100 1.46843800  
 H 1.14478500 -4.76618000 1.69537400  
 H 2.28593900 -3.42637000 1.45077600  
 H 0.74164800 -3.14393600 2.28269600  
 C 1.30856700 -4.25727500 -1.58981700  
 H 0.82922400 -4.08018300 -2.56014700  
 H 2.35353300 -3.94266800 -1.66265300  
 H 1.28424700 -5.33801000 -1.39940900  
 C -1.37213400 -3.94113700 -0.13477300  
 H -1.96308500 -3.42994600 0.63451600  
 H -1.89072000 -3.82455500 -1.09364800  
 H -1.37875700 -5.01199400 0.10770400

#### INT8-4cd

C 0.56578800 -2.56841700 0.59469700  
 C -0.70154900 -2.65914900 0.57755900  
 C 1.48640500 -0.26095500 -0.81195000

C 1.00220300 0.76253400 -0.26239300  
 Si 1.07548000 2.50331900 0.34679200  
 H -1.56721000 -3.28003000 0.75212100  
 Ni -0.21434100 -0.87616900 0.04031800  
 C 0.43423700 3.70192300 -0.97456700  
 H 0.48673100 4.73779500 -0.61553300  
 H 1.03808300 3.63460200 -1.88719300  
 H -0.60562200 3.49618000 -1.24908200  
 C 0.07650400 2.69402800 1.94369400  
 H 0.44051000 2.00019800 2.71064400  
 H 0.16272600 3.71252000 2.34294800  
 H -0.98823300 2.48447800 1.79118700  
 C 2.88934400 2.91695100 0.71686500  
 H 2.99232900 3.94358700 1.09109100  
 H 3.30112200 2.24135100 1.47566000  
 H 3.50961500 2.82520700 -0.18247900  
 P -2.33862300 -0.11214600 -0.08098000  
 C -2.84471500 1.55873000 -0.72306300  
 H -2.43097800 1.70425000 -1.72631200  
 H -3.93566500 1.65984000 -0.77131400  
 H -2.44894500 2.34815100 -0.07759000  
 C -3.29552900 -0.16645600 1.50860300  
 H -4.35627100 0.06876100 1.35990500  
 H -3.20499800 -1.16388700 1.94964000  
 H -2.86825800 0.55085500 2.21697700  
 C -3.38660800 -1.18841100 -1.17215600  
 H -3.30660800 -2.22979600 -0.84816300  
 H -4.44003100 -0.88419100 -1.15563300  
 H -3.01647100 -1.12987000 -2.20100500  
 C 1.90590900 -3.14829900 0.86641000  
 C 2.46457900 -1.00648300 -1.63833300  
 C 2.84581100 -3.25367000 -0.35107200  
 C 3.43247000 -1.93300100 -0.86911700  
 H 4.25213400 -2.17636600 -1.55829100  
 H 3.88307500 -1.37431200 -0.03771600  
 H 2.40785700 -2.54712200 1.63855000  
 H 1.77462500 -4.15414200 1.29224400  
 H 1.93111600 -1.60119000 -2.39172900  
 H 3.06068000 -0.26531400 -2.19066900  
 H 2.32636500 -3.77300900 -1.16810900  
 H 3.68460100 -3.89955700 -0.05840900

#### TS7-4cd

C 0.56234500 -2.03521400 0.15531300

C -0.73953000 -2.06388700 -0.12477900  
 C 1.40253400 -0.69095800 -0.03620500  
 C 0.96713800 0.56191300 0.22525000  
 Si 1.67831100 2.25917400 0.08634300  
 H -1.40706300 -2.92059600 -0.10902300  
 Ni -0.83624100 -0.22201500 -0.01719600  
 C 0.70624900 3.20575600 -1.24870000  
 H 1.04119100 4.24859800 -1.31906000  
 H 0.83650300 2.74684200 -2.23678500  
 H -0.36680000 3.21008100 -1.02358300  
 C 1.41213600 3.12355200 1.75825100  
 H 1.95146900 2.60491400 2.56061000  
 H 1.76793300 4.16171000 1.73449100  
 H 0.35012800 3.13300800 2.02955300  
 C 3.53229100 2.45546800 -0.33615000  
 H 3.81987000 3.51472800 -0.29595800  
 H 4.17492600 1.91741100 0.37182700  
 H 3.76987200 2.09282200 -1.34374100  
 P -2.95332000 0.00033600 -0.03869300  
 C -3.54203100 1.72220200 0.28756500  
 H -3.13319900 2.39665600 -0.47084400  
 H -4.63677000 1.78378700 0.27429100  
 H -3.17171400 2.04912600 1.26373900  
 C -3.88170300 -0.98872700 1.21548700  
 H -4.96062000 -0.80913400 1.14775400  
 H -3.68432700 -2.05379200 1.06364500  
 H -3.53552700 -0.71938700 2.21787500  
 C -3.79798500 -0.43179100 -1.62479100  
 H -3.60084400 -1.48037800 -1.86608300  
 H -4.88044600 -0.27036300 -1.56309000  
 H -3.38959600 0.18298300 -2.43256400  
 C 1.35163500 -3.21845000 0.69353100  
 C 2.72513900 -1.03178700 -0.73870200  
 C 2.66482600 -3.46744900 -0.06218100  
 C 3.50756500 -2.19019300 -0.09988700  
 H 4.43599300 -2.36061800 -0.66121900  
 H 3.80162100 -1.91315800 0.92270700  
 H 1.59367700 -3.00298500 1.74647200  
 H 0.72003700 -4.11448100 0.68863200  
 H 2.49891200 -1.30753000 -1.78190600  
 H 3.34312900 -0.13259300 -0.77616500  
 H 2.44000400 -3.78999900 -1.08886200  
 H 3.21620500 -4.28729800 0.41636000

# **INT9-4cd**

C 1.15559600 -1.84622300 0.03016600  
 C -0.18529400 -1.70770700 0.00646100  
 C 1.87137100 -0.54111500 0.00822800  
 C 1.03534900 0.51980000 0.04325600  
 Si 1.21870600 2.36095700 -0.00266900  
 H -0.85526800 -2.57541900 0.03074100  
 Ni -0.82794900 0.07564400 0.03945800  
 C 1.76007500 3.02240800 -1.70161000  
 H 1.73932500 4.11965900 -1.73299700  
 H 2.78023900 2.70087600 -1.94395900  
 H 1.10199000 2.65031800 -2.49614000  
 C -0.56690200 2.97557200 0.32334000  
 H -0.86865200 2.79239400 1.36294600  
 H -0.68463800 4.04963200 0.13079400  
 H -1.29872500 2.47077600 -0.33322700  
 C 2.34385100 3.10594200 1.33680600  
 H 2.29733700 4.20288600 1.32929100  
 H 2.04569200 2.76354000 2.33482600  
 H 3.39162700 2.81823000 1.18822900  
 P -3.07974600 -0.42555000 -0.00753100  
 C -4.38096300 0.89555000 -0.03540000  
 H -4.24597000 1.52806100 -0.91894700  
 H -5.39061400 0.46981400 -0.05672700  
 H -4.28263800 1.52959000 0.85174500  
 C -3.62414300 -1.47123500 1.41972600  
 H -4.66055300 -1.80976600 1.30700700  
 H -2.96686400 -2.34223100 1.50189100  
 H -3.53476100 -0.89649700 2.34716400  
 C -3.55245200 -1.46300400 -1.46537700  
 H -2.88673600 -2.32933600 -1.52276500  
 H -4.59134800 -1.80697000 -1.40359200  
 H -3.42235900 -0.88120200 -2.38350400  
 C 1.91482400 -3.15459700 0.15195300  
 C 3.38247000 -0.51237000 -0.14234300  
 C 3.36589400 -3.03561700 -0.34547200  
 C 4.05763600 -1.82431300 0.29627400  
 H 5.12147400 -1.80121500 0.02753800  
 H 4.01031100 -1.92194200 1.39102200  
 H 1.94867600 -3.44997900 1.21340200  
 H 1.38306600 -3.95998000 -0.37145800  
 H 3.62282700 -0.35105900 -1.20617400  
 H 3.80622400 0.34410200 0.39740900  
 H 3.37934900 -2.92271900 -1.43959000

H 3.91397500 -3.95828600 -0.11544900

#### TS8-4c

C 1.35906400 -1.51893600 -0.50709200  
C -0.03770500 -1.50311900 -0.41319200  
C 1.98546000 -0.25358100 -0.20196500  
C 1.05930800 0.74605500 -0.05932800  
Si 1.23805100 2.59610300 0.20533900  
H -0.59582500 -2.23165200 -1.01105200  
Ni -0.74804200 0.24694100 -0.15345500  
C 2.18380100 3.44490000 -1.20424700  
H 2.19447500 4.53433600 -1.07211200  
H 3.22471500 3.10434300 -1.24956600  
H 1.72186300 3.23026500 -2.17527300  
C -0.54708800 3.26782000 0.22889700  
H -1.14946500 2.78991400 1.01550700  
H -0.56544500 4.34662000 0.42974700  
H -1.05283800 3.11036300 -0.73352400  
C 2.04604200 2.99991700 1.87469200  
H 2.02565700 4.08062800 2.06575400  
H 1.51887900 2.50352100 2.69764900  
H 3.09258100 2.67607000 1.90714200  
P -3.06180200 -0.06179000 -0.37998000  
C -4.00833200 0.33277700 1.15859600  
H -3.88529200 1.39170300 1.40983300  
H -5.07705300 0.11674000 1.04701500  
H -3.59317100 -0.26593900 1.97374700  
C -3.60541800 -1.78810000 -0.74633300  
H -4.69791600 -1.86023800 -0.78766000  
H -3.19016400 -2.11538600 -1.70470700  
H -3.22906700 -2.44733800 0.04020700  
C -3.96261400 0.91750300 -1.67124300  
H -3.56063000 0.67823000 -2.66113500  
H -5.03826700 0.70708200 -1.66439400  
H -3.81203500 1.98798900 -1.49595900  
C 2.14985500 -2.76068000 -0.80876600  
C 3.49963700 -0.13239000 -0.14139200  
C 3.65027800 -2.49755100 -1.02322600  
C 4.18688400 -1.50054400 0.01238500  
H 5.27254700 -1.38464400 -0.09240400  
H 4.00540000 -1.89414900 1.02254100  
H 1.99395100 -3.42214200 0.05874700  
H 1.70864700 -3.29477700 -1.66080100  
H 3.86373700 0.34270600 -1.06580700

H 3.79174100 0.53540500 0.67882500

H 3.81876300 -2.09433800 -2.03227700

H 4.19906500 -3.44522600 -0.96889200

C -0.50482300 -2.27847500 1.31516600

O 0.03602100 -3.34665200 1.46232400

O -1.30745700 -1.51167400 1.82177700

#### TS8-4d

C 1.02961000 -1.99032900 0.00945300  
C -0.30341500 -1.83053200 -0.14929500  
C 1.77438000 -0.71611200 -0.00067000  
C 1.03519900 0.42932500 0.13314800  
Si 1.46039500 2.16620800 -0.48714700  
H -0.95581800 -2.70705100 -0.23820900  
Ni -0.90363700 -0.06007500 0.10357100  
C 2.89172600 2.20694300 -1.74233000  
H 2.94949200 3.21138400 -2.18214700  
H 3.86646500 1.98999700 -1.29320600  
H 2.73597400 1.49877800 -2.56490000  
C -0.05990500 2.83474800 -1.41720900  
H -0.92431800 2.94792300 -0.75518200  
H 0.16497200 3.81860700 -1.84904100  
H -0.34358600 2.16956100 -2.24299200  
C 1.89504600 3.36148100 0.92247300  
H 2.16354700 4.34636000 0.51902700  
H 1.05481600 3.50222400 1.61103600  
H 2.74687600 2.99640200 1.50831300  
P -3.09757100 -0.46617200 -0.31474900  
C -3.86940400 -1.71127700 0.81114000  
H -3.81289100 -1.34948400 1.84257000  
H -4.91825100 -1.89552200 0.55264700  
H -3.31404000 -2.65224500 0.75296000  
C -3.49202600 -1.12109100 -1.99613200  
H -4.56123400 -1.33188300 -2.11062600  
H -3.18957100 -0.38951000 -2.75202900  
H -2.92244700 -2.03875500 -2.17039700  
C -4.22121100 0.99215600 -0.15321100  
H -3.93649900 1.75458300 -0.88537200  
H -5.27127100 0.72071300 -0.31009700  
H -4.10296600 1.42582300 0.84451000  
C 1.74331000 -3.31953000 0.16382700  
C 3.25945000 -0.76408500 -0.32767800  
C 3.16612100 -3.29337000 -0.41778600  
C 3.93149100 -2.07617500 0.11400600

H 4.97012300 -2.08673900 -0.23942700  
H 3.97070100 -2.12275000 1.21173200  
H 1.82098700 -3.55526200 1.23727100  
H 1.14636900 -4.12308700 -0.28587200  
H 3.38374400 -0.66798400 -1.41734100  
H 3.77119100 0.09537000 0.11685700  
H 3.12074300 -3.24403100 -1.51555500  
H 3.69200300 -4.22188800 -0.16252100  
C -0.08819300 0.88473000 1.89120400  
O 0.53629900 0.60331200 2.86152000  
O -1.05358500 1.51355400 1.43518500

#### INT5-4b

C 0.47614600 -0.24639100 1.96469000  
C -0.59495700 -1.04651600 1.88562900  
C 1.60774200 -0.26076100 0.98665800  
C 1.43380900 -0.22176100 -0.35782800  
Si 2.81986200 -0.22272500 -1.67758900  
H -1.41215200 -0.96455200 2.60802900  
Ni -0.94908500 -2.20608000 0.47914800  
C 2.06802200 -0.49999400 -3.39043400  
H 2.86219800 -0.56054100 -4.14551600  
H 1.49944500 -1.43743700 -3.43305100  
H 1.38603500 0.31081900 -3.65816600  
C 3.75929100 1.42443200 -1.66241700  
H 4.24515300 1.62343900 -0.70001200  
H 4.53625600 1.43910500 -2.43746500  
H 3.06618100 2.24895600 -1.86375700  
C 4.02644200 -1.67067200 -1.39554300  
H 4.73499800 -1.72346400 -2.23246900  
H 4.61267500 -1.59849300 -0.47390600  
H 3.48363500 -2.62417400 -1.36942600  
P -1.11241700 -3.99267800 1.79032400  
C -2.25557600 -3.85828300 3.23377500  
H -3.27631700 -3.68130200 2.88078100  
H -2.23863500 -4.76995800 3.84077600  
H -1.95774900 -3.00959500 3.85621300  
C 0.49139900 -4.47186700 2.56501000  
H 0.37417700 -5.32412100 3.24336300  
H 1.21311500 -4.73038800 1.78401800  
H 0.88438800 -3.61357700 3.11733200  
C -1.67133600 -5.55066400 0.96209100  
H -1.00114000 -5.78765600 0.12961100  
H -1.68101100 -6.39475500 1.66048400

H -2.67942200 -5.41279100 0.55817300  
C 0.61762300 0.74326200 3.11908400  
C 2.97561700 -0.27748500 1.65714200  
C 1.99258600 0.65493000 3.79934900  
C 3.11078400 0.78834700 2.76141200  
H 4.09452700 0.69848100 3.23963000  
H 3.06833000 1.78745600 2.30561600  
H 0.49330600 1.75985100 2.71501000  
H -0.18816800 0.59168500 3.84678800  
H 3.13227500 -1.26771200 2.11614200  
H 3.77214900 -0.14386000 0.92282800  
H 2.08470100 -0.31203200 4.31549500  
H 2.08142800 1.43493400 4.56648400  
C 0.06736300 -0.01889900 -0.97333100  
O -0.10969700 0.94524200 -1.71007700  
O -0.87041500 -0.92560400 -0.76561100

#### TS3-4b

Ni -1.49347500 -0.66500600 -0.85911400  
O -0.14057300 -0.53083500 -2.11316400  
O 1.84207100 -1.54267900 -2.24071100  
C 1.10248800 -0.80648500 -1.60332800  
C 1.51134800 -0.18054600 -0.31977600  
C 1.09402000 1.10174600 -0.01541000  
C 1.73068200 1.91082500 1.10839200  
P -3.11628300 -0.58515300 0.59363400  
C 0.05067000 1.76182600 -0.78243900  
C -0.87093800 1.00990200 -1.45011700  
C -4.62992200 0.32336600 0.03974700  
H -4.35757100 1.34428100 -0.24536400  
H -5.05421200 -0.17144200 -0.83940900  
H -5.38848700 0.36255000 0.82985100  
C -2.70171000 0.27176700 2.17968400  
H -3.56771800 0.32622500 2.84943600  
H -1.89226600 -0.26500100 2.68382700  
H -2.34991200 1.28480800 1.96226500  
C -3.81715000 -2.19444900 1.18549800  
H -3.02454400 -2.79434700 1.64370400  
H -4.61654100 -2.04043100 1.91929900  
H -4.21732200 -2.75672400 0.33585700  
C 0.03676800 3.27979200 -0.92842900  
H 0.71169100 3.56673600 -1.75161800  
H -0.96293500 3.62404600 -1.21844400  
C 0.50396400 3.99302000 0.34570300

H -0.24331200 3.86212600 1.14208600  
 C 1.84536400 3.41348400 0.80125800  
 H 2.21436000 3.93691500 1.69197400  
 H 2.59317700 3.57018700 0.01084800  
 H 1.11486000 1.79068900 2.01375000  
 H 0.58901200 5.07131300 0.16139100  
 H 2.71810900 1.51595300 1.35325100  
 H -1.48892400 1.41194000 -2.25299400  
 Si 2.80162800 -1.25098700 0.59826800  
 C 2.84183200 -0.89440200 2.47226700  
 H 3.31642500 -1.74598100 2.97702100  
 H 3.41070600 0.00014200 2.74601100  
 H 1.83370200 -0.79031700 2.89218300  
 C 4.53486700 -0.99188800 -0.11999800  
 H 4.87235700 0.04566600 -0.00672400  
 H 5.27023400 -1.63795100 0.37631400  
 H 4.53094000 -1.23141600 -1.18816300  
 C 2.29212300 -3.07112000 0.45549700  
 H 2.22625200 -3.38648900 -0.58859800  
 H 3.02447600 -3.70894800 0.96688300  
 H 1.31776600 -3.24618600 0.92998800

## 5

O -0.44585600 2.61537300 -0.02741300  
 O 1.75306700 2.30929600 0.05728700  
 C 0.66829400 1.76059500 0.02963400  
 C 0.41606400 0.32164300 0.03192300  
 C -0.88839100 -0.13321400 0.03928500  
 C -1.21912000 -1.61830300 -0.02064700  
 C -1.99379900 0.80826800 0.03660700  
 C -1.69487900 2.12686500 -0.01510600  
 C -3.44827300 0.37457100 0.11181100  
 H -3.78741500 0.42540300 1.15753600  
 H -4.07476900 1.08041300 -0.44716400  
 C -3.65815600 -1.05849400 -0.38615500  
 H -3.49816000 -1.11014100 -1.47233800  
 C -2.66985300 -1.98303800 0.32783400  
 H -2.84688400 -3.03159700 0.06123100  
 H -2.82512500 -1.90515300 1.41339200  
 H -1.01095000 -1.95918800 -1.04547600  
 H -4.69240100 -1.37009100 -0.19909000  
 H -0.53418200 -2.17352300 0.62247600  
 Si 2.07913500 -0.64426400 -0.01337700  
 C 3.06461100 -0.23158000 1.54850800

H 2.54222400 -0.57161900 2.45137300  
 H 4.04253500 -0.72922400 1.52687000  
 H 3.22758200 0.84617500 1.63108400  
 C 1.91006100 -2.53771800 -0.07419800  
 H 2.92259900 -2.94835600 -0.18567200  
 H 1.49205800 -2.96943500 0.84221100  
 H 1.32055800 -2.89968900 -0.92327900  
 C 3.00967700 -0.13910800 -1.58268700  
 H 2.46100200 -0.43612700 -2.48514700  
 H 3.16490200 0.94239400 -1.61467200  
 H 3.99053900 -0.63015800 -1.61776000  
 H -2.43712000 2.91933900 -0.04815700

## 6

O -0.67686800 1.53879800 -0.03795600  
 O 0.00903300 3.67268000 -0.00130800  
 C 0.33879300 2.50739400 -0.00934000  
 C 1.67246100 1.95990600 -0.00283100  
 C 1.91702600 0.61822400 -0.01762400  
 H 2.48091700 2.68431900 0.00037000  
 C 3.35187100 0.12419400 -0.08946200  
 C 0.80991300 -0.32037800 -0.01223800  
 C -0.46188300 0.18350500 -0.02498400  
 Si -2.21396300 -0.60272800 0.00878700  
 C -2.23906500 -2.49474300 -0.04391400  
 H -3.28363100 -2.82661000 0.02026500  
 H -1.82998200 -2.89808800 -0.97702900  
 H -1.70018900 -2.95331900 0.79200100  
 C -3.02319200 -0.00957700 1.61116700  
 H -4.07304700 -0.32483900 1.65578900  
 H -2.51635600 -0.41547800 2.49473600  
 H -2.99488400 1.08299800 1.67999400  
 C -3.13037600 0.07945400 -1.49614900  
 H -4.17978100 -0.24010300 -1.49027100  
 H -3.10873800 1.17412500 -1.50109600  
 H -2.68141300 -0.27011900 -2.43345400  
 C 1.07580700 -1.81843400 0.07381000  
 H 0.92415000 -2.14923500 1.11243100  
 H 0.34872900 -2.36779200 -0.52903100  
 C 2.49822100 -2.21541400 -0.34631400  
 H 2.61109500 -2.11149800 -1.43499200  
 C 3.53123300 -1.33095300 0.35595100  
 H 4.55165800 -1.66156100 0.12955900  
 H 3.40509200 -1.41159200 1.44483600

H 3.68037900 0.21078800 -1.13634300  
H 2.66271100 -3.27351700 -0.11094600  
H 3.99659000 0.79881900 0.48583700

#### INT1-4e

C -1.65251400 -1.18169400 -0.19025900  
H -1.53032300 -1.63994300 -1.18123700  
H -1.53410300 -1.99303200 0.54096400  
C -3.05334600 -0.57202300 -0.06831400  
H -3.17882600 0.23390800 -0.80332400  
H -3.17940400 -0.11204100 0.92068300  
C -4.17161700 -1.61738100 -0.27845100  
H -4.05534100 -2.42577300 0.45782800  
C -5.51811900 -1.05563400 -0.17415000  
C -6.63147700 -0.56732700 -0.08457800  
Si -8.31081900 0.16100600 0.04525900  
C -9.17516400 0.02710700 -1.63295500  
H -9.26168900 -1.01781200 -1.95254400  
H -10.18753400 0.44825800 -1.58816300  
H -8.62170200 0.56779900 -2.40936100  
C -9.29860800 -0.78443800 1.35358400  
H -9.39418000 -1.84431400 1.09096800  
H -8.81449300 -0.72706200 2.33532800  
H -10.31035700 -0.37159100 1.45425400  
C -8.15974200 1.97956000 0.54679600  
H -7.65099600 2.08482200 1.51197800  
H -7.58879700 2.55039000 -0.19458700  
H -9.14966200 2.44433500 0.63755600  
C -0.52567700 -0.15506600 0.02355500  
H -0.63986900 0.66574600 -0.70078600  
C 0.84327600 -0.73442100 -0.09291300  
C 1.55080700 -1.79048900 -0.30124800  
H 1.49233600 -2.84775600 -0.53159900  
C 4.86449000 -2.07480400 0.55102300  
C 6.14442900 -2.59608600 0.70015300  
C 7.22550800 -1.85493900 0.22555600  
C 6.96913100 -0.62498800 -0.37413900  
C 5.65551200 -0.15622200 -0.48956100  
N 4.60667100 -0.88028100 -0.02505900  
H 8.24266700 -2.22571000 0.31596000  
H 3.98987900 -2.61720300 0.89062000  
H 6.28046000 -3.56355200 1.17290700  
H 7.78277400 -0.01867200 -0.76092200  
Ni 2.67942600 -0.30649800 -0.01285900

C 5.38396200 1.18614800 -1.13287000  
H 6.32452100 1.56459200 -1.54962600  
H 4.69588400 1.04447800 -1.97702100  
C 4.79688200 2.23634500 -0.15958200  
H 4.88979600 3.23964900 -0.59383200  
H 5.37173300 2.23532500 0.77485900  
P 3.00822500 1.85163800 0.23381200  
C 2.11757100 2.97733800 -0.94455600  
H 2.31849900 2.66154400 -1.97339000  
H 1.03934100 2.88940200 -0.77777400  
H 2.41416500 4.02669200 -0.82586400  
C 2.76535900 2.76400300 1.83276400  
H 3.07817500 3.81321400 1.76874300  
H 1.70674200 2.72736600 2.10949200  
H 3.33507600 2.26794300 2.62514000  
H -0.64311500 0.31154700 1.01324100  
H -4.04815700 -2.08722500 -1.26495300

#### TS4-4e

C 1.84721700 -1.04333400 0.28069600  
H 1.75812600 -1.53443900 1.25869900  
H 1.68419700 -1.82479900 -0.47399300  
C 3.25196500 -0.45312600 0.11605600  
H 3.42039000 0.33340400 0.86334200  
H 3.34631700 0.02660700 -0.86695700  
C 4.35820800 -1.52202100 0.25842300  
H 4.18702800 -2.32214800 -0.47623300  
C 5.70698700 -0.98403400 0.08333800  
C 6.82250400 -0.51703000 -0.06862000  
Si 8.50829400 0.17391100 -0.29968800  
C 8.58640000 1.06496900 -1.96743100  
H 7.86050600 1.88490600 -2.01498200  
H 9.58361600 1.49036000 -2.13691200  
H 8.36997100 0.37974800 -2.79513100  
C 8.87325900 1.39594600 1.09807300  
H 8.15055800 2.22005300 1.10412300  
H 8.82772600 0.90570700 2.07733000  
H 9.87498000 1.82990200 0.98688000  
C 9.76428000 -1.24040600 -0.26683900  
H 9.72973500 -1.78136800 0.68578300  
H 9.56909500 -1.96300100 -1.06752200  
H 10.78503600 -0.86032400 -0.39973300  
C 0.73481700 0.01283000 0.15501900  
H 0.88839400 0.79057900 0.92087500

C -0.64482800 -0.52734000 0.31600600  
 C -1.24955500 -1.66480100 0.58768900  
 H -0.90719900 -2.69126800 0.49551300  
 C -4.36436600 -1.58882900 -1.49454100  
 C -5.57750500 -2.04050200 -2.00069300  
 C -6.73592400 -1.34523100 -1.66009700  
 C -6.62912600 -0.23583000 -0.82549800  
 C -5.37703400 0.16310400 -0.34635700  
 N -4.25611900 -0.50992400 -0.69506800  
 H -7.70618700 -1.66422000 -2.03027900  
 H -3.43494700 -2.10237300 -1.71476700  
 H -5.60505800 -2.91975400 -2.63546800  
 H -7.51246300 0.32160600 -0.53004700  
 Ni -2.39838400 -0.09081000 -0.04362300  
 C -5.24713600 1.34349700 0.59009200  
 H -6.25146100 1.72314100 0.80765600  
 H -4.82452300 0.98090600 1.53631800  
 C -4.38285900 2.49855100 0.02975700  
 H -4.55726700 3.41043200 0.61396400  
 H -4.67410900 2.71668400 -1.00535000  
 P -2.56873000 2.07205300 0.05838100  
 C -2.00534900 2.73269100 1.68803700  
 H -2.44251400 2.12068100 2.48207500  
 H -0.91755200 2.63339500 1.75713000  
 H -2.28002100 3.78478700 1.82761700  
 C -1.83436600 3.26810900 -1.14777000  
 H -2.10964000 4.30325300 -0.91417600  
 H -0.74346800 3.17966100 -1.12694600  
 H -2.17403700 3.02637200 -2.15975200  
 H 0.81766500 0.53464600 -0.80946400  
 H 4.27872200 -1.99723800 1.24668400  
 C -2.76814500 -1.79657100 1.68697000  
 O -3.18195800 -2.93262300 1.60731500  
 O -2.99377400 -0.75027000 2.29602400

#### INT6-4e

C -1.71230700 -1.54672100 -0.23315700  
 H -1.69819600 -2.01844500 -1.22487700  
 H -1.63915700 -2.36193700 0.49844400  
 C -3.03597200 -0.79744200 -0.04034200  
 H -3.12201300 0.01137100 -0.77828100  
 H -3.05920100 -0.31937200 0.94798000  
 C -4.26683900 -1.72183200 -0.17329800  
 H -4.20133300 -2.52471100 0.57479600

C -5.53597900 -1.01126300 -0.01833100  
 C -6.57942400 -0.39452800 0.11112500  
 Si -8.15543200 0.52843800 0.29968200  
 C -8.25706200 1.22925200 2.05460200  
 H -7.42166200 1.90805100 2.26171400  
 H -9.18857500 1.79147400 2.19736200  
 H -8.23054000 0.42993400 2.80411500  
 C -8.19608800 1.94310900 -0.95710500  
 H -7.36044200 2.63560100 -0.80318900  
 H -8.13123600 1.56522600 -1.98394300  
 H -9.12711100 2.51723500 -0.86952300  
 C -9.60405200 -0.64871700 -0.00756700  
 H -9.56238600 -1.07670600 -1.01574100  
 H -9.59879900 -1.47949000 0.70732600  
 H -10.56267000 -0.12461100 0.09475700  
 C -0.49086100 -0.62198700 -0.08971100  
 H -0.62247600 0.21692100 -0.78913000  
 C 0.86937500 -1.25740600 -0.27902700  
 C 1.02693400 -2.57529400 -0.49207000  
 H 0.21830200 -3.29620300 -0.60555500  
 C 5.10280200 -0.72367100 1.25090800  
 C 6.39589300 -0.57698200 1.74335000  
 C 7.15212000 0.51277900 1.32212000  
 C 6.57838900 1.41339800 0.42806100  
 C 5.26900300 1.21310900 -0.01866100  
 N 4.53873400 0.15397300 0.39508400  
 H 8.16908500 0.65856500 1.67544400  
 H 4.49347900 -1.58312600 1.49872600  
 H 6.79384700 -1.31589800 2.43078400  
 H 7.13742900 2.27151500 0.06807200  
 Ni 2.60134800 -0.40444300 -0.09991700  
 C 4.63058600 2.19968400 -0.96824600  
 H 5.36737400 2.96908600 -1.22186500  
 H 4.37471700 1.69054100 -1.90744500  
 C 3.37775300 2.86863600 -0.36781100  
 H 3.11489700 3.76786200 -0.93845600  
 H 3.58294600 3.18554900 0.66179300  
 P 1.91975500 1.71450800 -0.35925800  
 C 1.21912800 2.03369400 -2.04392900  
 H 1.96406500 1.76100600 -2.79821700  
 H 0.33507300 1.41583100 -2.21577900  
 H 0.95196000 3.08907100 -2.17005800  
 C 0.74938500 2.59773500 0.76828900  
 H 0.65198400 3.65194300 0.48543900

H -0.23583800 2.12798300 0.73272200  
H 1.12031300 2.53653500 1.79631400  
H -0.52207400 -0.16591500 0.91306000  
H -4.24392400 -2.21928200 -1.15357500  
C 2.42299300 -3.08246600 -0.50440400  
O 2.74038300 -4.24906300 -0.68524000  
O 3.30065900 -2.11385000 -0.25933100

#### INT4-4e

C 0.97572800 -3.34424700 -1.68734900  
H 1.22961000 -4.38205500 -1.93981700  
H -0.11999500 -3.28346100 -1.72470600  
C 1.58537000 -2.46482700 -2.79192100  
H 2.67802000 -2.57213200 -2.78226700  
H 1.24274800 -2.83772300 -3.76602700  
C 1.24444700 -0.95676700 -2.73498700  
H 0.15869300 -0.81363700 -2.78931100  
C 1.78460600 -0.33586200 -1.51626200  
C 2.48643800 0.04530000 -0.56940700  
Si 3.86548300 0.39873900 0.64008000  
C 4.81832600 1.90486900 0.00339800  
H 4.19081400 2.80210700 -0.04669700  
H 5.66271300 2.12746300 0.66771000  
H 5.22138900 1.72466900 -0.99980200  
C 3.15307200 0.71247200 2.35663500  
H 2.51663200 1.60330100 2.39518100  
H 2.54462400 -0.13597500 2.68793200  
H 3.96620900 0.85255500 3.08024700  
C 4.99367500 -1.11660800 0.66061300  
H 4.46610100 -1.99996800 1.03678000  
H 5.37369700 -1.34949000 -0.34054000  
H 5.85692200 -0.93993700 1.31451600  
C 1.44622300 -3.08103600 -0.22793300  
H 1.37979300 -4.03399600 0.31799000  
C 0.62117900 -2.06492300 0.52507500  
C -0.24480200 -2.41717500 1.49000400  
H -0.38630900 -3.43536000 1.85656300  
Ni 0.49868800 -0.18778000 0.16504000  
H 2.50880400 -2.80617100 -0.24406900  
H 1.67270800 -0.45018800 -3.61092000  
C -1.11741600 -1.32958800 2.00261800  
O -2.03332500 -1.47901700 2.80247100  
O -0.83460000 -0.15769700 1.43962800  
P -4.80816500 -0.32921000 -0.58690100

C -5.87506600 -0.23896000 0.94324700  
C -3.46466600 0.86704900 -0.04330100  
C -3.97697800 -1.96879100 -0.25889100  
H -6.35657700 0.74335600 1.00483600  
H -5.29454300 -0.41065400 1.85730000  
H -6.66667400 -0.99378800 0.88034400  
H -3.95325000 1.84639100 0.05256700  
H -3.06178700 0.59081600 0.93632200  
H -3.55884800 -2.02880600 0.75191400  
H -3.17639300 -2.13816900 -0.98748100  
H -4.71317100 -2.76999500 -0.39092600  
C -2.30307600 0.96555600 -1.05563900  
H -2.70854600 1.14561600 -2.06147800  
H -1.76057400 0.01669400 -1.08311600  
C -1.33636700 2.08125100 -0.72690100  
C -1.74284500 3.41417500 -0.89613200  
C 0.73923200 2.80981900 0.00976800  
C -0.88039300 4.45742400 -0.58729300  
H -2.74186500 3.61383800 -1.27152900  
C 0.39651500 4.14901400 -0.11706100  
H 1.72507000 2.52621300 0.35836200  
H -1.19365900 5.48999900 -0.71416800  
H 1.11297700 4.92176700 0.14159700  
N -0.09267100 1.79360200 -0.28178800

#### INT4-4e'

C 1.93510900 3.50098400 1.41721000  
H 2.47139100 4.44736900 1.56661400  
H 0.86589600 3.74087100 1.48682500  
C 2.33614300 2.57801000 2.57774200  
H 3.42201700 2.41665900 2.56198500  
H 2.10853600 3.08514800 3.52445600  
C 1.64081100 1.19729000 2.61765000  
H 0.55148800 1.32188200 2.63343800  
C 2.04331500 0.35428100 1.48191700  
C 2.64202800 -0.29076500 0.61129600  
Si 3.89701200 -1.13722000 -0.47745000  
C 4.09796000 -2.92172100 0.11546100  
H 3.16542800 -3.49166400 0.03557500  
H 4.85397600 -3.43997100 -0.48761000  
H 4.42411700 -2.95892200 1.16131200  
C 3.32749100 -1.06795000 -2.27223700  
H 2.38091100 -1.59731200 -2.42478700  
H 3.17835800 -0.03230300 -2.59665500



|               |             |             |             |    |             |             |             |
|---------------|-------------|-------------|-------------|----|-------------|-------------|-------------|
| H             | 4.07910800  | -1.52477700 | -2.92841800 | O  | -1.06675700 | 0.58083700  | 1.90909100  |
| C             | 5.52140700  | -0.19648000 | -0.25346200 | O  | -1.83619600 | 2.40155900  | 3.00676800  |
| H             | 5.42280000  | 0.84801400  | -0.57038400 | C  | -1.18779300 | 1.87162300  | 2.11345500  |
| H             | 5.84686400  | -0.20175800 | 0.79305100  | C  | -0.48697000 | 2.68162000  | 1.05997500  |
| H             | 6.31704500  | -0.65427000 | -0.85447500 | C  | 0.44185500  | 2.16343800  | 0.23100700  |
| C             | 2.23825400  | 2.99803100  | -0.02140500 | H  | -0.85627800 | 3.69692300  | 0.89581000  |
| H             | 2.35223800  | 3.88442000  | -0.66336300 | C  | 2.99546500  | 2.12246500  | 0.99971300  |
| C             | 1.15411300  | 2.13102200  | -0.61559500 | H  | 3.90796500  | 1.59921300  | 1.31304200  |
| C             | 0.25614600  | 2.61986500  | -1.48735400 | H  | 2.56893600  | 2.60291800  | 1.88666800  |
| H             | 0.25522600  | 3.64063100  | -1.87365800 | C  | 2.04593300  | 1.09140100  | 0.46238300  |
| Ni            | 0.74986300  | 0.28084700  | -0.21321800 | C  | 2.01747600  | -0.03903300 | -0.16695900 |
| H             | 3.20990800  | 2.48585800  | -0.02284600 | Si | 3.06347000  | -1.32524500 | -1.00867700 |
| H             | 1.91233100  | 0.67726800  | 3.54703300  | C  | 4.56726500  | -0.48019300 | -1.79723500 |
| C             | -0.84025200 | 1.70123100  | -1.88049900 | H  | 5.19277300  | 0.01435400  | -1.04450400 |
| O             | -1.80506700 | 1.99984700  | -2.57153100 | H  | 5.19528600  | -1.21271000 | -2.32014200 |
| O             | -0.68989900 | 0.48471800  | -1.35129300 | H  | 4.26280000  | 0.27736200  | -2.52899100 |
| P             | -0.31111600 | -1.85065400 | 0.16829600  | C  | 3.66339500  | -2.60800600 | 0.25114400  |
| C             | -0.00267800 | -3.17407600 | -1.09097400 | H  | 2.82967900  | -3.16502800 | 0.69248300  |
| C             | -2.15347200 | -1.67269200 | 0.05073700  | H  | 4.32966700  | -3.33354200 | -0.23259200 |
| C             | -0.04181800 | -2.74764100 | 1.76694500  | H  | 4.22227400  | -2.13461700 | 1.06691800  |
| H             | -0.21928800 | -2.76887800 | -2.08443900 | C  | 2.05009400  | -2.18101100 | -2.35720100 |
| H             | -0.63994500 | -4.04860100 | -0.91695700 | H  | 2.65445000  | -2.92965200 | -2.88447000 |
| H             | 1.04425200  | -3.49218900 | -1.06879200 | H  | 1.17702100  | -2.69188300 | -1.93581300 |
| H             | -2.34222200 | -1.43128600 | -0.99924700 | H  | 1.68825200  | -1.46142700 | -3.10124400 |
| H             | -2.63650200 | -2.63253000 | 0.27588500  | C  | 3.33740100  | 3.17789700  | -0.07314900 |
| H             | -0.60776400 | -3.68510100 | 1.80653800  | H  | 4.06591200  | 3.88829100  | 0.33802100  |
| H             | -0.35946900 | -2.11300700 | 2.60068100  | C  | 0.93618400  | 2.98079900  | -0.95365100 |
| H             | 1.02252500  | -2.96721000 | 1.89812800  | H  | 0.09933800  | 3.58219400  | -1.33160700 |
| C             | -2.73523800 | -0.54905300 | 0.93223500  | C  | 2.09691500  | 3.92562700  | -0.57336400 |
| H             | -2.13239500 | 0.35320200  | 0.78562200  | H  | 2.36331600  | 4.54639400  | -1.43861000 |
| H             | -2.69942200 | -0.83105800 | 1.98985500  | H  | 1.73827100  | 4.60955800  | 0.20768600  |
| C             | -4.17562700 | -0.25349700 | 0.56761500  | H  | 1.24755000  | 2.31570900  | -1.76765800 |
| C             | -4.47754900 | 0.51449700  | -0.56909100 | H  | 3.82802500  | 2.66884500  | -0.91306200 |
| C             | -6.40392200 | -0.54744800 | 1.04389800  | P  | -4.20135200 | 0.29500800  | -1.79482300 |
| C             | -5.81504500 | 0.74432900  | -0.88190500 | C  | -5.50571000 | 0.99407800  | -0.65682400 |
| H             | -3.68102200 | 0.91793400  | -1.19149700 | C  | -3.23913400 | -0.69660000 | -0.52155500 |
| C             | -6.80544700 | 0.20403400  | -0.05931800 | C  | -3.10580500 | 1.79970900  | -1.94840300 |
| H             | -7.14527500 | -0.98633900 | 1.71101100  | H  | -6.18420200 | 0.19538400  | -0.33798100 |
| H             | -6.07791200 | 1.33910400  | -1.75285300 | H  | -6.10022200 | 1.73788400  | -1.19857800 |
| H             | -7.86065900 | 0.36043200  | -0.26419900 | H  | -5.07478400 | 1.46669500  | 0.23398500  |
| N             | -5.12297100 | -0.77920800 | 1.36136200  | H  | -2.96772000 | -0.07821200 | 0.34291900  |
|               |             |             |             | H  | -3.91873400 | -1.48084400 | -0.16212000 |
|               |             |             |             | H  | -3.64517400 | 2.57920200  | -2.49818100 |
|               |             |             |             | H  | -2.20727900 | 1.55430300  | -2.52468700 |
| <b>TS2-4e</b> |             |             |             |    |             |             |             |
| Ni            | 0.24819000  | 0.17577100  | 0.58722300  |    |             |             |             |

H -2.80110500 2.19771900 -0.97350300  
 C -1.96810000 -1.35618900 -1.10253500  
 H -1.25722400 -0.58545700 -1.42269400  
 H -2.22941700 -1.95160000 -1.98618800  
 C -1.29859100 -2.24097900 -0.08085800  
 C -1.72254700 -3.56238500 0.11507400  
 C 0.22052100 -2.46010200 1.67181200  
 C -1.15636200 -4.33516100 1.12257700  
 H -2.50276500 -3.96499900 -0.52353500  
 C -0.16756700 -3.76881300 1.92800300  
 H 0.98699600 -1.97255400 2.26408200  
 H -1.48323700 -5.35886400 1.28157100  
 H 0.29717000 -4.32317600 2.73633400  
 N -0.31787000 -1.71742200 0.68584500

#### TS2-4e'

Ni -0.63878100 0.22198400 -0.14568200  
 O 0.92309500 1.04010400 -0.84300700  
 O 1.99386600 3.02138800 -0.83852100  
 C 1.04176900 2.30968200 -0.53223600  
 C -0.09068500 2.79966300 0.30965300  
 C -1.17915300 2.04637800 0.55589500  
 H 0.04272800 3.75520100 0.82087400  
 P 0.56358600 -1.69760600 0.16094100  
 C -3.25841100 2.01618900 -1.18840400  
 H -3.90743400 1.55242400 -1.94220000  
 H -2.60026600 2.71964700 -1.70942800  
 C -2.45429900 0.92244000 -0.55651400  
 C -2.50517500 -0.31460100 -0.17385100  
 Si -3.76956000 -1.67538600 -0.03087300  
 C -5.38304000 -1.12399200 -0.86158600  
 H -5.23864600 -0.92707100 -1.93057600  
 H -6.14870200 -1.90490900 -0.77055800  
 H -5.78540900 -0.21282400 -0.40402300  
 C -3.19117300 -3.27085500 -0.86989300  
 H -2.34608100 -3.73544800 -0.35081800  
 H -4.00857000 -4.00282900 -0.88077300  
 H -2.89440400 -3.09157100 -1.90988300  
 C -4.09137900 -2.00028100 1.80772800  
 H -4.82537000 -2.80519500 1.93946600  
 H -3.17638700 -2.29160600 2.33598400  
 H -4.48712600 -1.10615300 2.30374000  
 C 0.07064700 -2.75541800 1.59626800  
 H 0.15051700 -2.17072200 2.51847100

H -0.96779400 -3.07981700 1.48970100  
 H 0.71661000 -3.63664100 1.68082700  
 C 0.63925300 -2.89954500 -1.24123600  
 H 0.99979900 -2.38626000 -2.13693800  
 H 1.31270300 -3.73322300 -1.01292100  
 H -0.35934100 -3.29075100 -1.45010100  
 C 2.34966000 -1.33353700 0.53586000  
 H 2.34606000 -0.46489900 1.20349400  
 H 2.78125200 -2.17692400 1.08970100  
 C -4.11922800 2.75886400 -0.14472200  
 H -4.74137100 3.50399200 -0.65660600  
 C -2.21742900 2.50104500 1.56497400  
 H -1.69862600 3.04344700 2.36656800  
 C -3.27799700 3.43634100 0.94173700  
 H -3.93651600 3.81688600 1.73328000  
 H -2.75873800 4.30611800 0.51761100  
 H -2.70579900 1.63616100 2.02804700  
 H -4.80485700 2.03550500 0.31591300  
 C 3.21795800 -1.02422700 -0.70494100  
 H 3.38513000 -1.94684900 -1.27154600  
 H 2.69445000 -0.30264700 -1.33468800  
 C 4.56129800 -0.46043600 -0.29518100  
 C 4.79501800 0.92262300 -0.32789500  
 C 6.67486400 -0.86982100 0.50753700  
 C 6.04054300 1.39750600 0.08051900  
 H 4.01368300 1.60262400 -0.66153900  
 C 7.00642600 0.48541100 0.50698200  
 H 7.40160300 -1.61383700 0.83301500  
 H 6.25190700 2.46365300 0.06236800  
 H 7.99119100 0.81062500 0.83019900  
 N 5.48531700 -1.34494800 0.11979900

#### INT7-4e

C -4.48967700 -1.79484600 1.50874000  
 H -5.12649600 -1.96095300 2.38720800  
 H -4.77990400 -2.54268600 0.75768100  
 C -4.70732400 -0.38895300 0.93904900  
 C -3.79654900 -0.13901100 -0.27585400  
 H -3.94917700 0.87607400 -0.65207100  
 C -2.31496500 -0.38440000 0.02740600  
 C -1.31402600 0.41402200 -0.39833600  
 Si -1.42814300 1.73355400 -1.75253300  
 C -2.49471100 3.25604000 -1.31929800  
 H -2.10906700 3.79691100 -0.44691900

H -2.49091300 3.95708800 -2.16457600  
 H -3.54005100 3.00023300 -1.11379300  
 C 0.30693300 2.39921000 -2.16324300  
 H 0.25107700 3.07245100 -3.02896700  
 H 0.74965100 2.96934200 -1.33722300  
 H 0.99586900 1.58593500 -2.41946500  
 C -2.10191700 0.92692200 -3.33117100  
 H -1.50569300 0.03928900 -3.57141600  
 H -3.14304600 0.60477000 -3.21628000  
 H -2.05590500 1.61488200 -4.18520800  
 C -3.01177700 -2.00233900 1.88475000  
 H -2.78353900 -1.33640200 2.73323100  
 C -2.07757700 -1.67807700 0.73014500  
 C -1.17854600 -2.59454000 0.31042000  
 H -1.15378900 -3.55912300 0.81559300  
 Ni 0.51083900 -0.06820800 -0.12577200  
 H -2.84099500 -3.02719600 2.23403600  
 H -4.10444300 -0.82480400 -1.08149500  
 C -0.28711700 -2.58195700 -0.90350100  
 O -0.01679900 -3.67217300 -1.41159500  
 O 0.20424400 -1.45351300 -1.36073300  
 P 0.63605600 1.18455000 1.68174000  
 C -0.04608400 0.36024200 3.18559000  
 C 2.40214700 1.54425600 2.14640000  
 C -0.15158300 2.85333600 1.77027400  
 H 0.41676600 -0.62331200 3.30731200  
 H -1.12099300 0.21365000 3.05187500  
 H 0.12782700 0.95952200 4.08651900  
 H 2.45139600 2.46322800 2.74280900  
 H 2.77740300 0.72846900 2.77568500  
 H -1.21938300 2.75330800 1.56036200  
 H 0.28188800 3.51781300 1.01702500  
 H -0.01625300 3.30017000 2.76149400  
 C 3.27690000 1.67791300 0.88273100  
 H 4.21445800 2.18085400 1.14300800  
 H 2.77508600 2.32176200 0.14732400  
 C 3.61803800 0.35136500 0.23616000  
 C 4.96167900 -0.00862700 0.09427800  
 C 2.95779700 -1.62430700 -0.78738600  
 C 5.30185000 -1.21966100 -0.50379900  
 H 5.73209400 0.66773300 0.45166200  
 C 4.27570800 -2.04200900 -0.95531200  
 H 2.13033400 -2.21649000 -1.15935600  
 H 6.34380100 -1.50665200 -0.61624900

H 4.47420400 -2.99339400 -1.43767900  
 N 2.62025000 -0.45872800 -0.19547200  
 H -4.49177000 0.35839100 1.71727100  
 H -5.75725200 -0.24993600 0.65024500

#### TS6-4e

C 4.73370600 -0.28830200 2.02547500  
 H 5.42670900 -0.80145800 2.70433800  
 H 5.14809400 0.71402400 1.84590600  
 C 4.61995300 -1.03376100 0.69382200  
 C 3.70849900 -0.26960600 -0.27618200  
 H 3.56271000 -0.87416300 -1.17779700  
 C 2.36312900 0.11663100 0.34357300  
 C 1.25716400 0.39080400 -0.47383800  
 Si 1.31841600 0.91659700 -2.31503100  
 C 1.84881300 -0.51508300 -3.45184700  
 H 1.16819500 -1.37044300 -3.37195300  
 H 1.81970500 -0.17307700 -4.49482100  
 H 2.86495000 -0.87317800 -3.25509800  
 C -0.39947300 1.47236700 -2.89125400  
 H -0.35036200 1.81954700 -3.93198700  
 H -1.13403000 0.65918600 -2.84468600  
 H -0.77164300 2.29544800 -2.27330700  
 C 2.51348100 2.37130500 -2.53602700  
 H 2.22751700 3.19653500 -1.87406700  
 H 3.54857000 2.09831900 -2.30317800  
 H 2.48942700 2.74235700 -3.56870600  
 C 3.35275100 -0.16575900 2.68083400  
 H 3.04120800 -1.16703700 3.02040800  
 C 2.28405900 0.37737500 1.74094000  
 C 1.28949900 1.17411500 2.28553900  
 H 1.30672900 1.39278400 3.34957400  
 Ni -0.55229800 0.00118100 -0.04745500  
 H 3.40803000 0.45770300 3.58073500  
 H 4.24670700 0.63603800 -0.60290800  
 C 0.35498900 1.98208800 1.54235600  
 O -0.32875700 2.88965900 2.02045500  
 O 0.23943600 1.74158000 0.18507100  
 P -0.66082500 -2.16601400 0.07279200  
 C 0.25107500 -2.92686400 1.48657100  
 C -2.42502500 -2.69264500 0.33167100  
 C -0.12918700 -3.23623400 -1.34197300  
 H -0.12474400 -2.51191500 2.42644000  
 H 1.30761100 -2.65412400 1.40097200

H 0.15557800 -4.01855200 1.50335600  
 H -2.54615100 -3.75744400 0.09592700  
 H -2.67220900 -2.56289500 1.39213800  
 H 0.92947800 -3.05533600 -1.55020700  
 H -0.69669000 -2.98038700 -2.24249600  
 H -0.27271900 -4.30018800 -1.11993400  
 C -3.37952800 -1.84526000 -0.53869800  
 H -4.33860600 -2.36687300 -0.62932100  
 H -2.97807400 -1.76812600 -1.55934100  
 C -3.65446100 -0.45158100 -0.00752200  
 C -4.97541300 -0.05739600 0.22528200  
 C -2.88684800 1.63468700 0.67431100  
 C -5.24812800 1.22654100 0.69336800  
 H -5.78192800 -0.75891100 0.03424100  
 C -4.18078100 2.08839700 0.92203300  
 H -2.03186600 2.27774600 0.86444500  
 H -6.27234300 1.54058900 0.87551200  
 H -4.32929700 3.09796100 1.29086400  
 N -2.61806500 0.39158900 0.21913000  
 H 4.21099200 -2.03910100 0.87567100  
 H 5.60875500 -1.17220600 0.23783100

#### INT2-4e

C 2.03852700 -1.23716500 -0.86167800  
 H 1.83194400 -2.17715200 -0.33251300  
 H 2.08280700 -1.48491100 -1.93048200  
 C 3.38316400 -0.66269600 -0.40275200  
 H 3.34080100 -0.41037100 0.66481000  
 H 3.59250700 0.27394400 -0.93553200  
 C 4.55409500 -1.64244300 -0.63814900  
 H 4.59472600 -1.91097100 -1.70365700  
 C 5.84752000 -1.09906200 -0.22450100  
 C 6.91413900 -0.62346900 0.12410100  
 Si 8.52576500 0.09208400 0.64014000  
 C 8.83943000 1.67590200 -0.34627400  
 H 8.05020800 2.41635100 -0.17222600  
 H 9.79542900 2.13197600 -0.05964900  
 H 8.87500100 1.47332300 -1.42287500  
 C 8.46187800 0.48697200 2.48951900  
 H 7.66578500 1.20544000 2.71648700  
 H 8.27535400 -0.41570100 3.08262800  
 H 9.41082400 0.92063500 2.82943300  
 C 9.89710100 -1.16483400 0.29663200  
 H 9.73404500 -2.09363300 0.85530000

H 9.94585400 -1.42047000 -0.76807900  
 H 10.87582000 -0.76483600 0.59017200  
 C 0.86845600 -0.26302000 -0.62557100  
 H 0.80706500 -0.00819300 0.44161800  
 C -0.43911300 -0.79661600 -1.08517400  
 C -1.17819500 -1.67215100 -1.64429900  
 H -1.27736400 -2.61613300 -2.15804700  
 C -2.27155100 2.66429200 -0.72387600  
 C -2.40494800 3.90888200 -0.12012400  
 C -2.92756900 3.96690200 1.17196800  
 C -3.30040100 2.78074100 1.79640900  
 C -3.14548400 1.55953700 1.12950500  
 N -2.62538600 1.51135800 -0.11919800  
 H -3.04230600 4.91869800 1.68305400  
 H -1.87517100 2.56603300 -1.72920300  
 H -2.10310200 4.80406200 -0.65360700  
 H -3.71307400 2.78634100 2.80073800  
 Ni -2.25928100 -0.24029000 -1.08341400

C -3.59205600 0.26287600 1.75985300  
 H -2.93310300 -0.54094100 1.40861700  
 H -3.47782100 0.32525300 2.84858600  
 C -5.06037800 -0.06868000 1.41318300  
 H -5.19042200 -0.09424700 0.32445500  
 H -5.71188000 0.72430500 1.80388600  
 P -5.64046700 -1.68535100 2.17742200  
 C -4.84195300 -2.90007100 1.00498200  
 H -3.76001600 -2.93094100 1.17187800  
 H -5.23381300 -3.90334700 1.20626300  
 H -5.02576700 -2.64956200 -0.04660600  
 C -7.37607000 -1.70372400 1.48980400  
 H -7.40111000 -1.54243500 0.40522900  
 H -7.84269800 -2.66985600 1.71085800  
 H -7.97553600 -0.92688100 1.97682500  
 H 1.06923200 0.68470800 -1.14531200  
 H 4.35960800 -2.57953100 -0.09680700  
 C -3.28953000 0.21796300 -2.68927300  
 O -4.18274700 -0.35886000 -2.08179100  
 O -2.90754200 0.84734900 -3.63136900

#### TS1-4e

C -1.97840400 1.23490800 -0.45861500  
 H -1.79649900 2.01116600 0.29655300  
 H -1.98371200 1.74272300 -1.43240100  
 C -3.33947500 0.57672800 -0.20700100

H -3.34078500 0.07738200 0.77045600  
 H -3.52504100 -0.20404400 -0.95608800  
 C -4.49880000 1.59653600 -0.24948300  
 H -4.51022900 2.09376300 -1.23011600  
 C -5.80666500 0.99397800 0.00616900  
 C -6.88855600 0.47698200 0.22394900  
 Si -8.53101000 -0.27685200 0.55744800  
 C -8.68674800 -1.88338400 -0.43013000  
 H -7.90846100 -2.60216700 -0.14878700  
 H -9.66004900 -2.35732800 -0.25101400  
 H -8.59767600 -1.69931600 -1.50696900  
 C -8.67784300 -0.64267900 2.40778500  
 H -7.89768500 -1.33707800 2.74039600  
 H -8.58513900 0.27283300 3.00324600  
 H -9.65003900 -1.09571300 2.63938800  
 C -9.88167100 0.93741700 0.02926200  
 H -9.80195800 1.88419200 0.57567800  
 H -9.81633500 1.16405300 -1.04112800  
 H -10.87834800 0.52147800 0.22342200  
 C -0.81596300 0.22526500 -0.42700100  
 H -0.80482300 -0.29664400 0.54132200  
 C 0.52636100 0.83111200 -0.65885300  
 C 1.01429000 2.04775400 -0.84437900  
 H 0.44463000 2.97170100 -0.86199900  
 C 1.74734700 -2.31233900 -1.54396100  
 C 1.85945800 -3.69449600 -1.58374400  
 C 2.68152900 -4.32236300 -0.64709200  
 C 3.35515200 -3.53781400 0.28290400  
 C 3.21100800 -2.14541900 0.27293900  
 N 2.40509900 -1.54843200 -0.64269800  
 H 2.79153300 -5.40284800 -0.63971200  
 H 1.11655400 -1.77585500 -2.24293400  
 H 1.31018600 -4.25814600 -2.33014100  
 H 4.00032800 -3.99080800 1.02891100  
 Ni 2.27163400 0.33772200 -0.76997800  
 C 3.96919100 -1.27558600 1.24439200  
 H 3.32758100 -0.43900800 1.54571600  
 H 4.18849000 -1.85991000 2.14594300  
 C 5.28676400 -0.73145400 0.64758300  
 H 5.07520200 -0.09331900 -0.21896200  
 H 5.90602500 -1.57083500 0.30469000  
 P 6.30402900 0.22809100 1.90806700  
 C 5.26031900 1.76852600 2.06031900  
 H 4.39329400 1.57539800 2.70172100

H 5.85395500 2.55144100 2.54541400  
 H 4.91119800 2.13041500 1.08660700  
 C 7.61592800 0.87067300 0.74587500  
 H 7.18641300 1.38286800 -0.12327500  
 H 8.26205300 1.57296500 1.28365000  
 H 8.24287000 0.04211300 0.39829500  
 H -0.99386200 -0.55901700 -1.17812200  
 H -4.31230800 2.38952000 0.48910000  
 C 2.65475200 2.62881700 -1.11496800  
 O 3.62780100 1.81156500 -1.11153900  
 O 2.60183000 3.83048700 -1.27115800

#### INT3-4e

C 1.60841400 -1.61371200 -0.32726900  
 H 1.41882100 -2.22639100 0.56403100  
 H 1.67371900 -2.30946100 -1.17432200  
 C 2.94037700 -0.87079700 -0.17035100  
 H 2.88598000 -0.17376400 0.67599300  
 H 3.14053100 -0.26254200 -1.06217600  
 C 4.12713700 -1.83456900 0.05245900  
 H 4.18669000 -2.53863500 -0.78992600  
 C 5.40841600 -1.14518300 0.20164600  
 C 6.46637800 -0.55229600 0.32314400  
 Si 8.07309700 0.31911700 0.50696300  
 C 8.32479800 1.46939300 -0.97432300  
 H 7.52598400 2.21735100 -1.03761700  
 H 9.27922800 2.00491600 -0.89490100  
 H 8.33304300 0.90925800 -1.91641200  
 C 8.05082300 1.32864500 2.10709400  
 H 7.25049000 2.07759900 2.09557400  
 H 7.89318200 0.68584800 2.98076700  
 H 9.00191100 1.85749200 2.24792600  
 C 9.46287700 -0.96257600 0.57345000  
 H 9.33041200 -1.64787300 1.41850600  
 H 9.49366800 -1.56461600 -0.34191800  
 H 10.43946900 -0.47531500 0.68719100  
 C 0.42289500 -0.65613100 -0.54399400  
 H 0.37991300 0.05711400 0.29289700  
 C -0.91922200 -1.32373300 -0.68832200  
 C -1.16267300 -2.64383000 -0.72639900  
 H -0.40308300 -3.42292900 -0.67933400  
 C -1.27798100 2.03959400 -1.75603900  
 C -1.01557600 3.40031100 -1.85425200  
 C -1.57259100 4.25394600 -0.90260300

C -2.37802000 3.71350500 0.09725800  
 C -2.60802700 2.33589100 0.14062000  
 N -2.04400500 1.51251600 -0.77988900  
 H -1.38768600 5.32353400 -0.94112300  
 H -0.87152800 1.33243700 -2.46955100  
 H -0.39072800 3.77344600 -2.65847100  
 H -2.83477900 4.34970300 0.84839400  
 Ni -2.55050300 -0.36344700 -0.77117000  
 C -3.51370100 1.70430400 1.17071000  
 H -2.95603900 0.91831200 1.69581300  
 H -3.79307700 2.45723000 1.91555000  
 C -4.79240100 1.10244700 0.54795200  
 H -4.55000600 0.30685700 -0.18035800  
 H -5.33242400 1.88026600 -0.00707400  
 P -5.97584800 0.38920800 1.82670400  
 C -5.04198200 -1.15059000 2.31336100  
 H -4.20707200 -0.89329500 2.97435200  
 H -5.71548900 -1.80129300 2.88215100  
 H -4.65940700 -1.70146500 1.44628900  
 C -7.21130400 -0.35790400 0.64575800  
 H -6.73780300 -1.01832100 -0.09019600  
 H -7.94515000 -0.93819600 1.21512400  
 H -7.75206400 0.43756900 0.12133400  
 H 0.62970100 -0.04114700 -1.43301400  
 H 3.93491400 -2.44680900 0.94523800  
 C -2.59741800 -3.03309900 -0.80882900  
 O -3.39157300 -1.95631100 -0.81307900  
 O -3.01494600 -4.17687100 -0.84982300

#### TS5-4e

C 4.16608700 0.26205300 -0.27246000  
 H 5.16969600 0.04578500 -0.65746100  
 H 3.92920400 1.28864600 -0.57692100  
 C 4.15122200 0.17612000 1.25892300  
 H 4.33165000 -0.85902100 1.56764600  
 H 4.95711400 0.78188000 1.68942700  
 C 2.78569400 0.66000500 1.82379300  
 H 2.84429200 1.72335100 2.08750500  
 C 1.66897300 0.51788400 0.82682400  
 C 0.86601000 1.25122100 0.11910800  
 Si 0.49821000 3.01345800 -0.32203000  
 C 0.29263500 3.17447000 -2.20061800  
 H -0.56011400 2.59248300 -2.56903700  
 H 0.12492900 4.22125600 -2.48381400

H 1.18673700 2.82568500 -2.73089100  
 C -1.07903100 3.61259000 0.53960900  
 H -1.27415300 4.66310800 0.28887600  
 H -1.95949900 3.02959100 0.25022700  
 H -0.98108700 3.54296700 1.62930200  
 C 1.93844700 4.12649200 0.21897900  
 H 2.07544100 4.10750600 1.30669000  
 H 2.88427400 3.81804200 -0.24177400  
 H 1.75200300 5.16840700 -0.07177100  
 C 3.14348900 -0.73117800 -0.90464600  
 H 2.72163800 -0.29038200 -1.81594500  
 C 2.01760200 -1.14935400 0.02859500  
 C 2.03934300 -2.36655500 0.62499200  
 H 2.87655500 -3.04856400 0.46902200  
 Ni 0.09460800 -0.57033600 0.13175100  
 H 3.67110600 -1.64634900 -1.20494900  
 H 2.53803300 0.10724800 2.73777000  
 C 0.86539700 -2.87867200 1.38875900  
 O 0.93027500 -3.86506700 2.11698900  
 O -0.22721000 -2.18363200 1.15196400  
 P -0.73554800 -1.33404700 -1.96394100  
 C -0.67344200 -3.17118800 -2.15304300  
 C -2.56766900 -0.97622400 -2.01290700  
 C -0.18991600 -0.74894500 -3.64024100  
 H -1.04492800 -3.62404500 -1.22907100  
 H 0.36866600 -3.48360800 -2.27730300  
 H -1.25773700 -3.52945400 -3.00837800  
 H -2.93048800 -0.99293200 -3.04842700  
 H -3.08308500 -1.78104700 -1.47590600  
 H 0.87248200 -0.97832300 -3.77447500  
 H -0.30638000 0.33737100 -3.71110100  
 H -0.75702400 -1.22255100 -4.45068600  
 C -2.90155200 0.38622700 -1.35817900  
 H -3.87379500 0.73437800 -1.72433400  
 H -2.16478300 1.13846900 -1.66781000  
 C -2.96114800 0.33479700 0.15403100  
 C -4.17042200 0.59114600 0.81238100  
 C -1.91922700 -0.07420500 2.18576600  
 C -4.23590100 0.51796600 2.20139600  
 H -5.05112700 0.84217700 0.22910500  
 C -3.08472600 0.17431900 2.90509500  
 H -1.00823000 -0.38306600 2.68361400  
 H -5.16947500 0.71751500 2.72024400  
 H -3.08065000 0.08896000 3.98676400

N -1.84681600 0.01600000 0.84625900

#### INT1-4f

C 3.33513200 0.08023900 -0.12307800

H 2.94981400 -0.59604300 -0.89875300

H 3.32545300 1.08730100 -0.56022800

C 4.76993400 -0.31454900 0.24449600

H 4.78479100 -1.32409800 0.67619400

H 5.15858000 0.35882800 1.01937000

C 5.72004800 -0.27739400 -0.97235600

H 5.71351300 0.73223800 -1.40684100

H 5.33465900 -0.94595000 -1.75545000

C 7.09523700 -0.65649900 -0.64378700

C 8.22430100 -0.97273100 -0.35298600

Si -0.00400900 3.19298600 -0.02075900

C -0.85688000 4.09825400 1.41840200

H -0.28613500 3.98759200 2.34811700

H -0.94866300 5.17165600 1.20746400

H -1.86656400 3.71213000 1.60368200

C 1.67370400 4.03626700 -0.32562900

H 2.31437500 3.97677300 0.56260600

H 2.21137800 3.56068900 -1.15496100

H 1.54860200 5.09789900 -0.57586500

C -1.06870500 3.39237400 -1.57859000

H -0.59830800 2.89769600 -2.43698200

H -2.05791900 2.93998400 -1.44095900

H -1.21300300 4.44932800 -1.83683200

C 2.37631800 0.05512700 1.08490400

H 2.75160000 0.75334600 1.84847200

H 2.40375900 -0.94397900 1.54044700

C 0.97748900 0.42726600 0.71164500

C 0.20465300 1.40801300 0.37238700

C -3.33407800 0.88002900 0.57947900

C -4.70067300 1.09794500 0.44630500

C -5.42821300 0.26630500 -0.40394800

C -4.75032800 -0.75073500 -1.07099600

C -3.37355000 -0.91959000 -0.88554500

N -2.66739000 -0.10130900 -0.06625400

H -6.49615400 0.40592300 -0.54581400

H -2.72399900 1.50774300 1.21825900

H -5.17329000 1.90779000 0.99282900

H -5.28003700 -1.42130900 -1.74113200

Ni -0.70946800 -0.29809500 0.36247800

C -2.64230100 -2.04928900 -1.57519300

H -3.32269400 -2.51471900 -2.29771000

H -1.79880500 -1.63755400 -2.14460400

C -2.12422000 -3.12725000 -0.59190800

H -1.84563600 -4.03252100 -1.14545500

H -2.92655300 -3.40863100 0.10139900

P -0.66141600 -2.49398600 0.39618600

C 0.75514000 -3.32341500 -0.47403300

H 0.84478300 -2.92150000 -1.48832300

H 1.68622800 -3.09773900 0.05557500

H 0.63094400 -4.41195200 -0.52808100

C -0.76575300 -3.53196100 1.93450600

H -0.83196100 -4.60430900 1.71367900

H 0.12201300 -3.35294700 2.55015100

H -1.64227900 -3.23120300 2.51755500

H 9.22216300 -1.24909300 -0.10004600

#### TS1-4f

C 3.29250900 -0.07331700 0.13699000

H 3.36893100 0.83692100 0.74516600

H 2.95845500 -0.86608900 0.82015200

C 4.66274400 -0.43243300 -0.44893700

H 4.99862500 0.35834500 -1.13189100

H 4.58855900 -1.34867100 -1.04964500

C 5.73192400 -0.63643800 0.64619500

H 5.39697100 -1.41899100 1.34191600

H 5.81919000 0.28151800 1.24409400

C 7.04459300 -0.99453200 0.10679100

C 8.11910300 -1.29085700 -0.35860400

Si 0.14022300 3.29369900 -0.53232400

C -1.65535700 3.79158100 -0.86657700

H -2.23637800 3.75449100 0.05896800

H -1.70567500 4.81189300 -1.26804400

H -2.12356300 3.12115100 -1.59780200

C 0.93485700 4.45758600 0.73200500

H 0.41983700 4.38220500 1.69408600

H 1.99271800 4.21392100 0.88983200

H 0.88213000 5.49966800 0.39111600

C 1.09887300 3.44549400 -2.16959000

H 2.17436300 3.27476500 -2.03927700

H 0.73441300 2.73539800 -2.92189700

H 0.98070700 4.45510500 -2.58432200

C 2.22068400 0.14635200 -0.95459800

H 2.15917100 -0.74805100 -1.58668200

H 2.54125200 0.97582000 -1.60102400

C 0.89363700 0.46507200 -0.35539800  
 C 0.20570000 1.50968000 0.07177400  
 C -3.45089400 0.53670600 0.52457300  
 C -4.83967000 0.62022700 0.49561500  
 C -5.55542000 -0.35637600 -0.18985100  
 C -4.84523200 -1.37811800 -0.81489000  
 C -3.44877100 -1.40878000 -0.74775600  
 N -2.75531500 -0.45252300 -0.07926100  
 H -6.64030900 -0.32673600 -0.23979600  
 H -2.86530300 1.28754200 1.04287000  
 H -5.33437300 1.44219200 1.00234900  
 H -5.36564600 -2.15929500 -1.36033200  
 Ni -0.71223400 -0.35953000 -0.00243200  
 C -2.69540500 -2.53592300 -1.42250100  
 H -3.42188900 -3.16323500 -1.95093100  
 H -2.02506400 -2.11886300 -2.18619200  
 C -1.88292600 -3.41206900 -0.44254700  
 H -1.60616900 -4.35621300 -0.92678500  
 H -2.49722200 -3.66333800 0.43014700  
 P -0.35032700 -2.51286700 0.13051200  
 C 0.98332300 -3.38023500 -0.82057400  
 H 0.85701300 -3.19652600 -1.89243700  
 H 1.96149200 -2.99045100 -0.52373300  
 H 0.96455200 -4.46149500 -0.63997900  
 C -0.07779200 -3.14580500 1.84393000  
 H -0.04282900 -4.24079000 1.88070200  
 H 0.86052000 -2.73647800 2.22897100  
 H -0.87955900 -2.77805800 2.49040000  
 H 9.07091600 -1.54949900 -0.76286400  
 C -0.52366900 1.36505600 1.81412300  
 O -1.22786200 2.34181000 2.02477300  
 O -0.11478500 0.37698200 2.40517700

#### TS4-4f

C 3.44541100 -0.41016700 0.23221900  
 H 3.73003200 0.61135800 0.51560700  
 H 3.14182500 -0.90971600 1.16325600  
 C 4.64778900 -1.13825800 -0.37931700  
 H 4.95379100 -0.64023800 -1.30827400  
 H 4.36640100 -2.16279100 -0.65594900  
 C 5.85504800 -1.19236100 0.58147500  
 H 5.55367700 -1.67985100 1.51969900  
 H 6.14991600 -0.16918800 0.85379900  
 C 7.00573800 -1.89719500 0.01487400

C 7.94319300 -2.48384000 -0.47060900  
 Si 1.49208000 3.20532000 -0.35185000  
 C 0.16761700 4.45072600 -0.86997900  
 H -0.47678800 4.71459100 -0.02748200  
 H 0.63900900 5.36746600 -1.24678700  
 H -0.46188000 4.04925600 -1.67349000  
 C 2.58645100 3.86604300 1.04009900  
 H 1.98662800 4.04611500 1.93523700  
 H 3.38245700 3.15598500 1.29530800  
 H 3.06519000 4.80654700 0.73751200  
 C 2.59062400 2.89052000 -1.87199100  
 H 3.47012100 2.27652500 -1.64680800  
 H 2.04041000 2.41242700 -2.69131200  
 H 2.96050400 3.85361000 -2.24763300  
 C 2.24208700 -0.34770400 -0.73195600  
 H 1.97026000 -1.36707000 -1.03537900  
 H 2.54245000 0.17376600 -1.65049600  
 C 1.04726100 0.33243300 -0.14604700  
 C 0.64776300 1.56271000 0.16592300  
 C 0.05003000 -2.89599500 0.70549800  
 C -0.08989000 -4.27653700 0.68203800  
 C -1.20908600 -4.82194400 0.05265400  
 C -2.13851300 -3.95890700 -0.51936900  
 C -1.94988500 -2.57393300 -0.45900000  
 N -0.85180300 -2.05481800 0.15080700  
 H -1.35299600 -5.89744100 0.00639900  
 H 0.90347500 -2.42372900 1.17729700  
 H 0.66557400 -4.90214500 1.14535500  
 H -3.02123100 -4.34488500 -1.01940300  
 Ni -0.62687900 -0.17573900 0.32453300  
 C -2.97295500 -1.62039500 -1.02564200  
 H -2.45044200 -0.77572400 -1.49098700  
 H -3.53587200 -2.13085300 -1.81620200  
 C -3.94977000 -1.09704700 0.05132600  
 H -3.40486000 -0.52467700 0.81170500  
 H -4.42969600 -1.94854500 0.55171800  
 P -5.32875600 -0.03869700 -0.67287400  
 C -4.35469200 1.46840100 -1.18979100  
 H -3.82312600 1.26906200 -2.12692500  
 H -5.05439100 2.28952800 -1.38241100  
 H -3.63223000 1.77927700 -0.42680400  
 C -6.03403000 0.59643600 0.93425000  
 H -5.26602500 1.04915400 1.57251700  
 H -6.80368400 1.34640200 0.72188400



H -6.51215700 -0.22498300 1.47922200  
H 8.77564500 -2.99775800 -0.89411600  
C -0.66420800 1.98649600 1.22552700  
O -1.74272100 1.32442900 1.18499700  
O -0.34608300 2.95957400 1.88966300

# **INT8-4gh**

C 2.35194000 2.76611100 -1.23774300  
C 4.19007500 1.37445800 -0.01567600  
H 2.02975500 3.11648800 -0.24674900  
H 2.27633900 3.63185400 -1.91223000  
C 3.76000700 -0.09240100 -0.22212900  
H 5.28272400 1.37492900 0.09520900  
H 4.06751800 -0.40416900 -1.23076100  
H 4.32278800 -0.72129200 0.48311500  
C 1.40722500 1.72797900 -1.71700100  
C 0.55732900 1.25542900 -2.51947600  
C 2.31519900 -0.39336400 -0.04443700  
C 1.39014500 -1.03179800 0.55017700  
Si 0.90989800 -2.25236000 1.84786800  
H -0.02681000 1.31121200 -3.42300000  
Ni 0.68796600 0.02682300 -1.01130500  
C 2.20782800 -2.23797900 3.23353700  
H 1.95809900 -2.96453500 4.01751700  
H 3.20327300 -2.49135800 2.84955300  
H 2.27547900 -1.24960300 3.70332200  
C -0.78214500 -1.85128800 2.59667700  
H -1.56557100 -1.85008300 1.83073900  
H -1.05595300 -2.59384600 3.35694100  
H -0.78553700 -0.86623200 3.07781500  
C 0.83995400 -3.99535800 1.09813800  
H 0.62813800 -4.74332900 1.87303300  
H 0.05441300 -4.07326800 0.33773500  
H 1.79238200 -4.26397900 0.62598900  
C 3.83292900 2.34799500 -1.14712600  
H 4.41656900 3.26673800 -1.00034700  
H 4.15263400 1.92871700 -2.11092100  
H 3.78352300 1.74422800 0.93561300  
C -0.93653300 -2.24636400 -1.80249000  
C -2.32598200 -0.46519000 -1.26816400  
C -2.00672600 -3.06143300 -2.15435400  
H 0.08445000 -2.60865200 -1.86304900  
C -3.45005500 -1.23601400 -1.59616000  
C -3.29715700 -2.54429300 -2.04333600

H -1.82520400 -4.07305200 -2.50294000  
H -4.43743300 -0.79394100 -1.50201300  
H -4.16422600 -3.14489600 -2.30405600  
C -2.48682600 0.95896300 -0.79009200  
H -1.71111700 1.56927200 -1.26339300  
H -3.46055000 1.33587700 -1.12538600  
C -2.38307500 1.10050600 0.74246000  
H -3.12000400 0.44475000 1.22513100  
H -1.38855200 0.77944500 1.07531300  
P -2.74520800 2.84785400 1.32731000  
C -2.44904900 2.60070800 3.15470200  
H -1.48903300 2.11242800 3.36335600  
H -2.46489100 3.57217600 3.66088000  
H -3.25359900 1.99133500 3.58057100  
C -1.13809500 3.68520600 0.87635800  
H -0.26436500 3.13497300 1.24669100  
H -1.05371200 3.77498300 -0.21150500  
H -1.12636800 4.69698600 1.29676400  
N -1.07722800 -0.97874600 -1.36648600

# **INT8-4gh'**

C 4.37925400 1.26633600 -1.14811300  
C 3.48481100 -0.50649500 -2.84155900  
H 4.86395000 0.43099200 -0.62214100  
H 5.09151800 2.10443300 -1.12412700  
C 1.97344000 -0.57552500 -2.53052100  
H 3.60376900 -0.77290800 -3.90035900  
H 1.47507900 0.27275700 -3.01899400  
H 1.56589600 -1.48538500 -2.99485200  
C 3.15612500 1.66418400 -0.40560100  
C 2.46770200 2.51904300 0.23216000  
C 1.60252800 -0.60921300 -1.09553000  
C 1.16340200 -1.16576300 -0.05281600  
Si 0.75828200 -2.70617200 0.88579600  
H 2.37387700 3.52818900 0.60079300  
Ni 1.51976000 0.84651800 0.26150500  
C 1.05647600 -4.18606600 -0.26449100  
H 0.87387100 -5.13406400 0.25777500  
H 0.38922300 -4.15058500 -1.13386400  
H 2.08792200 -4.20164500 -0.63543300  
C 1.90982300 -2.83480400 2.38434900  
H 1.79743200 -1.96862100 3.04694500  
H 1.70095300 -3.73838500 2.97119200  
H 2.95968200 -2.87293500 2.07065300

C -1.04329600 -2.75848400 1.46861500  
 H -1.29700900 -3.77787200 1.78781000  
 H -1.21938900 -2.10014400 2.32721400  
 H -1.74214500 -2.46760300 0.67580700  
 C 4.16413100 0.85186500 -2.61769500  
 H 5.15358900 0.81423800 -3.09302700  
 H 3.60004200 1.63785600 -3.13851900  
 H 4.00808400 -1.28243400 -2.26651600  
 C -4.83596600 -1.28659400 -1.04264100  
 C -3.51699300 0.58613700 -0.80493000  
 C -5.90748200 -0.55224900 -1.55405500  
 H -4.91661800 -2.36616700 -0.92298600  
 C -4.53885200 1.40301000 -1.30654800  
 C -5.74986300 0.82614000 -1.68681200  
 H -6.83092500 -1.04865800 -1.83664700  
 H -4.38121700 2.47406600 -1.39794100  
 H -6.55436400 1.44268500 -2.07946700  
 C -2.17989000 1.15445000 -0.37726200  
 H -1.38700600 0.67390200 -0.96316700  
 H -2.14687400 2.22637800 -0.60658200  
 C -1.89576900 0.90964600 1.11649500  
 H -2.64348900 1.41719300 1.74182600  
 H -1.98102900 -0.16315600 1.30992400  
 P -0.18113200 1.43404000 1.63299300  
 C -0.42563100 3.26138000 1.85871100  
 H -1.29446900 3.48234300 2.48998800  
 H 0.46693300 3.69373100 2.32169000  
 H -0.56078100 3.73997800 0.88367200  
 C -0.16152700 0.89072800 3.40912200  
 H -1.04773900 1.23689900 3.95430700  
 H -0.11323600 -0.20058200 3.46527000  
 H 0.73334400 1.29191300 3.89648000  
 N -3.67081000 -0.74421100 -0.67574000

# **TS7-4gh**

C -1.21794200 1.95972300 -1.04682900  
 C -0.13161400 1.78523500 -1.84203200  
 C -2.20653000 0.85047200 -0.49724600  
 C -1.68607300 -0.20775600 0.12771000  
 Si -2.32213500 -1.59760300 1.19195700  
 H 0.41553700 2.69770800 -2.09918000  
 Ni -0.04973800 0.14317800 -0.81217100  
 C -3.88861000 -1.09859700 2.14877700  
 H -4.75332400 -0.95588000 1.49073300

H -4.15456900 -1.87728200 2.87556800  
 H -3.73578000 -0.16568700 2.70425500  
 C -2.71963500 -3.13914700 0.15395000  
 H -3.46528800 -2.92015200 -0.61975000  
 H -1.82607500 -3.53283200 -0.34345400  
 H -3.12392900 -3.93733600 0.78981300  
 C -0.99676500 -2.05081700 2.46994000  
 H -1.35584500 -2.83993900 3.14264400  
 H -0.08079400 -2.41326800 1.98971200  
 H -0.72974700 -1.18430700 3.08694600  
 C 1.96493400 -1.76306600 -0.04344200  
 C 2.65589000 -2.97530100 -0.14714300  
 C 2.23229600 -3.95325800 -1.04217800  
 C 1.10928000 -3.69443100 -1.82938800  
 C 0.45991200 -2.47685300 -1.68029100  
 N 0.86687000 -1.52823900 -0.80706300  
 H 2.76597600 -4.89556700 -1.12490000  
 H 3.52645900 -3.13650800 0.48120300  
 H 0.73636000 -4.41829800 -2.54635500  
 H -0.41704300 -2.22750500 -2.26677100  
 C 2.44224200 -0.66441700 0.87230600  
 C 3.32780100 0.35838800 0.12639900  
 P 3.98248900 1.71581600 1.24865400  
 C 4.82869400 2.75216400 -0.05386000  
 C 2.42871600 2.72726900 1.47401400  
 H 3.00676000 -1.10418000 1.70306900  
 H 1.56570900 -0.15969800 1.29424700  
 H 4.20038400 -0.15595400 -0.29810500  
 H 2.76179500 0.79497500 -0.70735200  
 H 1.76169100 2.23702200 2.19065900  
 H 2.69499600 3.70539600 1.89008500  
 H 1.88368400 2.87329400 0.53362400  
 H 4.17176900 2.97802100 -0.90284600  
 H 5.16403600 3.69493800 0.39192000  
 H 5.71522500 2.22645500 -0.42495600  
 C -3.66558000 1.21119000 -0.71767400  
 C -4.01987400 2.59486300 -0.14256800  
 C -3.07357500 3.67584900 -0.67809700  
 C -1.60271600 3.30652000 -0.42090800  
 H -3.84507400 1.22521600 -1.80412000  
 H -0.93858900 4.08438400 -0.81462700  
 H -1.43751500 3.25813500 0.66658100  
 H -4.31435400 0.43951300 -0.29248200  
 H -3.22953600 3.79879800 -1.75915300

H -3.30059900 4.64426500 -0.21252700  
H -5.06239600 2.84047600 -0.38365700  
H -3.94790200 2.55549300 0.95354700

# **TS7-4gh\***

C -1.98532200 2.07095700 0.27146600  
C -0.68686600 1.94731900 0.54174300  
C -2.80704900 0.84161700 -0.33110200  
C -2.64957000 -0.45944700 0.00118200  
Si -3.41577100 -2.05469700 -0.52092100  
H -0.00167900 2.71802600 0.88314700  
Ni -0.83088100 0.10526700 0.55256900  
C -2.10028300 -3.07955000 -1.43725800  
H -2.48709500 -4.06940400 -1.71143000  
H -1.77841300 -2.58022600 -2.35966000  
H -1.21132000 -3.22568700 -0.81252500  
C -3.91752500 -2.98244600 1.06072400  
H -4.67626600 -2.42306500 1.62212200  
H -4.33432900 -3.97161400 0.83115900  
H -3.05503000 -3.12061100 1.72296800  
C -4.96914800 -2.01456800 -1.63511800  
H -5.37003800 -3.02927100 -1.76190300  
H -5.76890900 -1.40122900 -1.20148600  
H -4.75414700 -1.62189600 -2.63651600  
P 1.06070800 -0.37043200 1.41178800  
C 1.24936500 -2.15641200 1.85343000  
H 1.16629700 -2.76299300 0.94653600  
H 2.20642800 -2.36853500 2.34291500  
H 0.43272300 -2.43907200 2.52432100  
C 1.41986300 0.48939600 3.00876900  
H 2.36649200 0.16342500 3.45254100  
H 1.45210800 1.57058200 2.84434500  
H 0.60827400 0.27970400 3.71206000  
C 2.52373500 -0.00484400 0.32620100  
H 2.42316600 1.04151000 0.01431600  
H 2.39661300 -0.60970900 -0.57899700  
C -2.80178700 3.32871900 0.52331200  
C -3.68286000 1.35245200 -1.48524900  
C -3.65662600 3.74985700 -0.68037800  
C -4.53546000 2.58470100 -1.14285400  
H -5.12856500 2.87688400 -2.01985200  
H -5.25045500 2.32541100 -0.34886700  
H -3.47523100 3.12201500 1.37038100  
H -2.13678100 4.14247200 0.83557000

H -3.02131800 1.61855500 -2.32609500  
H -4.31960800 0.53525300 -1.82998400  
H -2.99917100 4.06355900 -1.50373000  
H -4.26929400 4.62048300 -0.41194400  
C 3.92677400 -0.26185200 0.91262300  
H 3.99235200 -1.29411900 1.27567800  
H 4.11349000 0.40053500 1.76512100  
C 5.00506600 -0.06282800 -0.13353100  
C 5.91927400 0.99498200 -0.06038900  
C 6.88176300 1.12980500 -1.06072100  
H 5.87752100 1.69661500 0.76812800  
C 5.94624000 -0.81491500 -2.09217000  
C 6.90015300 0.20507800 -2.10300200  
H 7.60359500 1.94146800 -1.02454400  
H 5.92644300 -1.55839500 -2.88772300  
H 7.63048700 0.26730000 -2.90394300  
N 5.01972500 -0.95447700 -1.13915100

# **INT9-4gh**

C -1.51438300 0.52710200 -1.88180600  
C -0.24376800 0.08075300 -1.82210300  
C -2.33905700 0.07740300 -0.72671300  
C -1.63833700 -0.63247000 0.19181700  
Si -2.17592800 -1.51340500 1.74034400  
H 0.51090400 0.30580300 -2.58385600  
Ni 0.19155400 -0.88468000 -0.26848600  
C -2.87900600 -0.36222900 3.08331400  
H -3.80645200 0.12301700 2.75660300  
H -3.10223600 -0.91775100 4.00365000  
H -2.16425000 0.43049000 3.33499000  
C -3.43074800 -2.90553100 1.40817900  
H -4.37816200 -2.50870700 1.02436600  
H -3.04417600 -3.61069000 0.66221000  
H -3.65233800 -3.47237900 2.32198100  
C -0.60542300 -2.32950500 2.46273000  
H -0.83548600 -2.91355800 3.36301700  
H -0.13932100 -3.02058100 1.74549100  
H 0.14776100 -1.58260500 2.75044100  
C 3.17598500 -0.66851700 -0.01443500  
C 4.49643000 -1.00132600 -0.33721700  
C 4.75368300 -1.97864300 -1.29499000  
C 3.67761800 -2.60836700 -1.92028200  
C 2.39094000 -2.23078100 -1.55383700  
N 2.13800400 -1.29004400 -0.62258800

|                  |             |             |             |   |             |             |             |
|------------------|-------------|-------------|-------------|---|-------------|-------------|-------------|
| H                | 5.77614700  | -2.24406800 | -1.54893000 | C | 4.93055700  | -1.87355800 | 0.71405200  |
| H                | 5.31041700  | -0.48985100 | 0.16715100  | H | 5.65832800  | -1.05505600 | 0.65802400  |
| H                | 3.82523700  | -3.37389800 | -2.67478300 | H | 5.35506600  | -2.65345200 | 1.35970800  |
| H                | 1.51624500  | -2.68100900 | -2.01290100 | H | 4.82753400  | -2.29030400 | -0.29502300 |
| C                | 2.86089800  | 0.41738700  | 0.98713300  | C | 3.48186700  | -0.62490200 | 3.14832500  |
| C                | 2.46401700  | 1.74314600  | 0.30328800  | H | 3.89546800  | -1.40315000 | 3.80315600  |
| P                | 2.12838800  | 3.12790100  | 1.52954500  | H | 4.16325900  | 0.23365500  | 3.17963500  |
| C                | 1.46193200  | 4.38815800  | 0.32362900  | H | 2.52494300  | -0.30129100 | 3.57550600  |
| C                | 0.51483700  | 2.53270700  | 2.25886800  | C | -4.13753400 | 0.72935100  | 0.38498800  |
| H                | 3.73285700  | 0.57662600  | 1.63228200  | C | -4.04600100 | 1.58200300  | 1.49222400  |
| H                | 2.04037200  | 0.07852800  | 1.63106700  | C | -5.21093300 | 1.94639200  | 2.16670900  |
| H                | 3.28425300  | 2.07746800  | -0.34603700 | C | -6.43156100 | 1.44707500  | 1.71577800  |
| H                | 1.58204800  | 1.57782500  | -0.32930700 | C | -6.42352700 | 0.60140800  | 0.60478700  |
| H                | 0.70326700  | 1.74953500  | 3.00106100  | N | -5.31428600 | 0.24536200  | -0.05070900 |
| H                | 0.03429200  | 3.36679400  | 2.78263700  | H | -5.16448200 | 2.60858400  | 3.02731000  |
| H                | -0.17495200 | 2.14086000  | 1.50134600  | H | -3.07680300 | 1.95288800  | 1.81350200  |
| H                | 0.66614800  | 3.97786200  | -0.30969800 | H | -7.36576800 | 1.70266300  | 2.20667700  |
| H                | 1.06487000  | 5.24600400  | 0.87719400  | H | -7.35640300 | 0.19091700  | 0.22004500  |
| H                | 2.27206500  | 4.75247800  | -0.31749500 | C | -2.90747900 | 0.29439000  | -0.38405500 |
| C                | -3.83681400 | 0.33865100  | -0.73237000 | C | -2.69587200 | -1.23000800 | -0.30289800 |
| C                | -4.24518300 | 1.50933700  | -1.64410700 | P | -1.17062500 | -1.82264500 | -1.18805000 |
| C                | -3.61583400 | 1.36251000  | -3.03660100 | C | -1.33281100 | -3.66084100 | -0.99394700 |
| C                | -2.08243400 | 1.44967200  | -2.94498700 | C | -1.59689100 | -1.59732000 | -2.97527800 |
| H                | -4.34873400 | -0.56595800 | -1.09995500 | H | -2.01981700 | 0.81665200  | -0.01169300 |
| H                | -1.61672800 | 1.24883200  | -3.91856700 | H | -3.03840500 | 0.58682400  | -1.43366400 |
| H                | -1.82258600 | 2.49068900  | -2.69143800 | H | -2.58363000 | -1.53042400 | 0.74707500  |
| H                | -4.20460100 | 0.49938900  | 0.28899600  | H | -3.58145200 | -1.74371300 | -0.69627600 |
| H                | -3.91184800 | 0.39479000  | -3.46749100 | H | -1.58738600 | -0.53429100 | -3.23159800 |
| H                | -3.99249300 | 2.13964800  | -3.71403000 | H | -0.83875100 | -2.09392700 | -3.58925800 |
| H                | -5.33920200 | 1.55662200  | -1.71856600 | H | -2.58185300 | -2.01510400 | -3.21295200 |
| H                | -3.91779400 | 2.46154500  | -1.20074900 | H | -2.31331000 | -4.01629300 | -1.33025200 |
| <b>INT9-4gh'</b> |             |             |             | H | -0.55458100 | -4.16336600 | -1.57765500 |
| C                | 1.65214300  | 1.74308300  | -1.09864600 | H | -1.19782200 | -3.93633200 | 0.05690400  |
| C                | 0.65738000  | 0.86993700  | -1.35411500 | C | 3.74261400  | 2.12345500  | 0.39961600  |
| C                | 2.65336900  | 1.20962700  | -0.13523000 | C | 4.03466800  | 3.32005400  | -0.52399100 |
| C                | 2.41179400  | -0.07125100 | 0.22502900  | C | 2.73437400  | 4.03198700  | -0.92457600 |
| Si               | 3.25333600  | -1.26411300 | 1.37093400  | C | 1.84162200  | 3.09618700  | -1.75843500 |
| H                | -0.15049800 | 1.09208200  | -2.05984000 | H | 3.41509400  | 2.52395500  | 1.37323900  |
| Ni               | 0.80022200  | -0.81151000 | -0.50014600 | H | 0.87086100  | 3.56266100  | -1.97145700 |
| C                | 2.07648000  | -2.77107700 | 1.44751500  | H | 2.33142100  | 2.94999400  | -2.73497700 |
| H                | 2.49798900  | -3.59065400 | 2.04349500  | H | 4.65994400  | 1.55493400  | 0.59959600  |
| H                | 1.11224000  | -2.50454200 | 1.90285900  | H | 2.20072200  | 4.34974700  | -0.01662300 |
| H                | 1.87813600  | -3.18186000 | 0.44533800  | H | 2.95494800  | 4.94209100  | -1.49699500 |
|                  |             |             |             | H | 4.71669700  | 4.01775100  | -0.02139800 |

H 4.54921800 2.97439300 -1.43279500

#### TS8-4g

C -3.48190400 1.35283300 -1.40089800  
C -4.64482900 0.41803400 0.61868000  
H -4.10702600 0.83333400 -2.14333400  
H -3.12336900 2.26356600 -1.89847800  
C -3.34993400 -0.14898900 1.22444300  
H -5.36534400 0.61890000 1.42123200  
H -3.04962800 0.50353400 2.05788700  
H -3.54548600 -1.13036400 1.66978000  
C -2.31451900 0.44159600 -1.06762600  
C -1.29992500 0.18796600 -1.94095400  
C -2.19262400 -0.22985700 0.23071100  
C -0.99086300 -0.84836000 0.44615900  
Si -0.65970400 -2.00612600 1.90819500  
H -1.18750500 0.78948800 -2.84705700  
Ni 0.20099700 -0.63009600 -1.07249400  
C -1.89820800 -3.45289900 1.88196700  
H -2.94084200 -3.14457700 2.00829200  
H -1.82947200 -3.99587600 0.93161000  
H -1.66394600 -4.16121100 2.68741500  
C 1.04535800 -2.84029000 1.86437300  
H 1.87486300 -2.14097800 2.00885000  
H 1.09175500 -3.57661200 2.67727100  
H 1.21682500 -3.37954300 0.92594300  
C -0.76828300 -1.09891600 3.58063700  
H -0.54981800 -1.79086800 4.40446700  
H -0.03925000 -0.28086100 3.63698200  
H -1.75975200 -0.67041700 3.76297800  
C -4.35411100 1.69111700 -0.18344000  
H -5.28508800 2.16648400 -0.51557900  
H -3.83951800 2.41821400 0.46141000  
H -5.10887100 -0.32745800 -0.04302500  
C 2.81619800 -1.80384200 -1.01679800  
C 2.71015200 0.02301800 0.42700600  
C 4.16510800 -2.00936800 -0.75859800  
H 2.27571300 -2.42557700 -1.72260200  
C 4.06850800 -0.13382300 0.73192200  
C 4.80341000 -1.15749300 0.14279300  
H 4.69355900 -2.81794300 -1.25227300  
H 4.53489200 0.55455500 1.43006700  
H 5.85588500 -1.28629300 0.37944800  
C 1.91883600 1.16824300 1.00872800

H 0.87263200 0.86094600 1.11116900

H 2.30586000 1.39741700 2.00910800

C 2.00614200 2.43375900 0.12579500

H 3.06008600 2.67868900 -0.06249900

H 1.53768300 2.23951400 -0.84870400

P 1.24561100 3.94397300 0.94533300

C 1.48673200 5.16682600 -0.44428000

H 1.11427900 4.79393300 -1.40635400

H 0.96087700 6.09700000 -0.20288900

H 2.55102200 5.40495200 -0.54690500

C -0.56878700 3.57538100 0.71652200

H -0.81756500 3.31378400 -0.31887700

H -0.86684700 2.74408400 1.36333600

H -1.15283500 4.45394200 1.01242700

N 2.09685900 -0.82397300 -0.43202100

C -0.67100200 -1.51967800 -2.87923100

O -1.57779600 -2.22910500 -3.18106200

O 0.53020400 -1.26572800 -3.04884900

#### TS8-4g'

C 0.96955800 3.41422900 0.08863300  
C 3.48254700 3.70547300 -0.04176200  
H 0.81057800 3.66500500 1.14955800  
H 0.01602600 3.64442000 -0.40545500  
C 3.69965200 2.27397600 -0.56206900  
H 4.29266800 4.35592100 -0.39334800  
H 3.86429000 2.31553600 -1.65027400  
H 4.61422500 1.84593000 -0.13317000  
C 1.22465700 1.93250000 0.06000700  
C 0.26371400 0.97971200 0.42534800  
C 2.51257300 1.37153600 -0.26698300  
C 2.46615600 0.00205400 -0.32500800  
Si 3.76442800 -1.26322300 -0.82238200  
H -0.78908900 1.24007500 0.27421400  
Ni 0.85025100 -0.81879500 0.15798700  
C 5.23353000 -1.27129100 0.37950000  
H 5.80588000 -0.33798000 0.32961900  
H 4.89321000 -1.39784800 1.41378200  
H 5.91996800 -2.09594500 0.14803700  
C 2.89556900 -2.95644000 -0.71061400  
H 2.06682500 -3.03612900 -1.42664500  
H 3.59207400 -3.77566300 -0.93037400  
H 2.49735900 -3.14220800 0.29768000  
C 4.36971900 -1.00998100 -2.60320100

H 5.06058500 -1.80827700 -2.90300700  
 H 3.53043600 -1.01190400 -3.30888200  
 H 4.89526600 -0.05456400 -2.71529100  
 C 2.12177000 4.24760700 -0.49876800  
 H 2.00301000 5.29646700 -0.20213500  
 H 2.07686400 4.22443700 -1.59719200  
 H 3.52520100 3.71038700 1.05665700  
 C -6.62695800 0.02657400 -0.73046100  
 C -4.33705000 0.18691000 -0.86529700  
 C -6.79102400 1.41308000 -0.73372900  
 H -7.49479100 -0.62952400 -0.67624800  
 C -4.40181200 1.58571800 -0.87354200  
 C -5.64816300 2.20749200 -0.80643200  
 H -7.78348100 1.85030900 -0.68086600  
 H -3.48976900 2.17321000 -0.93119400  
 H -5.72349100 3.29164700 -0.81136200  
 C -3.01438700 -0.54952000 -0.90874200  
 H -3.08099100 -1.32657800 -1.67906500  
 H -2.20868200 0.13382100 -1.19860500  
 C -2.69326400 -1.20030300 0.45136600  
 H -2.63717900 -0.43155100 1.23193600  
 H -3.50572800 -1.88459900 0.72442700  
 P -1.07967800 -2.11976100 0.49517300  
 C -1.16203300 -2.95827500 2.14072700  
 H -2.11723200 -3.47526400 2.28581600  
 H -0.34760000 -3.68617200 2.22060900  
 H -1.01751500 -2.20479100 2.91897200  
 C -1.37346400 -3.52874700 -0.67602700  
 H -2.30183900 -4.06150100 -0.44093800  
 H -1.42553600 -3.16226800 -1.70567600  
 H -0.53708700 -4.23271800 -0.61234800  
 N -5.43803100 -0.58150100 -0.79373600  
 C 0.19521100 0.98379600 2.35465000  
 O -0.09854200 2.08305100 2.76044900  
 O 0.40215400 -0.16429900 2.71248700

#### TS8-4h

C -1.28834800 -2.15823000 2.77258800  
 C -3.54971400 -2.59951000 1.75081400  
 H -1.70123900 -1.63569200 3.65001100  
 H -0.34011400 -2.60376900 3.09937900  
 C -3.20837600 -1.80648400 0.47651700  
 H -4.29972900 -3.36380100 1.51200700  
 H -2.91124800 -2.52509700 -0.30307700

H -4.09663300 -1.29048300 0.09529900  
 C -1.03852700 -1.14310000 1.67344900  
 C 0.10646900 -0.44525700 1.47915600  
 C -2.07115900 -0.82001400 0.67831600  
 C -1.84167200 0.29811900 -0.09210800  
 Si -2.55999400 0.64233100 -1.81143200  
 H 0.98648800 -0.61572200 2.11005300  
 Ni -0.05858200 1.01566300 0.31052700  
 C -4.15039100 1.67889700 -1.73662200  
 H -4.93105000 1.17281500 -1.15617100  
 H -3.97941400 2.65676200 -1.27233400  
 H -4.54447200 1.85316800 -2.74617800  
 C -1.27019400 1.57885000 -2.84750900  
 H -0.32305400 1.02733200 -2.91179500  
 H -1.64122100 1.70873600 -3.87236000  
 H -1.05644900 2.56963000 -2.43542400  
 C -2.94042200 -0.95766000 -2.77235600  
 H -3.15460600 -0.71257700 -3.82093000  
 H -2.08625300 -1.64607500 -2.76543700  
 H -3.80772200 -1.49851400 -2.37978400  
 C -2.29376400 -3.24304600 2.35159400  
 H -2.55635400 -3.86616300 3.21565800  
 H -1.83535100 -3.90968000 1.60631200  
 H -4.00594300 -1.93002600 2.49369800  
 C 1.93922900 2.88422200 1.17520400  
 C 2.88116800 1.22744500 -0.16627700  
 C 3.16074800 3.51843700 1.35824000  
 H 1.02657100 3.27986700 1.60809200  
 C 4.14108900 1.82433700 -0.02687000  
 C 4.28817800 2.97297900 0.74255900  
 H 3.21902000 4.41869500 1.96074100  
 H 4.99401700 1.38200300 -0.53283300  
 H 5.26230800 3.44117900 0.85263900  
 C 2.70938300 -0.02424000 -0.99567200  
 H 1.64304800 -0.16169800 -1.20203300  
 H 3.21793500 0.11678000 -1.95858500  
 C 3.27079600 -1.28095300 -0.29957900  
 H 4.32633200 -1.12164000 -0.04179300  
 H 2.72715600 -1.45779400 0.63674400  
 P 3.20760500 -2.80930400 -1.39242900  
 C 3.77174200 -4.06685400 -0.13275700  
 H 3.19603700 -4.02018900 0.79991400  
 H 3.67171100 -5.07257900 -0.55516100  
 H 4.83080100 -3.90882800 0.09871000

C 1.37412900 -3.15965300 -1.37045200  
H 0.93837900 -3.07369100 -0.36801000  
H 0.85150900 -2.46499300 -2.03601600  
H 1.20072400 -4.17225800 -1.75156900  
N 1.79734700 1.76237400 0.43965400  
C -1.89490000 2.20858000 0.79986900  
O -2.75294900 2.27256200 1.61917800  
O -1.07321200 2.83679300 0.12279000

#### TS8-4h'

C -1.41003600 2.88616900 -2.25891600  
C -3.39360900 3.60558100 -0.88848200  
H -2.02221400 2.63075800 -3.13865400  
H -0.42182800 3.16916900 -2.64316700  
C -3.12919000 2.54076300 0.19044200  
H -3.92163300 4.45450500 -0.43644200  
H -2.60594000 3.02738600 1.02808100  
H -4.07521600 2.16685700 0.59521700  
C -1.29384400 1.65921900 -1.37475300  
C -0.31082900 0.73373100 -1.44856900  
C -2.27955300 1.38221100 -0.31148500  
C -2.24823100 0.13025100 0.24481700  
Si -2.82434400 -0.38500400 1.97231300  
H 0.51904400 0.86908400 -2.15194700  
Ni -0.67444400 -0.85666600 -0.50285100  
C -4.43594500 -1.38846400 1.93433300  
H -5.24831000 -0.82266100 1.46301000  
H -4.32010400 -2.32566900 1.37903800  
H -4.75225600 -1.64231400 2.95433000  
C -1.45272400 -1.44899500 2.75086900  
H -0.49815200 -0.90802000 2.78167300  
H -1.71772900 -1.70863300 3.78396500  
H -1.30034100 -2.38094100 2.19767600  
C -3.08203300 1.07775800 3.16447000  
H -3.22825100 0.68586100 4.17973700  
H -2.21084300 1.74319200 3.19395600  
H -3.95935200 1.68504200 2.91895900  
C -2.08496100 4.06587000 -1.54101100  
H -2.27305400 4.87953900 -2.25255100  
H -1.41392500 4.46725100 -0.76736700  
H -4.05905000 3.19427200 -1.66091500  
C 6.55250000 0.41883100 0.73601200  
C 4.25396100 0.49111800 0.71231600  
C 6.66036800 1.79812800 0.92477400

H 7.44749000 -0.19829200 0.66764600  
C 4.26206000 1.87903700 0.89793200  
C 5.48443700 2.54164200 1.00638800  
H 7.63578500 2.26836200 1.00479300  
H 3.32493400 2.42534300 0.95719200  
H 5.51602900 3.61810400 1.15277000  
C 2.96017300 -0.28528700 0.57928600  
H 2.94790700 -1.06671200 1.34982500  
H 2.10278800 0.37126200 0.76336100  
C 2.82530300 -0.93210200 -0.81224700  
H 2.80656300 -0.14945400 -1.58075800  
H 3.69793300 -1.56550400 -1.01056300  
P 1.26906600 -1.91983200 -1.01308600  
C 1.37489600 -2.48863000 -2.76878400  
H 2.33563600 -2.97086400 -2.98097900  
H 0.56570200 -3.19818600 -2.96787400  
H 1.24695600 -1.63269700 -3.43846300  
C 1.59514900 -3.47165500 -0.06203800  
H 2.52300800 -3.95668500 -0.38528900  
H 1.66399000 -3.24792600 1.00683500  
H 0.75641100 -4.15961700 -0.20728800  
N 5.38733400 -0.22786800 0.63126700  
C -2.67684900 -1.62840900 -0.86839300  
O -3.60468400 -1.44474800 -1.58771400  
O -1.94660600 -2.47439700 -0.33137600

#### INT7-4e

C 4.26147300 1.94030100 2.10842300  
C 4.69325000 0.80030000 1.18187300  
C 3.85428800 0.79488900 -0.10681600  
C 2.34357000 0.75136300 0.15187900  
C 1.51841300 -0.07729600 -0.51704000  
Si 1.87190800 -1.16251700 -2.02765400  
C 2.96705700 -2.65167500 -1.57110600  
H 2.48711900 -3.27763800 -0.80856300  
H 3.13983600 -3.28253300 -2.45251000  
H 3.94679100 -2.34924600 -1.18395500  
C 0.24945700 -1.84375400 -2.73594100  
H 0.44998200 -2.40869600 -3.65566700  
H -0.25780700 -2.51826700 -2.03685700  
H -0.44245200 -1.03179700 -2.98906100  
C 2.69465700 -0.14209100 -3.40007000  
H 2.06812000 0.72043300 -3.65614900  
H 3.67988200 0.23921800 -3.11108200

H 2.82254500 -0.74498400 -4.30832900  
 C 2.76009000 1.83538400 2.42267600  
 C 1.89624400 1.74994100 1.17357300  
 C 0.84991300 2.59136400 1.03279100  
 H 0.69148700 3.34345800 1.80366400  
 Ni -0.31405700 0.02387400 -0.10911500  
 C -0.12990000 2.73951600 -0.09470700  
 O -0.65807000 3.83164200 -0.27736800  
 O -0.42988400 1.67835400 -0.82424900  
 P -4.62721800 0.92235500 -0.23226400  
 C -4.37917600 2.59590300 0.55565800  
 C -3.23185300 0.00519000 0.64118200  
 C -3.83050300 1.24977300 -1.88814100  
 H -4.59533200 2.53671300 1.62831900  
 H -5.08959700 3.30383200 0.11506700  
 H -3.36419700 2.98478700 0.40906800  
 H -2.32805000 0.63648700 0.61711200  
 H -3.51377600 -0.09412200 1.69745200  
 H -4.44541700 1.97885400 -2.42765700  
 H -3.81296700 0.33403100 -2.48963400  
 H -2.81313900 1.64515700 -1.79146300  
 C -2.95281000 -1.39378400 0.05052100  
 H -2.63340700 -1.29505500 -0.99522600  
 H -3.87947900 -1.97836000 0.04588900  
 C -1.89219600 -2.15903400 0.80902500  
 C -2.19454600 -3.31277100 1.53713900  
 C 0.34617000 -2.31881000 1.45862400  
 C -1.19161100 -3.97825600 2.23866500  
 H -3.21606200 -3.67924100 1.54509100  
 C 0.10598900 -3.47004600 2.19926700  
 H 1.33350600 -1.87698300 1.38479500  
 H -1.42013900 -4.87632300 2.80534700  
 H 0.92171700 -3.94996600 2.72955100  
 N -0.62266800 -1.67626900 0.77632300  
 H 4.15582000 -0.04043400 -0.74431900  
 H 4.07654800 1.71620500 -0.66821900  
 H 5.75725700 0.88949700 0.92795000  
 H 4.57089900 -0.16129700 1.70188800  
 H 4.83934000 1.92330500 3.04113000  
 H 4.46596700 2.90527400 1.62398000  
 H 2.59927000 0.91966000 3.01532000  
 H 2.43534000 2.67494200 3.04722900

INT7-4f

C 4.36908100 -2.22722600 1.15934700  
 H 5.15791200 -2.88370200 0.77026400  
 H 4.86251200 -1.48074400 1.79750500  
 C 3.36414500 -3.02619800 1.99413900  
 H 2.93018700 -3.82699900 1.37741300  
 H 3.86374400 -3.51264700 2.84187600  
 C 2.24366500 -2.10696600 2.50302000  
 H 2.67928400 -1.39176200 3.21812700  
 C 1.58183200 -1.30993000 1.38043500  
 C 0.24679100 -1.28262300 1.26833200  
 Si 3.50281900 1.60962900 -1.18380600  
 C 5.15308000 2.03702400 -0.35453000  
 H 5.71210500 1.14447200 -0.04948300  
 H 5.79399800 2.61831700 -1.02970600  
 H 4.97032700 2.63965100 0.54215900  
 C 3.80501100 0.61008900 -2.77761900  
 H 4.30002800 1.25146100 -3.51847100  
 H 4.43071100 -0.27809600 -2.64336100  
 H 2.85412800 0.28114200 -3.21564100  
 C 2.64292900 3.20284600 -1.73433300  
 H 1.67739900 2.99144200 -2.21106800  
 H 2.45553600 3.86772900 -0.88737200  
 H 3.26427800 3.73121600 -2.46865300  
 C 3.67106400 -1.51185600 -0.01229500  
 H 4.40677000 -0.93657700 -0.57703200  
 C 2.51577000 -0.62479400 0.43512400  
 C 2.36655700 0.66020200 0.02857200  
 Ni -0.73233900 -0.29808100 0.03953700  
 H 3.27821400 -2.28105700 -0.69751600  
 H 1.48768400 -2.68055900 3.05177300  
 C 1.31250800 1.56142100 0.62336100  
 O 1.65799400 2.60554500 1.16632800  
 O 0.03692400 1.25136600 0.46679600  
 P -4.51906600 2.34612200 0.44448200  
 C -4.53357700 2.56723100 2.29762300  
 C -3.88974900 0.57159100 0.39783900  
 C -2.95176400 3.27238200 0.03463800  
 H -5.30989200 1.93448500 2.74175400  
 H -4.77891200 3.60822800 2.53372900  
 H -3.56800500 2.32291200 2.75673500  
 H -3.03640400 0.45530400 1.08043900  
 H -4.69876100 -0.06922100 0.77220800  
 H -3.08534900 4.32253300 0.31781200  
 H -2.77507400 3.25224900 -1.04636400



H -2.06437200 2.87778200 0.54321200  
 C -3.49231800 0.11278000 -1.02230600  
 H -2.65194900 0.72306600 -1.38620700  
 H -4.32218100 0.29448800 -1.71496600  
 C -3.11047800 -1.34869000 -1.08959100  
 C -3.97916800 -2.31286400 -1.60678300  
 C -1.51663100 -2.99855300 -0.64564500  
 C -3.59435400 -3.65124400 -1.63843000  
 H -4.94890300 -2.00269000 -1.98299700  
 C -2.33620100 -4.00097400 -1.14934600  
 H -0.52991600 -3.20571600 -0.24706800  
 H -4.26315000 -4.40610900 -2.04182800  
 H -1.98813300 -5.02837700 -1.15707300  
 N -1.89058400 -1.70365900 -0.61126500  
 H -0.38619500 -1.80415000 1.99336400

#### TS6-4e

C 1.01239100 1.66685900 -0.12998000  
 C 1.56866700 0.48549700 0.31812700  
 Si 2.31449200 0.06871800 2.02041500  
 C 0.89164500 -0.23685400 3.24376000  
 H 0.23938600 -1.04366800 2.88855900  
 H 1.28963900 -0.53786500 4.22130000  
 H 0.27013300 0.65205400 3.40319300  
 C 3.36344800 -1.50089300 1.90694300  
 H 3.86737600 -1.68495900 2.86483600  
 H 2.75564600 -2.38201400 1.67208300  
 H 4.12680100 -1.40587100 1.12828900  
 C 3.42705200 1.46450000 2.66465600  
 H 2.87382400 2.38759600 2.86635600  
 H 3.91612400 1.15883100 3.59857200  
 H 4.21536000 1.69728600 1.93904300  
 C 0.88352500 1.93042200 -1.54558800  
 C 1.62980400 1.25551000 -2.47843600  
 H 1.55913500 1.53160500 -3.52677300  
 Ni 1.19612100 -1.17766500 -0.59395600  
 C 2.71085300 0.32654300 -2.17964900  
 O 3.60731800 0.02462000 -2.94838600  
 O 2.71805200 -0.19919900 -0.89530900  
 P -3.93796300 1.32759900 0.00179300  
 C -5.79363600 1.16920300 0.12037500  
 C -3.50944000 -0.49782900 -0.13405800  
 C -3.54928800 1.60082100 1.80827900  
 H -6.20343500 0.88197700 -0.85395700

H -6.22322900 2.14118500 0.38594000  
 H -6.11068300 0.43199400 0.86871600  
 H -3.87508500 -1.02077700 0.76085800  
 H -4.07290400 -0.89054200 -0.99077300  
 H -3.86987300 2.60650600 2.10085000  
 H -2.46863500 1.53981100 1.97447300  
 H -4.04692600 0.87085600 2.45913800  
 C -2.00766500 -0.74511900 -0.33467200  
 H -1.41961000 -0.22693300 0.43327200  
 H -1.67958200 -0.29821700 -1.28237100  
 C -1.57907200 -2.19594500 -0.32386100  
 C -2.48662100 -3.25935000 -0.27824400  
 C 0.19230200 -3.71841000 -0.34637200  
 C -2.03309000 -4.57606300 -0.27328700  
 H -3.54940500 -3.05195700 -0.25099500  
 C -0.66034500 -4.81299900 -0.30598200  
 H 1.26925600 -3.85096600 -0.36914200  
 H -2.74022200 -5.40006400 -0.24270500  
 H -0.25106900 -5.81756100 -0.29890400  
 N -0.24135500 -2.43607800 -0.36340200  
 C -0.05684100 3.02858200 -2.01655400  
 C -0.09819500 4.23130200 -1.06492700  
 C -0.40332900 3.75575300 0.35716000  
 C 0.68241600 2.79199500 0.85625000  
 H -0.47651000 4.60673400 1.04641500  
 H 0.86821200 4.75505000 -1.08246000  
 H -0.85626200 4.94738800 -1.40510300  
 H -1.07385500 2.61095600 -2.08050300  
 H 0.21699800 3.34285900 -3.02990800  
 H 1.59787500 3.37676100 1.04019200  
 H 0.38721800 2.38237600 1.82881600  
 H -1.38146500 3.25618700 0.36050600

#### TS6-4f

C -3.86699500 2.93469000 -0.09486400  
 C -2.76246300 3.87074500 -0.58667500  
 C -1.88063300 3.13061500 -1.59642600  
 H -1.03168600 3.76143800 -1.88844700  
 C -1.38440500 1.78801800 -1.06203700  
 C -0.21080100 1.26674000 -1.56612600  
 Si -2.96561300 -1.58679900 1.05059000  
 C -1.82042800 -3.00267200 1.59650500  
 H -0.93126000 -2.61347600 2.11163400  
 H -2.34369000 -3.65873600 2.30444000

H -1.49580000 -3.59783500 0.74094000  
 C -3.46350400 -0.76998200 2.70603700  
 H -3.67006000 -1.56655500 3.43309700  
 H -2.65378700 -0.15651900 3.12065800  
 H -4.35941300 -0.14346900 2.65108700  
 C -4.52482700 -2.30919100 0.24672800  
 H -5.25808600 -1.52765900 0.01187800  
 H -4.25652500 -2.81347800 -0.68708100  
 H -5.01425400 -3.03811800 0.90564100  
 C -3.28187000 1.69658800 0.60331400  
 H -2.85996400 2.01005700 1.57083600  
 C -2.19011300 0.98717200 -0.19327800  
 C -2.04695000 -0.40352900 -0.12635300  
 Ni 1.04913200 0.06997000 -0.84873600  
 H -4.09513400 1.00559900 0.83374700  
 H -2.46888400 2.96954800 -2.51621500  
 C -1.30986700 -1.15206700 -1.15781700  
 O -1.53705100 -2.34253900 -1.39996500  
 O -0.36642100 -0.52865700 -1.93558800  
 P 2.37919300 -1.84684800 -0.66116300  
 C 3.63324800 -2.27352900 -1.95535500  
 C 3.38720600 -1.67811500 0.89991000  
 C 1.48975000 -3.44872000 -0.42468700  
 H 4.30089800 -1.42234500 -2.12383300  
 H 3.11163000 -2.48601700 -2.89421800  
 H 4.23066100 -3.14978800 -1.67848100  
 H 3.50230600 -2.65080100 1.39226200  
 H 4.39305300 -1.31869800 0.65182100  
 H 0.72492800 -3.54715100 -1.20064700  
 H 0.96466900 -3.43341000 0.53492200  
 H 2.17563800 -4.30356300 -0.44612500  
 C 2.69424000 -0.68016100 1.86234000  
 H 3.12880800 -0.78013900 2.86310900  
 H 1.63010300 -0.93310800 1.95302200  
 C 2.83305400 0.76334000 1.43055300  
 C 3.65284800 1.62861500 2.16332300  
 C 2.32736500 2.48896800 -0.04574800  
 C 3.81322900 2.95390200 1.76882700  
 H 4.15827700 1.25131900 3.04673900  
 C 3.13370400 3.39270400 0.63505600  
 H 1.75989100 2.79457100 -0.91602100  
 H 4.44869500 3.62699800 2.33707400  
 H 3.21178700 4.41570700 0.28188700  
 N 2.17339700 1.19880300 0.32459500

H -2.15437600 4.20286300 0.26760200  
 H -3.19013900 4.77115100 -1.04657300  
 H -4.47567200 2.61724600 -0.95389700  
 H -4.54416000 3.45357100 0.59552900  
 H 0.19978600 1.69271600 -2.48968800

# **L2=PN**

P 2.80811000 -0.48289500 0.24492200  
 C 3.16132100 1.25590600 0.83014800  
 C 1.02071400 -0.29035000 -0.29433500  
 C 3.61782400 -0.39984100 -1.43651500  
 H 2.64066600 1.44648200 1.77442900  
 H 2.85533700 2.01660700 0.10106400  
 H 4.23503500 1.36269000 1.02022100  
 H 0.89458900 0.61256200 -0.90586600  
 H 0.78516500 -1.15107500 -0.93471300  
 H 3.28466500 0.46524400 -2.02326200  
 H 3.39252800 -1.31277600 -1.99849400  
 H 4.70533100 -0.34403300 -1.31668900  
 C 0.03014500 -0.24639200 0.88686500  
 H 0.27066900 0.60619600 1.53307200  
 H 0.13135600 -1.15545800 1.49139400  
 C -1.40038700 -0.09265600 0.41666600  
 C -2.30944700 -1.15812300 0.46272800  
 C -2.98818700 1.28566200 -0.51746800  
 C -3.60764500 -0.96663100 -0.00796200  
 H -1.99985700 -2.11902700 0.86441400  
 C -3.96099500 0.28422600 -0.51150900  
 H -3.22433500 2.27825900 -0.89954600  
 H -4.32958800 -1.77877000 0.02075400  
 H -4.96001900 0.48358800 -0.88749000  
 N -1.74046300 1.11459200 -0.06926200

# **NiL2**

Ni 0.35894800 1.26094000 -0.20760400  
 C -2.49661900 1.21560300 -0.00525100  
 C -1.39507900 -0.81900000 -0.34946400  
 C -3.65421500 0.57912900 0.42935500  
 H -2.44893600 2.29705000 -0.07703500  
 C -2.53372200 -1.50678100 0.06797800  
 C -3.67970800 -0.81326200 0.46774900  
 H -4.51838600 1.17097600 0.71551700  
 H -2.51996100 -2.59285200 0.07371900  
 H -4.56708000 -1.34977900 0.79056100

C -0.15832800 -1.57857600 -0.79386900  
 H -0.45383300 -2.62203600 -0.96313300  
 H 0.16530000 -1.17732600 -1.76322400  
 C 1.04462000 -1.57295700 0.19196200  
 H 0.68082700 -1.73723900 1.21406000  
 H 1.71332300 -2.41194200 -0.05006700  
 P 2.01398500 0.05440300 0.18440800  
 C 3.30763400 -0.31386000 -1.10870500  
 H 3.85583600 -1.24085700 -0.89748600  
 H 2.83181900 -0.39736500 -2.09097700  
 H 4.02037900 0.51616900 -1.15430800  
 C 3.03954800 -0.16599900 1.72599200  
 H 3.79739500 0.62326800 1.77210000  
 H 2.39865500 -0.06846500 2.60804800  
 H 3.54318500 -1.14079900 1.75606300  
 N -1.37194500 0.55186200 -0.37736000

#### Ni(L2)<sub>2</sub>

P 1.68676200 -1.85538100 -1.39296600  
 C 2.69309500 -3.37606800 -1.76468100  
 C 3.03948500 -0.69504600 -0.83524600  
 C 1.35978900 -1.24662800 -3.12207200  
 H 3.07995600 -3.79409300 -0.82995100  
 H 3.53467500 -3.15991000 -2.43436800  
 H 2.05250600 -4.13141900 -2.23122500  
 H 3.50647100 -1.14357400 0.04875400  
 H 3.81274200 -0.61914700 -1.61290400  
 H 2.28353000 -1.15499000 -3.70729300  
 H 0.86155400 -0.27298300 -3.08557600  
 H 0.68601100 -1.94493300 -3.62906700  
 C 2.51679100 0.70023600 -0.44946700  
 H 1.69444300 0.57155700 0.26713700  
 H 2.09825800 1.21121700 -1.32473900  
 C 3.58866800 1.56775700 0.17644000  
 C 3.95456000 2.80171400 -0.37800500  
 C 5.11417800 1.82895300 1.88013800  
 C 4.94381300 3.56257000 0.24333300  
 H 3.46611900 3.15698800 -1.28107100  
 C 5.54168700 3.06899900 1.40163500  
 H 5.55458800 1.40711400 2.78295800  
 H 5.24119000 4.52285200 -0.17029200  
 H 6.31629000 3.62399700 1.92236800  
 N 4.16710000 1.09121500 1.29331300  
 Ni -0.00724800 -2.00599900 -0.07851200

P -1.69427900 -1.95636800 1.24218000  
 C -3.08873400 -0.81790900 0.72960400  
 H -3.86263800 -0.80752300 1.51025200  
 H -3.53415700 -1.27097900 -0.16557200  
 C -2.59931000 0.59985000 0.41497500  
 H -2.13591800 1.04895700 1.30285600  
 H -1.79239800 0.53908200 -0.32821300  
 C -3.64004200 1.58225700 -0.09155500  
 C -4.97068200 1.23392100 -0.35684400  
 C -4.03730400 3.75960600 -0.73154100  
 C -5.84994100 2.20905000 -0.82925300  
 H -5.31689300 0.21853500 -0.19632400  
 C -5.37907200 3.50492000 -1.02414500  
 H -3.62596400 4.75948500 -0.86744300  
 H -6.88617500 1.95651800 -1.03971000  
 H -6.02570600 4.29724700 -1.38920800  
 N -3.18586900 2.83633500 -0.27866200  
 C -1.38448500 -1.39623300 2.99027700  
 H -0.91481700 -0.40808500 2.98774700  
 H -2.30895900 -1.35311600 3.57986400  
 H -0.68845200 -2.09153100 3.47053700  
 C -2.65640600 -3.51717100 1.56489600  
 H -3.50122900 -3.34952200 2.24453600  
 H -3.03307600 -3.91753200 0.61820900  
 H -1.99138800 -4.26752100 2.00440600

#### Ni(L2)<sub>2</sub>-1

Ni 0.05510800 1.49766000 -0.20517200  
 C 2.54594200 2.23583600 0.73850700  
 C 2.70525100 0.87311400 -1.14570200  
 C 3.92454300 2.35816600 0.83783100  
 H 1.88703000 2.73120700 1.44156100  
 C 4.09898200 0.96211700 -1.09590100  
 C 4.72700900 1.70799100 -0.10106300  
 H 4.35321000 2.95679100 1.63543000  
 H 4.68317200 0.44190800 -1.84956300  
 H 5.80985600 1.78301500 -0.06236800  
 C -2.39395500 2.13563400 -1.31499000  
 C -2.62213400 1.25203000 0.82964500  
 C -3.76436700 2.30332000 -1.45444200  
 H -1.71087600 2.42159300 -2.10587300  
 C -4.00921200 1.39941800 0.74586400  
 C -4.59854200 1.92868800 -0.39999100  
 H -4.16194700 2.72407800 -2.37267700

H -4.61893800 1.09676000 1.59227000  
 H -5.67597300 2.04887800 -0.46620800  
 C -1.98178800 0.65110900 2.05697300  
 H -1.03703900 1.17767400 2.23844700  
 H -2.63686200 0.81555900 2.92159900  
 C 2.02080900 0.04272000 -2.20415400  
 H 1.08473900 0.54657000 -2.47376900  
 H 2.65704200 0.00006800 -3.09703100  
 C -1.70264000 -0.85784600 1.89723900  
 H -2.62811700 -1.37400900 1.60803700  
 H -0.97605600 -0.99991100 1.08525300  
 P -1.10127400 -1.67234600 3.47730800  
 C 1.71003300 -1.38904200 -1.72090700  
 H 2.63235600 -1.86479900 -1.36114600  
 H 1.01279300 -1.33511800 -0.87373300  
 P 1.02308500 -2.49410600 -3.07382800  
 C 0.62232300 -3.99228100 -2.03191500  
 H 0.02595900 -3.74232800 -1.14533800  
 H 0.06569000 -4.71845500 -2.63444700  
 H 1.55073700 -4.47405300 -1.70618800  
 C -0.69531800 -1.78394800 -3.24641500  
 H -1.18582800 -1.63125900 -2.27759200  
 H -0.65125400 -0.82283000 -3.76885400  
 H -1.30634400 -2.46203300 -3.85272600  
 C 0.63148000 -0.98162700 3.57514700  
 H 1.16294400 -1.03799500 2.61726600  
 H 0.59852800 0.06558400 3.89325600  
 H 1.19813000 -1.53781200 4.33038200  
 C -0.71028700 -3.36239600 2.78485500  
 H -0.19854500 -3.96119200 3.54624000  
 H -1.64133900 -3.87904800 2.52723500  
 H -0.07559700 -3.31484300 1.89099500  
 N -1.80824000 1.62232100 -0.20068600  
 N 1.92264200 1.51232000 -0.22920200

**Ni(L2)<sub>2</sub>-2**

Ni -0.51381900 0.70761300 0.51129600  
 C -1.35753200 1.02973200 -2.19661400  
 C -2.43571400 -0.79006700 -1.23550300  
 C -2.30546500 1.13648700 -3.20801800  
 H -0.50090700 1.69732300 -2.16609400  
 C -3.41487500 -0.74666200 -2.23190900  
 C -3.36374300 0.22765700 -3.22927700  
 H -2.19964200 1.90365100 -3.96939400

H -4.21216000 -1.48479200 -2.22223700  
 H -4.12156500 0.26631100 -4.00662700  
 C -2.50368500 -1.83055900 -0.14005300  
 H -3.16389100 -2.64125700 -0.47190600  
 H -1.50619400 -2.26475000 0.00513500  
 C -3.02180300 -1.27073100 1.20774400  
 H -3.92621100 -0.67392800 1.03158600  
 H -3.30503200 -2.09775500 1.87227300  
 P -1.73039400 -0.16675000 2.01873100  
 C -0.95232900 -1.38418900 3.19956400  
 H -1.69871200 -1.89980200 3.81803800  
 H -0.37864100 -2.12866700 2.63755000  
 H -0.25509600 -0.85244700 3.85552700  
 C -2.81191100 0.77682600 3.20694400  
 H -2.17980200 1.35708600 3.88711100  
 H -3.43825900 1.48087600 2.64904000  
 H -3.45864800 0.11727400 3.79987800  
 N -1.41367300 0.10913100 -1.20443000  
 P 2.30852600 -2.77476200 -0.13762700  
 C 4.14296100 -3.06097100 0.07724200  
 H 4.73188800 -2.66989200 -0.76254600  
 H 4.49003300 -2.58601300 1.00108000  
 H 4.33564800 -4.13569400 0.16853700  
 C 2.09842300 -3.49308700 -1.84906600  
 H 1.08744500 -3.28036900 -2.21329700  
 H 2.82155700 -3.08925800 -2.56888300  
 H 2.21641600 -4.58155500 -1.80788400  
 C 2.29814300 -0.95575500 -0.58482400  
 H 1.30212600 -0.74135300 -0.99185700  
 H 3.03596100 -0.74942400 -1.37369500  
 C 2.53839300 -0.03053600 0.62754000  
 H 3.55629300 -0.17429800 1.01108500  
 H 1.83404500 -0.29974300 1.42703800  
 C 2.33045600 1.42716300 0.30190500  
 C 3.40773800 2.28158700 0.06578200  
 C 3.19618100 3.62507200 -0.24465700  
 H 4.41635000 1.88200500 0.13067100  
 C 0.84557200 3.18155700 -0.05404000  
 C 1.87470200 4.07656300 -0.30532600  
 H 4.03064500 4.29532500 -0.42788600  
 H -0.18991500 3.50770700 -0.07414500  
 H 1.63899800 5.11131300 -0.53640800  
 N 1.03640700 1.86817100 0.25026600

**Ni(L2)<sub>2</sub>-3**

|    |             |             |             |
|----|-------------|-------------|-------------|
| Ni | -1.20833100 | -0.45179300 | 0.10206300  |
| C  | 0.17858400  | 2.00633700  | 0.56029700  |
| C  | -1.81400400 | 2.37860200  | -0.57761400 |
| C  | 0.29730300  | 3.34883100  | 0.90823500  |
| H  | 0.95631500  | 1.29951600  | 0.82717200  |
| C  | -1.73879500 | 3.74238000  | -0.28385200 |
| C  | -0.68141700 | 4.24162300  | 0.47714400  |
| H  | 1.15836700  | 3.67917000  | 1.48082300  |
| H  | -2.51371600 | 4.40737100  | -0.65487400 |
| H  | -0.61755400 | 5.30110300  | 0.70943600  |
| C  | -2.98345200 | 1.83619500  | -1.37007800 |
| H  | -3.47067400 | 2.67368600  | -1.88419100 |
| H  | -2.60433000 | 1.15864800  | -2.14625900 |
| C  | -4.03119900 | 1.09228400  | -0.50289500 |
| H  | -4.25878300 | 1.69278600  | 0.38739700  |
| H  | -4.96774900 | 0.98018200  | -1.06571800 |
| P  | -3.36630400 | -0.57707200 | 0.05594000  |
| C  | -4.13542700 | -1.67488400 | -1.24310900 |
| H  | -5.22175300 | -1.53632100 | -1.31945900 |
| H  | -3.68239600 | -1.46327600 | -2.21747800 |
| H  | -3.92698200 | -2.72219800 | -1.00140300 |
| C  | -4.51825600 | -0.93094900 | 1.47898500  |
| H  | -4.37619300 | -1.96536200 | 1.80953000  |
| H  | -4.26997200 | -0.27466000 | 2.31972900  |
| H  | -5.57381200 | -0.78691500 | 1.21426000  |
| N  | -0.86434100 | 1.50431300  | -0.14485300 |
| P  | 0.17820300  | -2.09282100 | 0.29448200  |
| C  | 0.01595300  | -3.21642800 | 1.77505200  |
| H  | 0.75505800  | -4.02794200 | 1.76914500  |
| H  | 0.14161700  | -2.63074800 | 2.69195500  |
| H  | -0.99027700 | -3.64702300 | 1.78953900  |
| C  | 0.15214500  | -3.36796500 | -1.06859400 |
| H  | 0.36142100  | -2.88924900 | -2.03067600 |
| H  | 0.88712100  | -4.16598600 | -0.90118000 |
| H  | -0.84631600 | -3.81263700 | -1.12872300 |
| C  | 2.03129400  | -1.77474000 | 0.40477800  |
| H  | 2.59583400  | -2.71440700 | 0.49232500  |
| H  | 2.18663200  | -1.21247000 | 1.33375000  |
| C  | 2.55866700  | -0.93209300 | -0.77230000 |
| H  | 1.81645700  | -0.15587500 | -1.00507700 |
| H  | 2.66286800  | -1.55462800 | -1.66893700 |
| C  | 3.87612900  | -0.25872100 | -0.46015200 |
| C  | 5.06292200  | -0.59901200 | -1.12321700 |

|   |            |             |             |
|---|------------|-------------|-------------|
| C | 6.24714100 | 0.05328300  | -0.78376700 |
| H | 5.05162600 | -1.36429100 | -1.89429300 |
| C | 4.98775100 | 1.30396900  | 0.81677900  |
| C | 6.21494300 | 1.02991200  | 0.21041600  |
| H | 7.17757700 | -0.19674100 | -1.28726400 |
| H | 4.91823300 | 2.06158200  | 1.59664400  |
| H | 7.11022500 | 1.56639600  | 0.50999400  |
| N | 3.84637700 | 0.68527700  | 0.49958000  |

**Ni(L2)<sub>2</sub>-4**

|    |             |             |             |
|----|-------------|-------------|-------------|
| Ni | 0.19397800  | -0.65508500 | 0.21422000  |
| C  | 1.35077100  | 2.05558400  | -0.05686100 |
| C  | 2.84169000  | 0.47858800  | -0.86667700 |
| C  | 2.20067700  | 3.11296700  | -0.35744500 |
| H  | 0.38639400  | 2.23526900  | 0.40778600  |
| C  | 3.74263200  | 1.49614200  | -1.20313900 |
| C  | 3.43110300  | 2.83028500  | -0.95140800 |
| H  | 1.89979900  | 4.13040200  | -0.12566500 |
| H  | 4.69269400  | 1.22945900  | -1.65748600 |
| H  | 4.12977400  | 3.62254500  | -1.20522700 |
| C  | -1.60775200 | 1.13518700  | -1.32033300 |
| C  | -2.77589400 | 0.15198400  | 0.42122100  |
| C  | -2.72483600 | 1.82977800  | -1.76817400 |
| H  | -0.65613400 | 1.22768900  | -1.83438000 |
| C  | -3.93751500 | 0.82999700  | 0.03132800  |
| C  | -3.92497600 | 1.67906600  | -1.07279600 |
| H  | -2.64867000 | 2.46994600  | -2.64215100 |
| H  | -4.85160600 | 0.67865500  | 0.59848800  |
| H  | -4.82537800 | 2.20183700  | -1.38309600 |
| C  | -2.82582400 | -0.80669700 | 1.59070300  |
| H  | -3.85185600 | -0.81142600 | 1.97843300  |
| H  | -2.62490000 | -1.81953300 | 1.21195000  |
| C  | 3.22223600  | -0.96605200 | -1.10449100 |
| H  | 4.23574800  | -0.98303200 | -1.52342700 |
| H  | 3.27209200  | -1.47269200 | -0.12966700 |
| C  | -1.84616800 | -0.49796500 | 2.74500800  |
| H  | -1.84384100 | 0.58022200  | 2.95159300  |
| H  | -2.19171300 | -0.99867300 | 3.65974200  |
| P  | -0.08863100 | -1.01702700 | 2.33046200  |
| C  | 2.27239600  | -1.75477100 | -2.03405900 |
| H  | 1.99370500  | -1.13224000 | -2.89437300 |
| H  | 2.79633100  | -2.63523400 | -2.43023500 |
| P  | 0.69809600  | -2.26481400 | -1.14505300 |
| C  | -0.32860100 | -2.78074200 | -2.62120400 |

H 0.20607800 -3.45529200 -3.30309900  
H -1.23522200 -3.28618300 -2.27018100  
H -0.63987200 -1.88871500 -3.17552700  
C 1.20376800 -3.96915100 -0.56326800  
H 1.58773500 -4.59870500 -1.37721500  
H 1.97495500 -3.87732300 0.20864200  
H 0.34084800 -4.46852400 -0.10953500  
C -0.08825800 -2.74364100 3.04774400  
H -0.39990300 -2.76762300 4.10058900  
H -0.75958800 -3.38104900 2.46282700  
H 0.91929600 -3.16621100 2.96857600  
C 0.80909400 -0.15218800 3.72671700  
H 1.85092700 -0.49057400 3.75122800  
H 0.81513400 0.92769300 3.54293800  
H 0.35651400 -0.34317000 4.70894600  
N -1.60483000 0.30915400 -0.24971400  
N 1.63739800 0.75604500 -0.30001700
